# Supplementary material for: Design, synthesis and biological evaluation of novel morpholinopyrimidine-5-carbonitrile derivatives as dual PI3K/mTOR inhibitors
Source: Royal Society of Chemistry journal article supplement (doi:10.1039/d3md00693j), 2024-01-01

## Design, synthesis and biological evaluation of new synthesized morpholinopyrimidine-5-carbonitrile derivatives as dual PI3K/mTOR inhibitors

Ghada S. Rady<sup>1</sup>, Moshira A. El-Deeb<sup>2</sup>, Marwa T. M. Sarg<sup>2</sup>, Azza T. Taher<sup>3,4,\*</sup>, Amira A. Helwa<sup>5,\*</sup>

- 
- 1 Directorate of Health Affairs in Giza, Ministry of Health, Egypt.
  - 2 Department of Pharmaceutical Organic Chemistry, Faculty of Pharmacy (Girls), Al-Azhar University, Cairo, Egypt.
  - 3 Department of Pharmaceutical Organic Chemistry, Faculty of Pharmacy, Cairo University, Cairo 11562, Egypt.
  - 4 Department of Pharmaceutical Organic Chemistry, Faculty of Pharmacy, October 6 University (O6U), 6th of October city, Giza 12585, Egypt.
  - 5 Department of Pharmaceutical Organic Chemistry, College of Pharmaceutical Sciences and Drug Manufacturing, Misr University for Science and Technology (MUST), 6<sup>th</sup> of October city, Giza, Egypt.

\*Correspondence:

Dr. Amira A. Helwa

Department of Pharmaceutical Organic Chemistry, College of Pharmaceutical Sciences and Drug Manufacturing, Misr University for Science and Technology (MUST), Al-Motamayez District, P.O. Box: 77, 6<sup>th</sup> of October city, Giza, Egypt.

Email: [amira.helwa@must.edu.eg](mailto:amira.helwa@must.edu.eg)

ORCID: 0000-0002-3330-476X

Prof. Dr. Azza T. Taher

Department of Pharmaceutical Organic Chemistry, Faculty of Pharmacy, Cairo University, Cairo 11562, Egypt.

Email: [azza.shalaby@pharma.cu.edu.eg](mailto:azza.shalaby@pharma.cu.edu.eg)

### Spectral data of compound 1

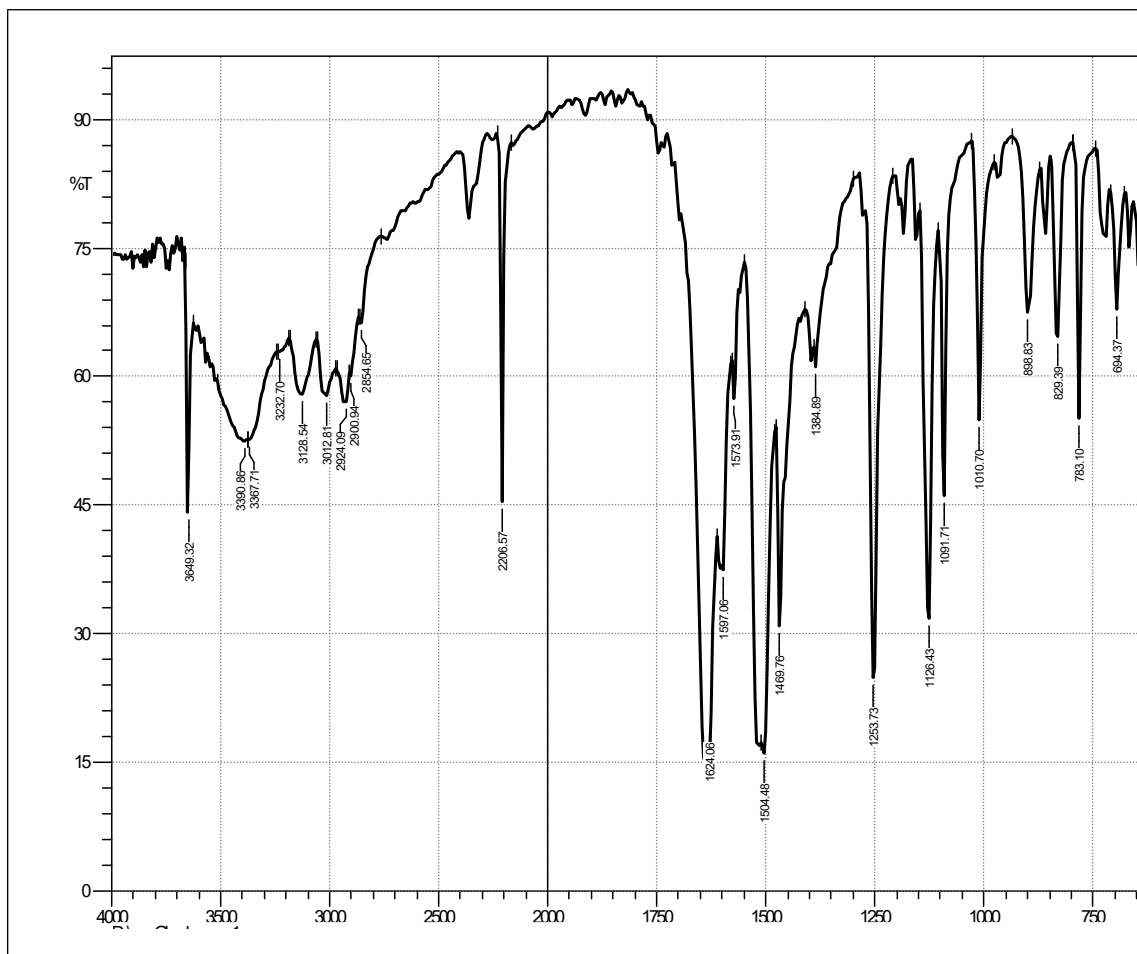

## Spectral data of compound 2

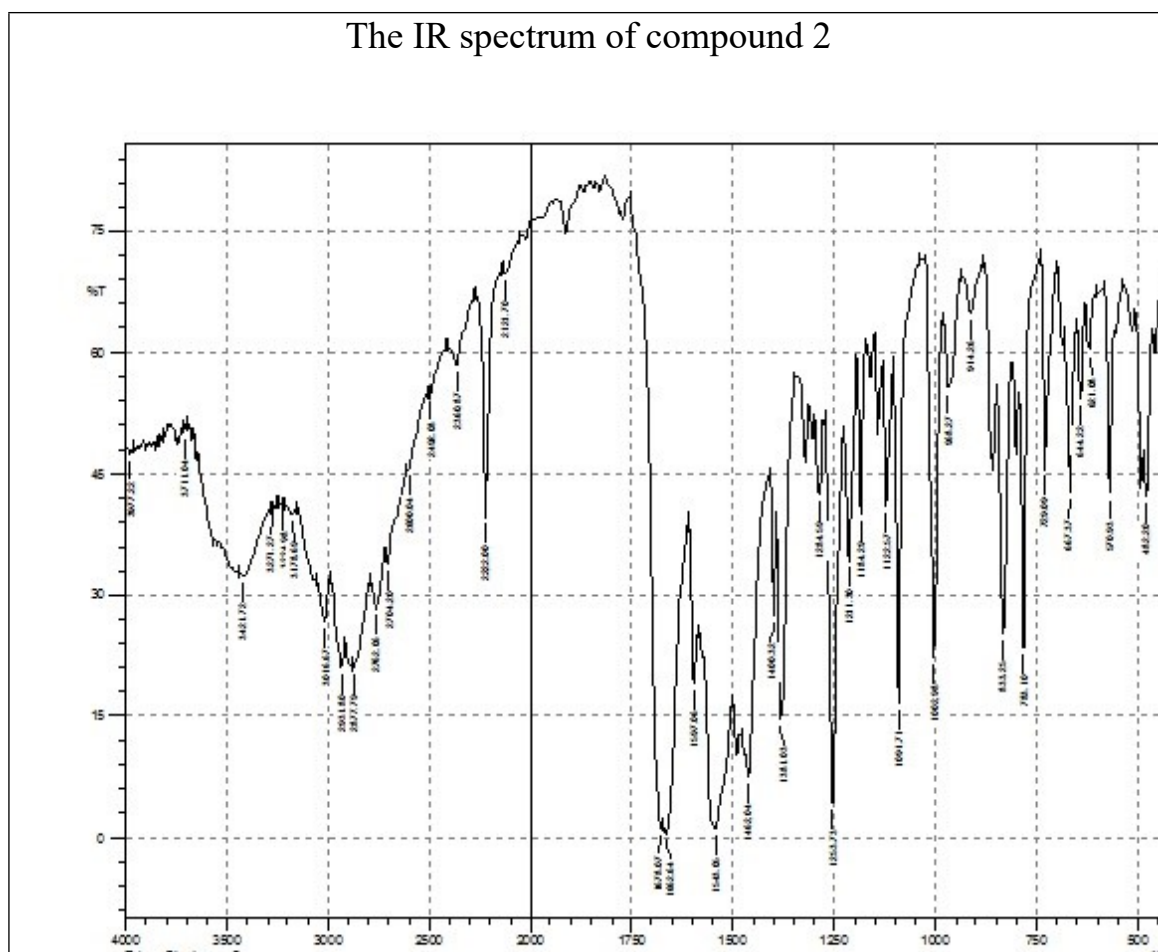

## Spectral data of compound 3

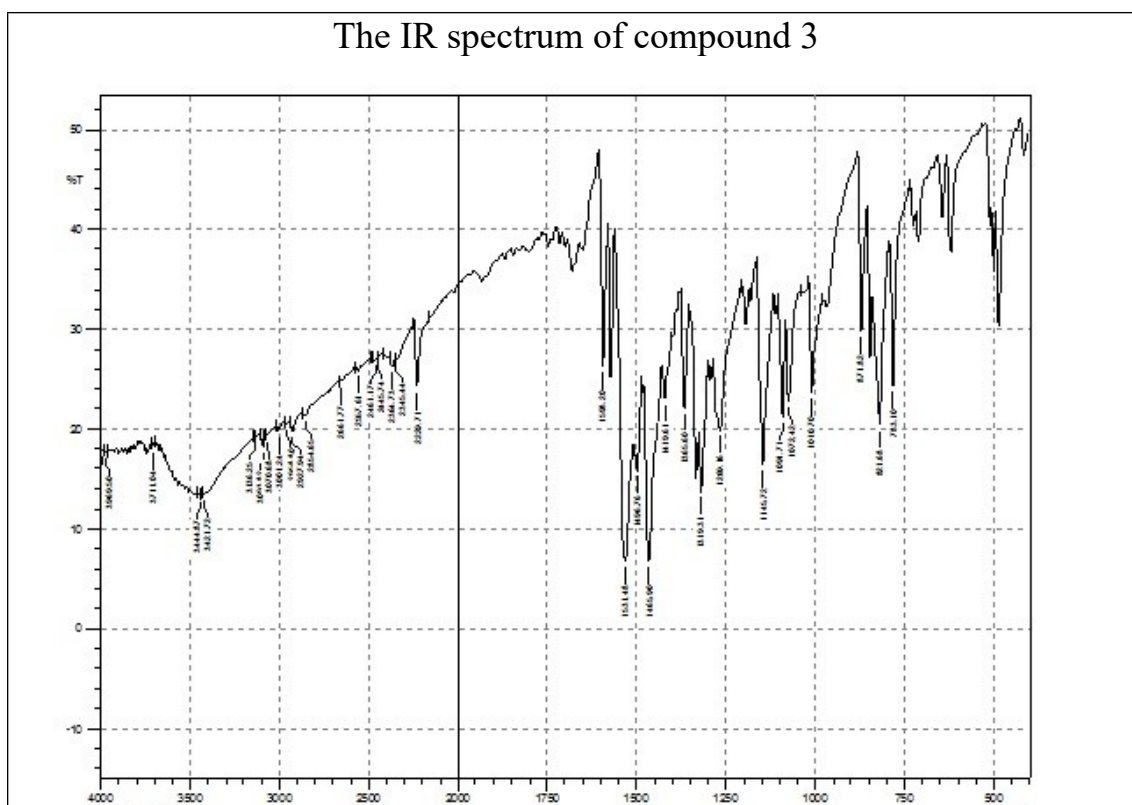

## Spectral data of compound 4

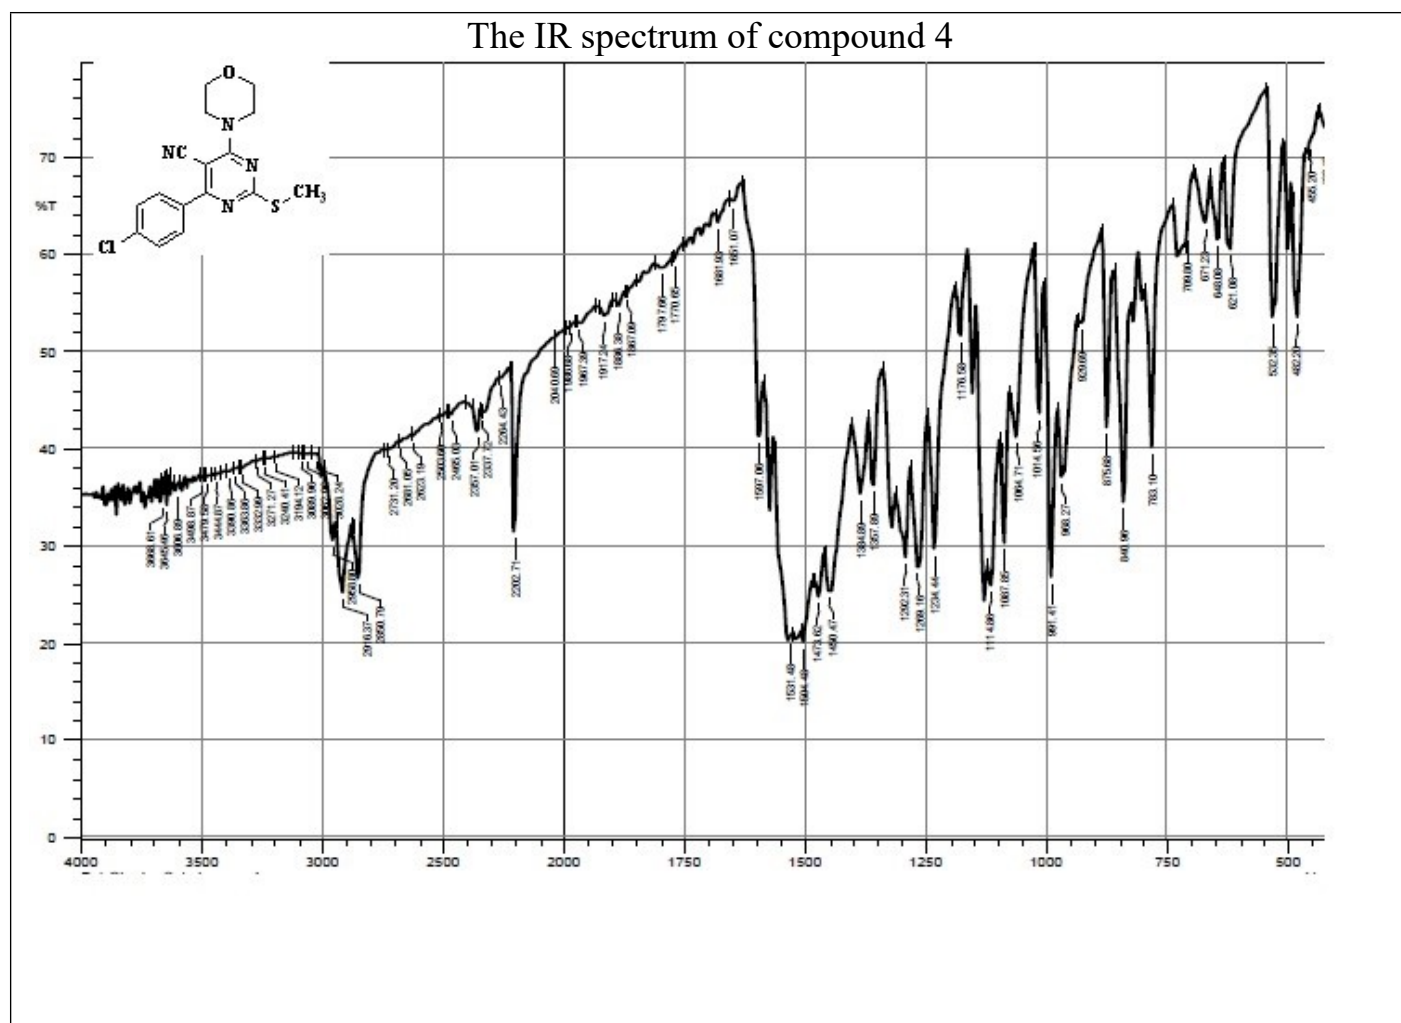

# The <sup>1</sup>H NMR spectrum of compound 4

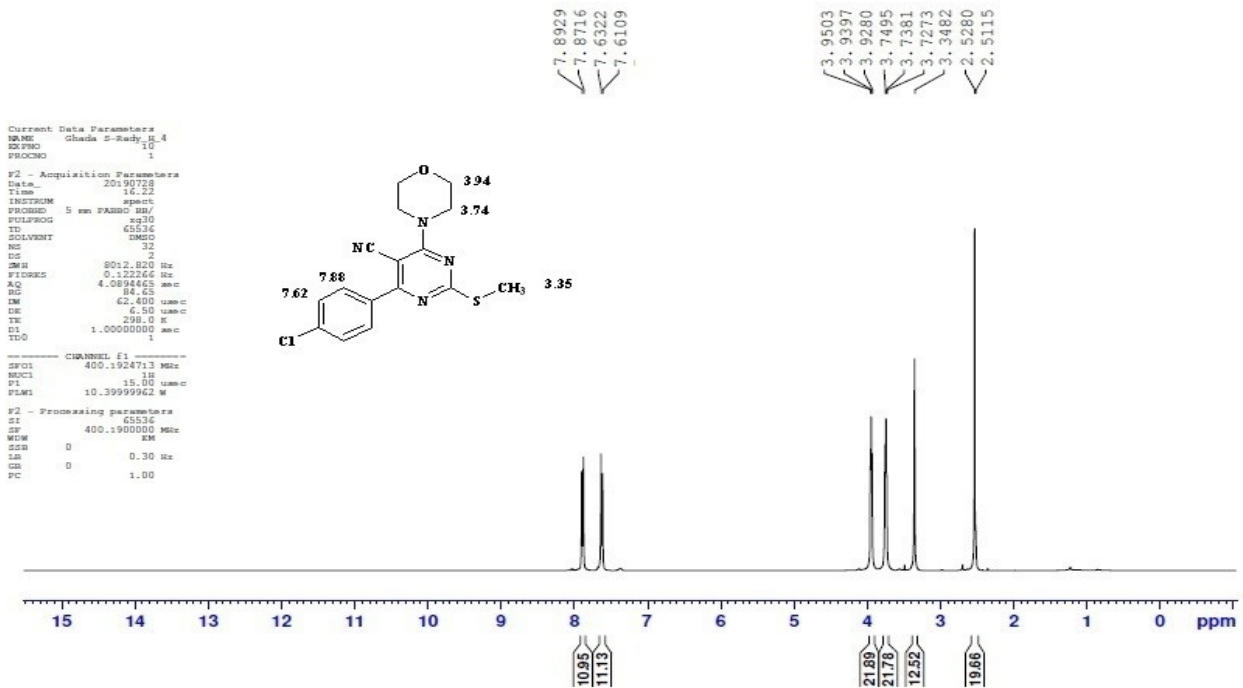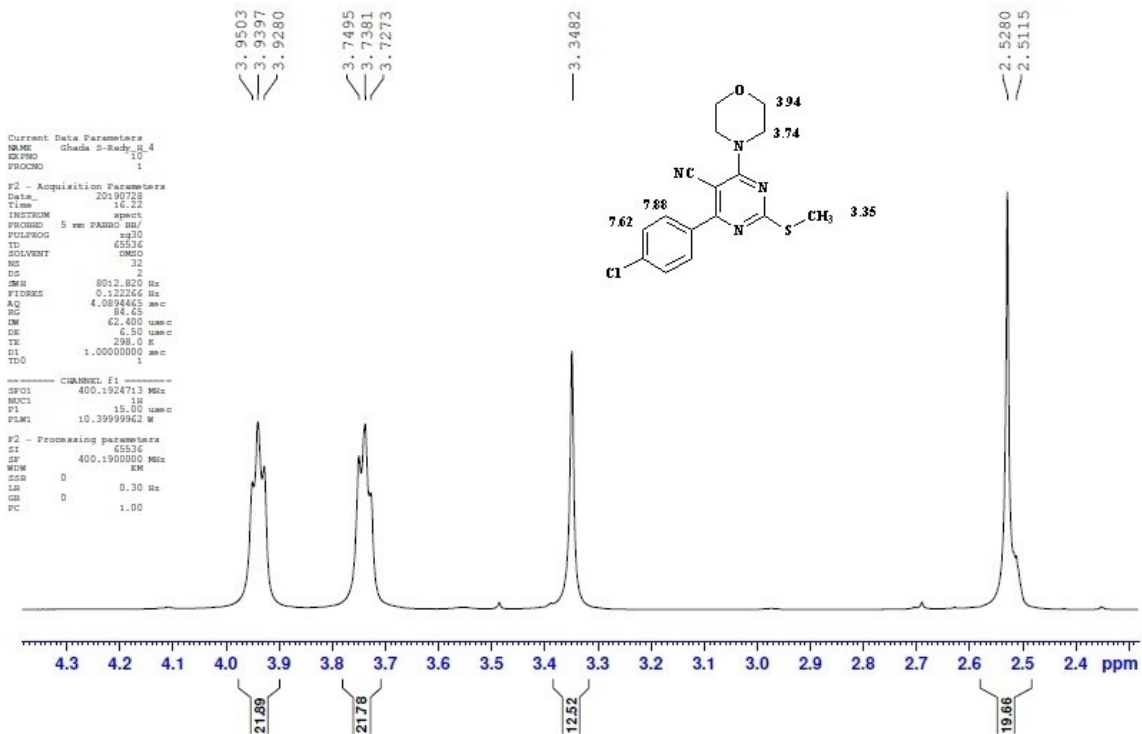

Current Data Parameters  
 NAME: Chada 2-2ndy\_4  
 EXPNO: 10  
 PROCNO: 1

F2 - Acquisition Parameters  
 Date\_: 20190728  
 Time: 16.22  
 INSTRUM: spect  
 PROBRW: 5 mm PABBO HB/  
 PULPROG: zg30  
 TD: 65536  
 SOLVENT: DMSO  
 NS: 32  
 DS: 2  
 SWH: 8012.800 Hz  
 FIDRES: 0.122266 Hz  
 AQ: 4.0894465 sec  
 RG: 84.65  
 IM: 62.400 usec  
 DE: 6.50 usec  
 TE: 298.0 K  
 D1: 1.00000000 sec  
 TSD: 1

----- CHANNEL F1 -----  
 SFO1: 400.1924713 MHz  
 NUC1: 1H  
 P1: 15.00 usec  
 PLW1: 10.39999962 W

F2 - Processing parameters  
 SI: 65536  
 SF: 400.1900000 MHz  
 WDW: EM  
 SSB: 0  
 LB: 0.30 Hz  
 GB: 0  
 PC: 1.00

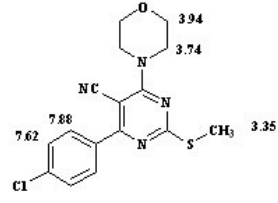

7.8929  
 7.8716

7.6322  
 7.6109

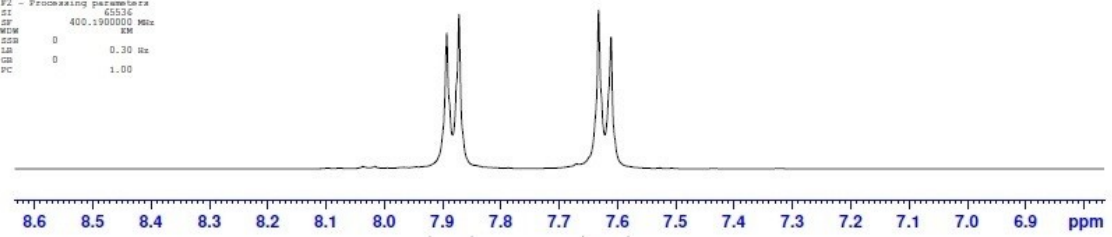

10.95

11.13

# The <sup>13</sup>C NMR spectrum of compound 4

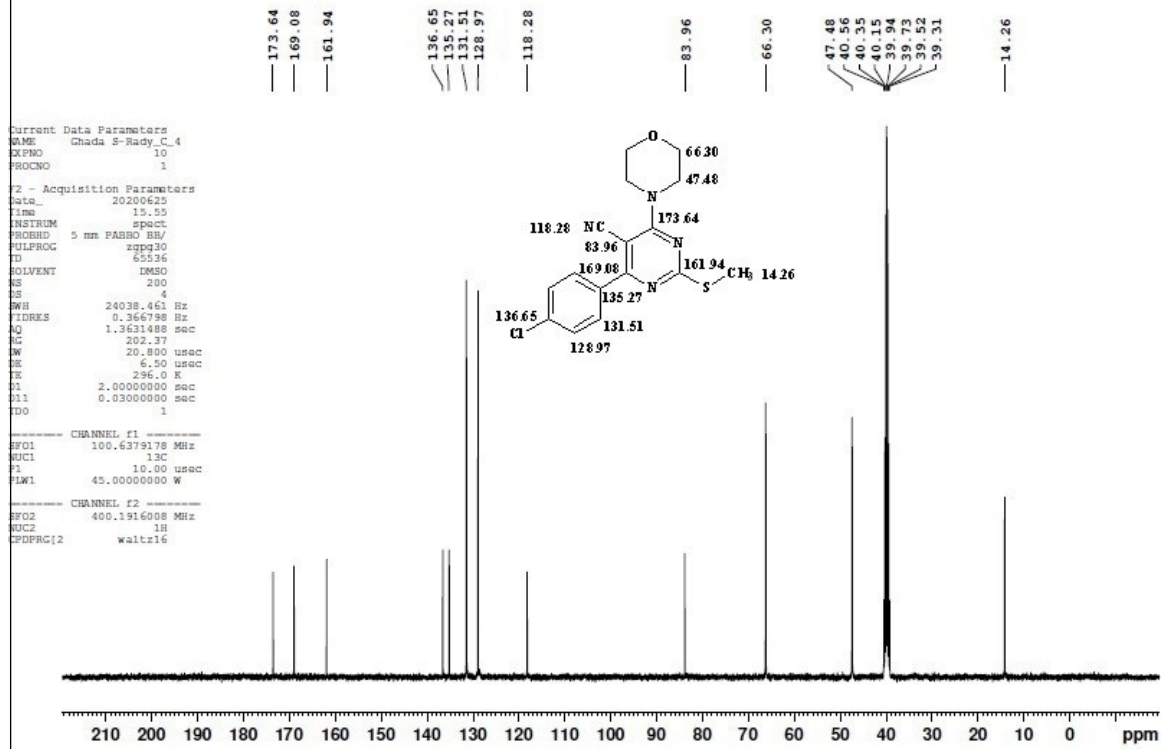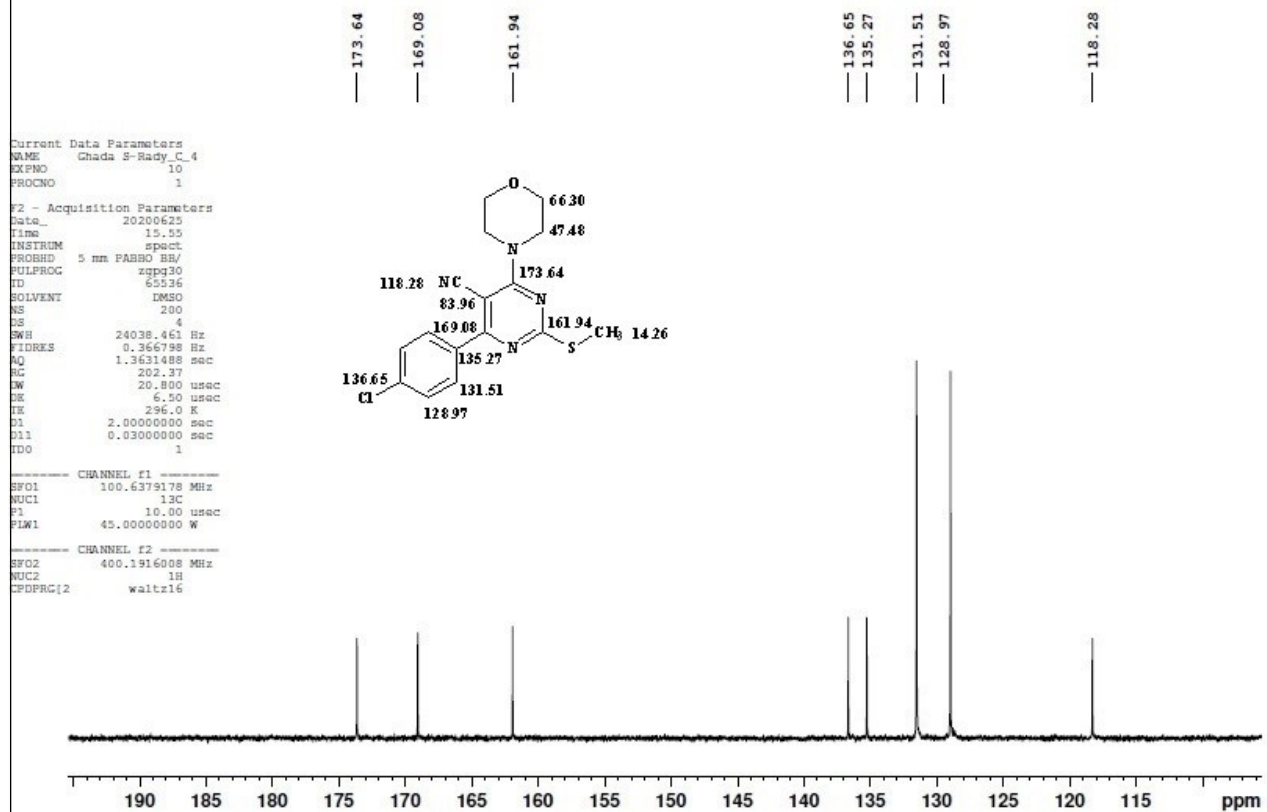



# The mass spectrum of compound 4

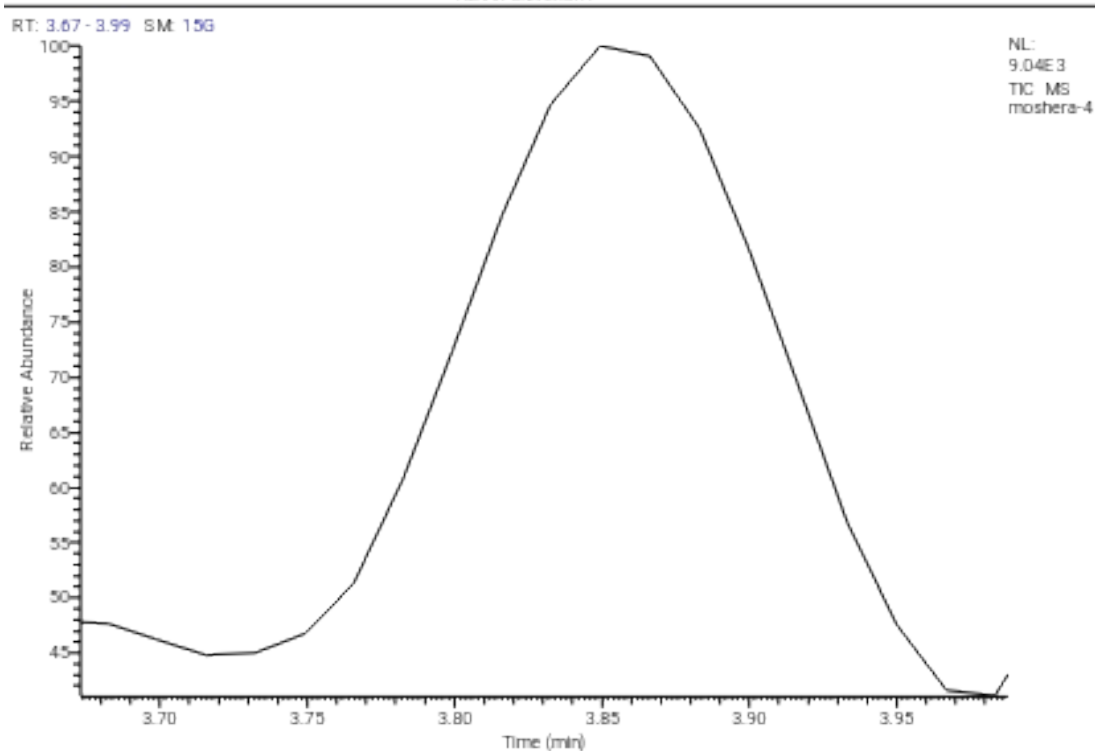

moshera-4 #279 RT: 4.09 AV: 1 SB: 2 4.45, 4.45 NL: 0.59E2  
T: {0,0} + c EI Full ms [40.00-1000.00]

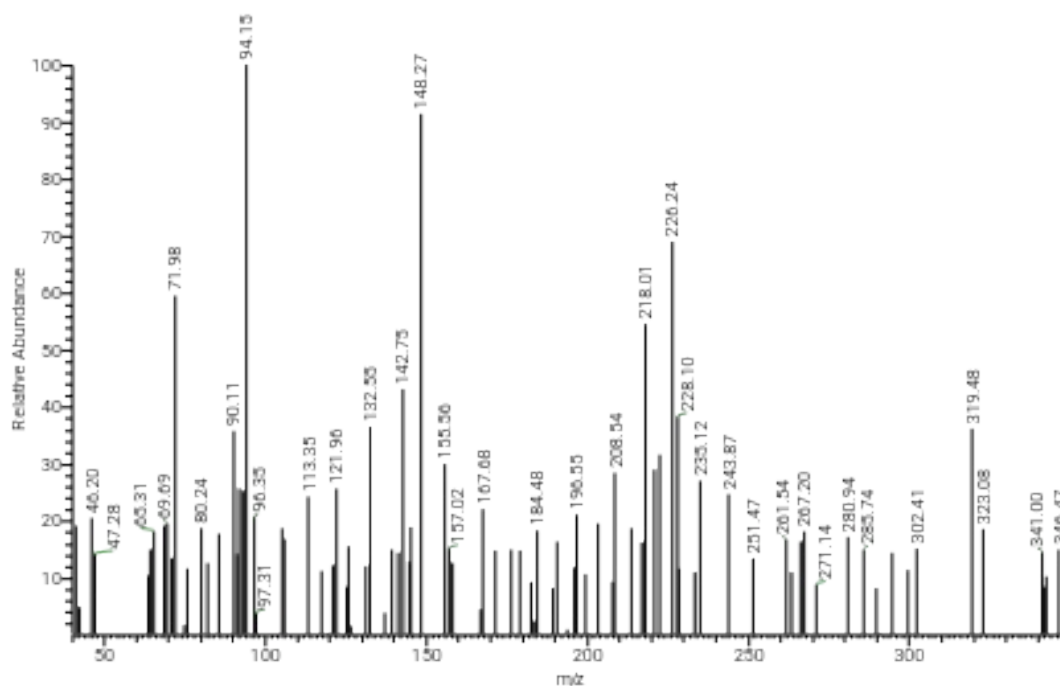

## Spectral data of compound 5

### The IR spectrum of compound 5

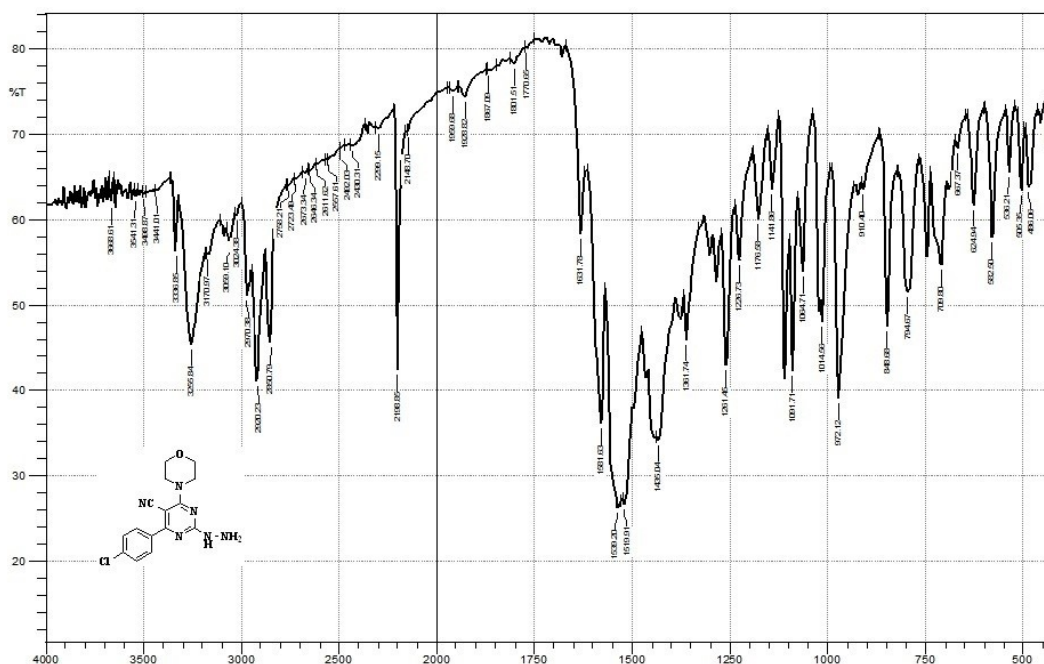

### The <sup>1</sup>H NMR spectrum of compound 5

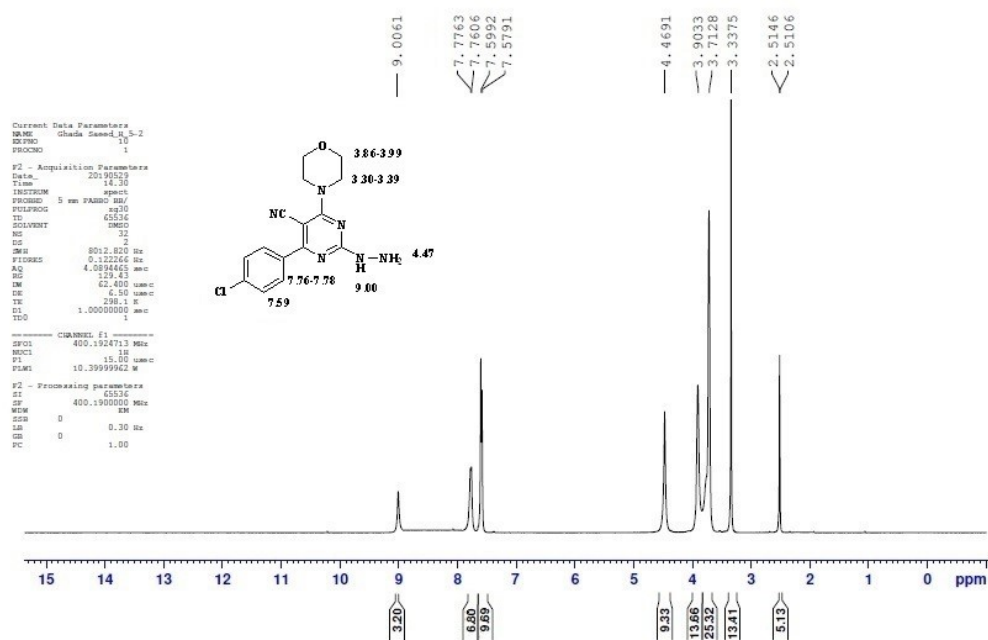

Current Data Parameters  
 NAME Ghada Saad\_H\_5-2  
 EXPNO 10  
 PROCNO 1

F2 - Acquisition Parameters  
 Date\_ 20190529  
 Time 14.30  
 INSTRUM spect  
 PROBRD 5 mm PABBO BH/  
 PULPROG zg30  
 TD 65536  
 SOLVENT DMSO  
 NS 32  
 DS 2  
 SWH 8012.820 Hz  
 FIDRES 0.122266 Hz  
 AQ 4.0894865 sec  
 RG 329.83  
 DW 62.400 usec  
 DE 6.50 usec  
 TE 298.1 K  
 D1 1.0000000 sec  
 TDO 1

----- CHANNEL f1 -----  
 SFOL 400.1924713 MHz  
 NUC1 1H  
 P1 15.00 usec  
 PLW1 10.39999962 W

F2 - Processing parameters  
 SI 65536  
 SF 400.1900000 MHz  
 WFM EM  
 SSB 0  
 LB 0.30 Hz  
 GB 0  
 PC 1.00

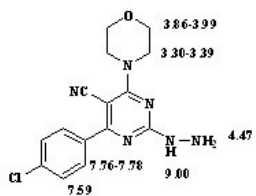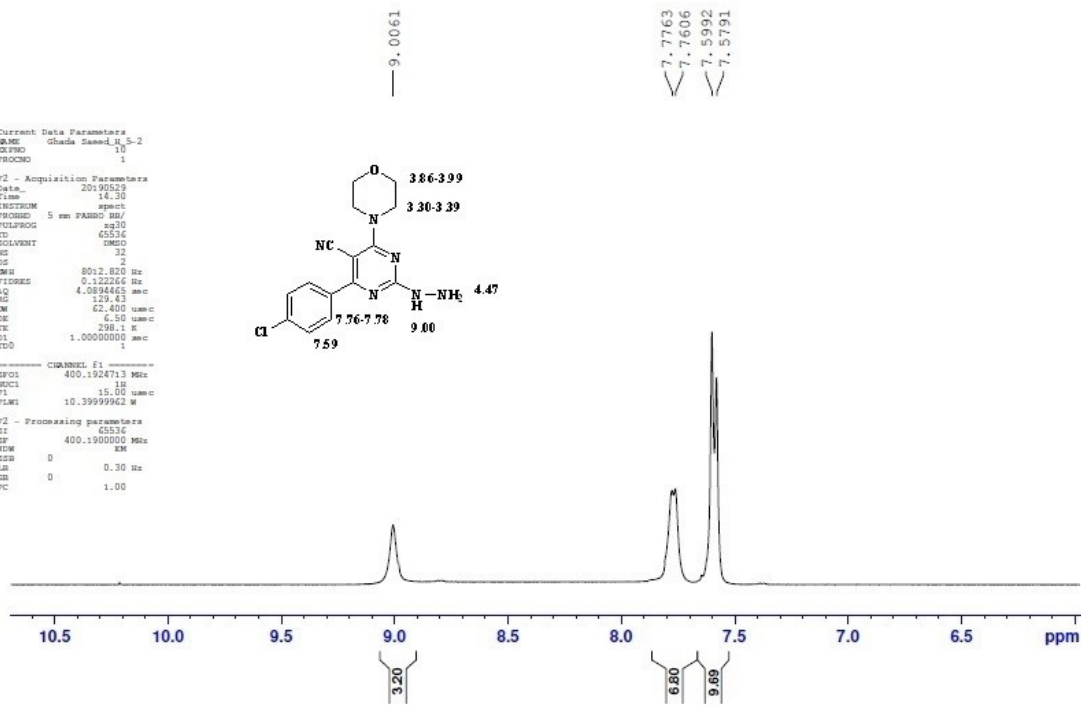

D2O

Current Data Parameters  
 NAME Ghada Saad\_H\_5-2\_D2O  
 EXPNO 10  
 PROCNO 1

F2 - Acquisition Parameters  
 Date\_ 20190530  
 Time 13.28  
 INSTRUM spect  
 PROBRD 5 mm PABBO BH/  
 PULPROG zg30  
 TD 65536  
 SOLVENT DMSO  
 NS 32  
 DS 2  
 SWH 8012.820 Hz  
 FIDRES 0.122266 Hz  
 AQ 4.0894865 sec  
 RG 329.83  
 DW 62.400 usec  
 DE 6.50 usec  
 TE 298.0 K  
 D1 1.0000000 sec  
 TDO 1

----- CHANNEL f1 -----  
 SFOL 400.1924713 MHz  
 NUC1 1H  
 P1 15.00 usec  
 PLW1 10.39999962 W

F2 - Processing parameters  
 SI 65536  
 SF 400.1900000 MHz  
 WFM EM  
 SSB 0  
 LB 0.30 Hz  
 GB 0  
 PC 1.00

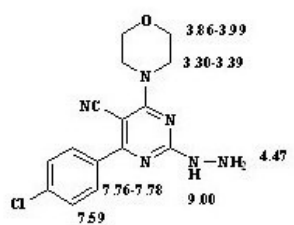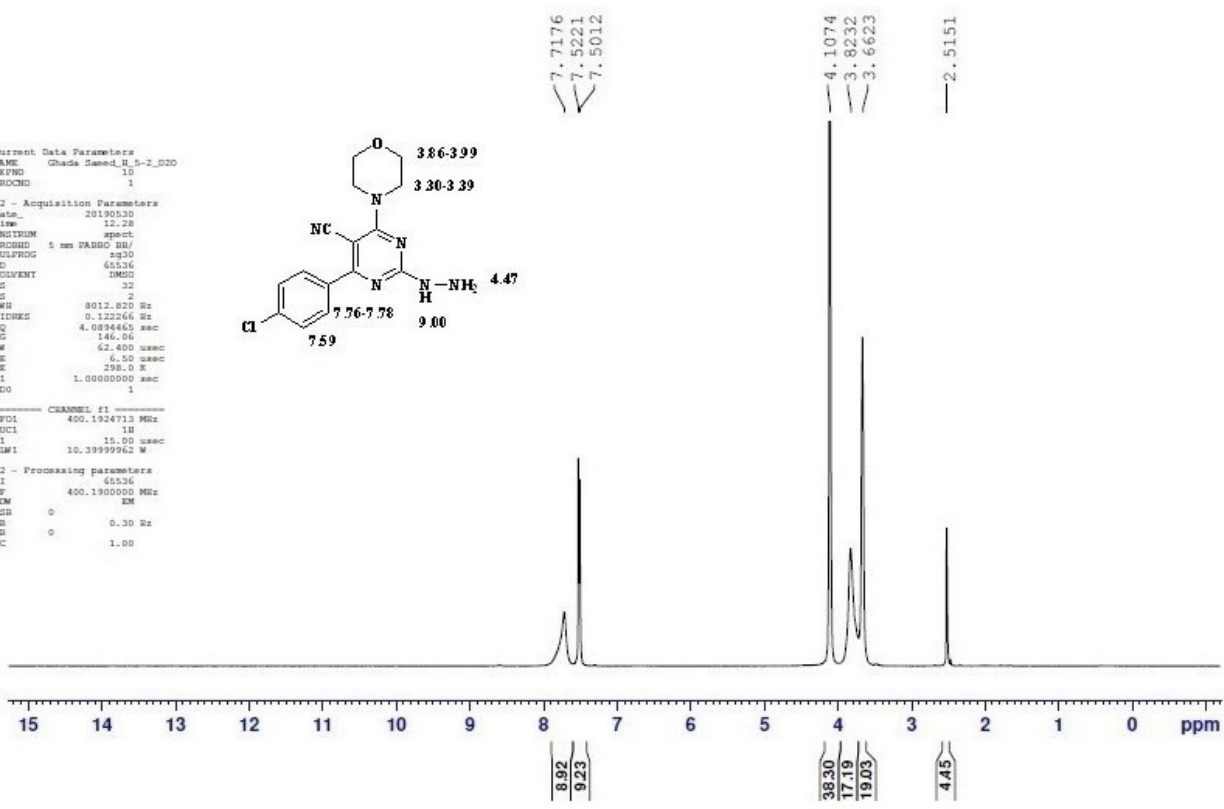

D2O

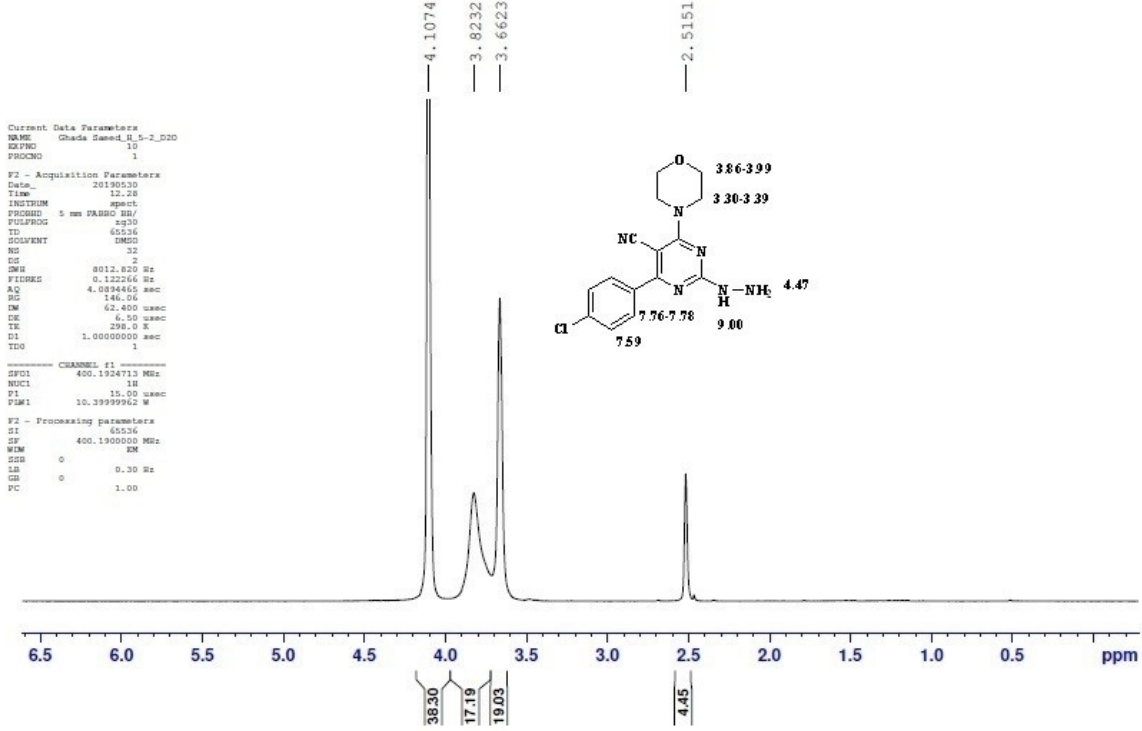

D2O

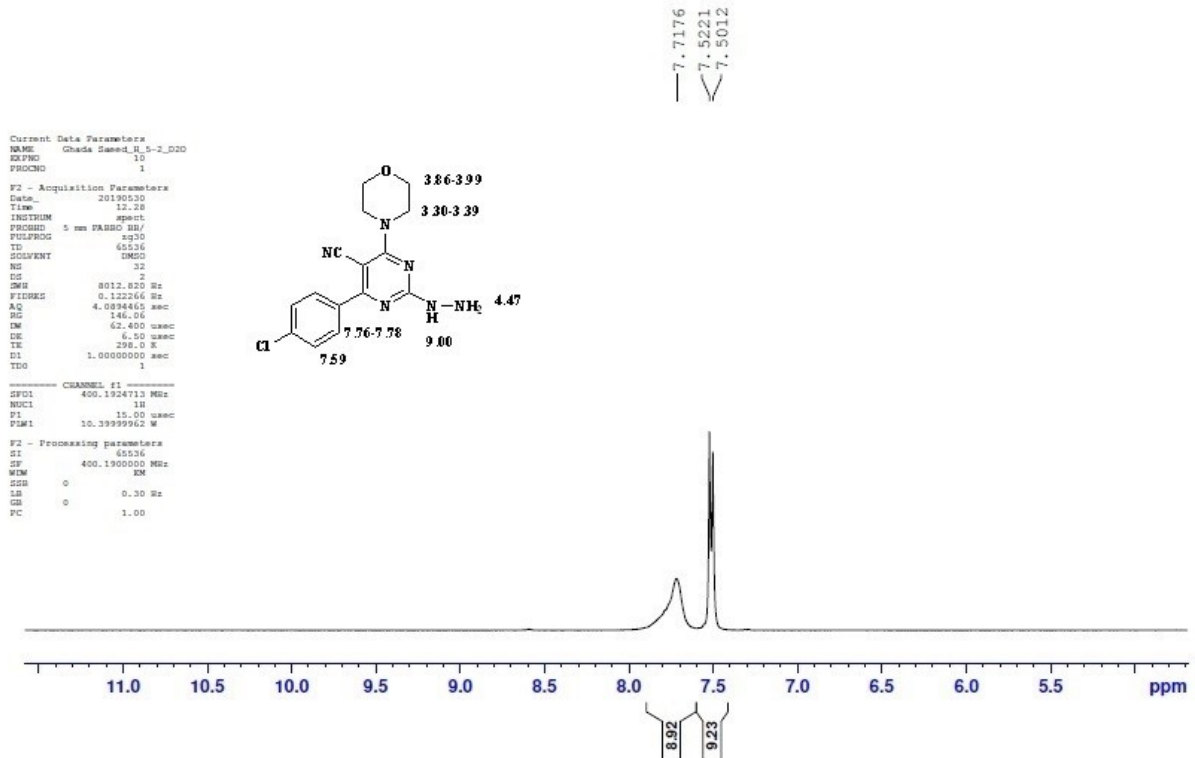

# The <sup>13</sup>C NMR spectrum of compound 5

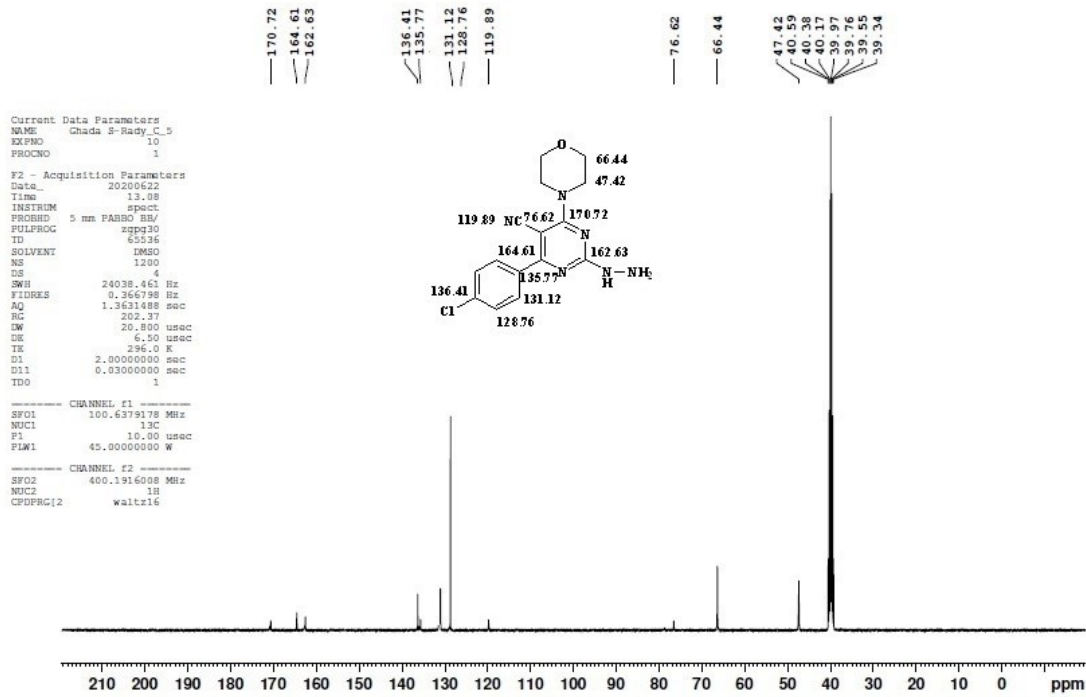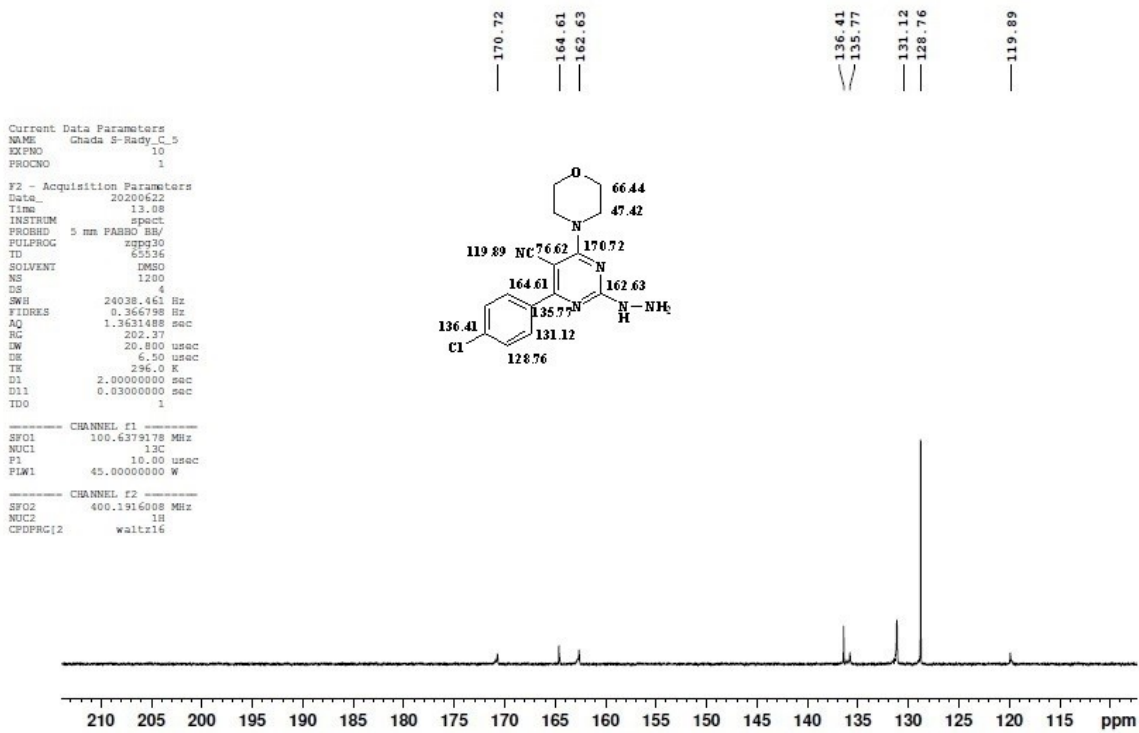

# The mass spectrum of compound 5

RT: 2.29 - 2.75 SM: 15G

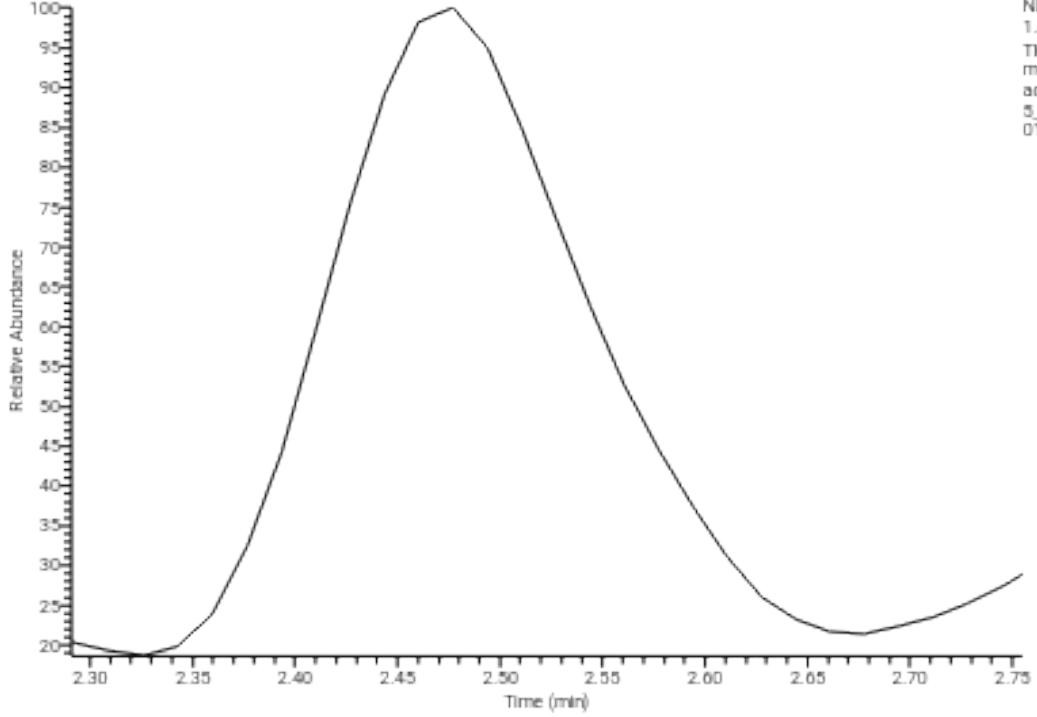

moshera-ade1-5\_200729101817 #99, RT: 1.67 AV: 1 SB: 2 4.45, 4.45 NL: 3.68E2  
T: {0,0} + c EI Full ms [40.00-1000.00]

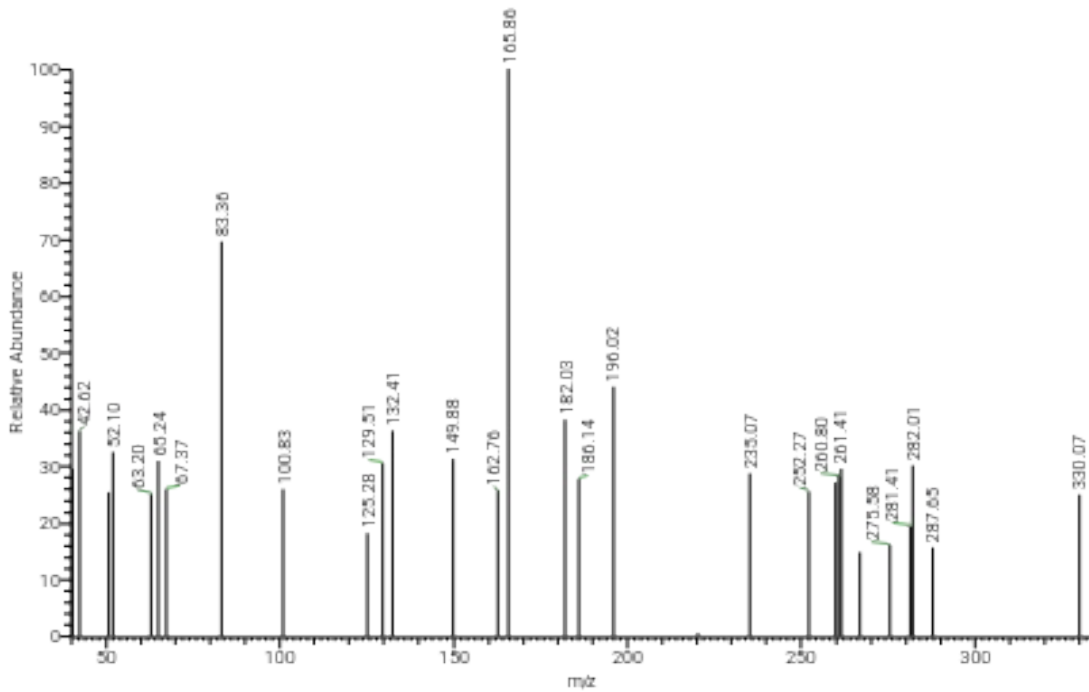

# Spectral data of compound 6

## The IR spectrum of compound 6

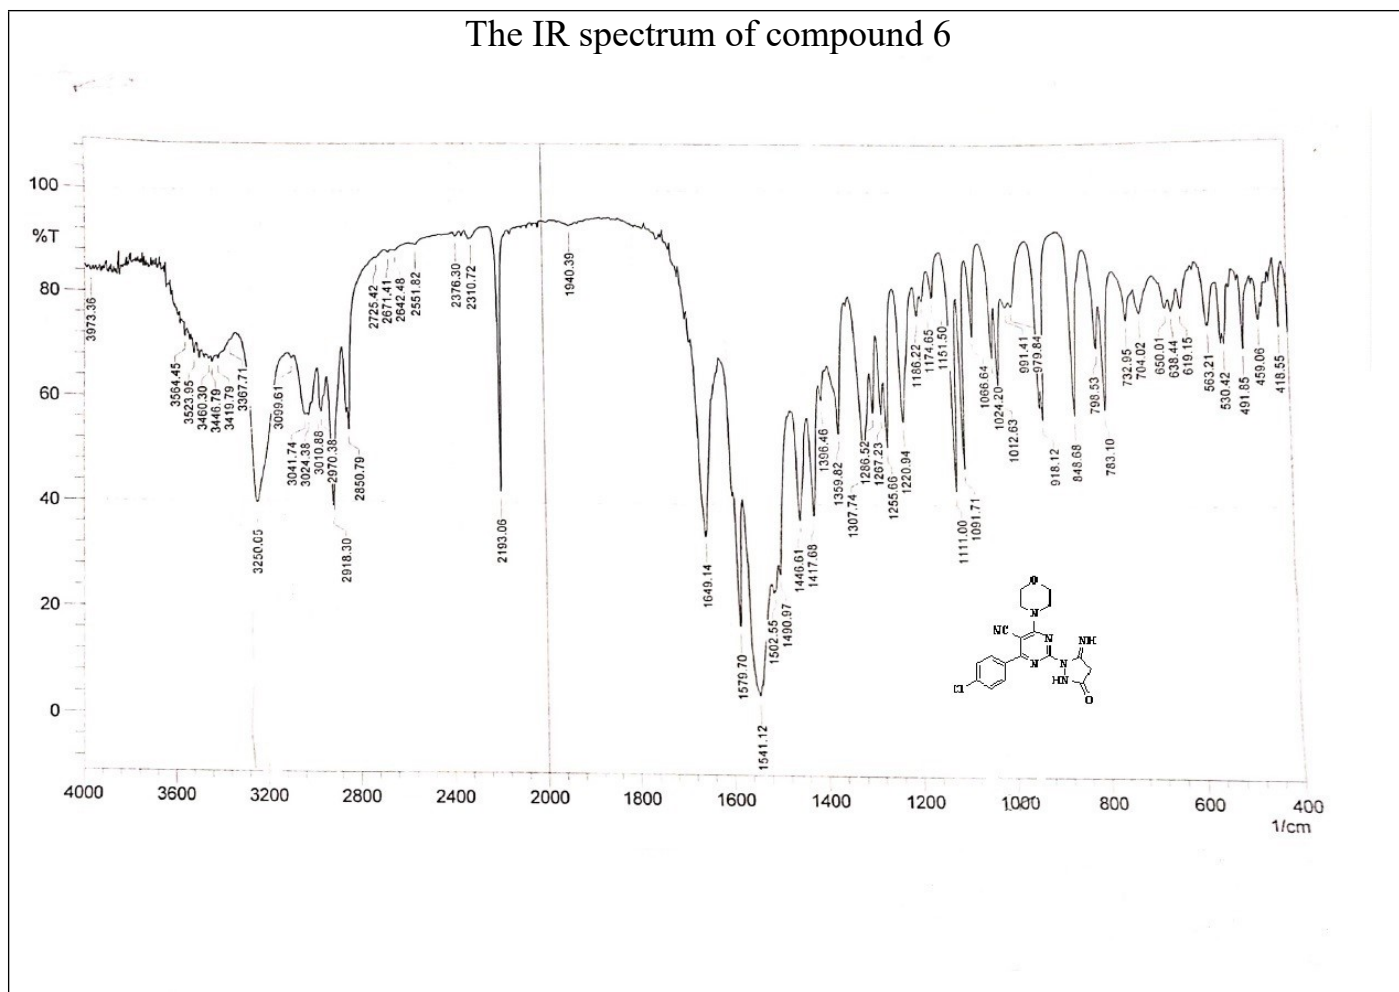

# The <sup>1</sup>H NMR spectrum of compound 6

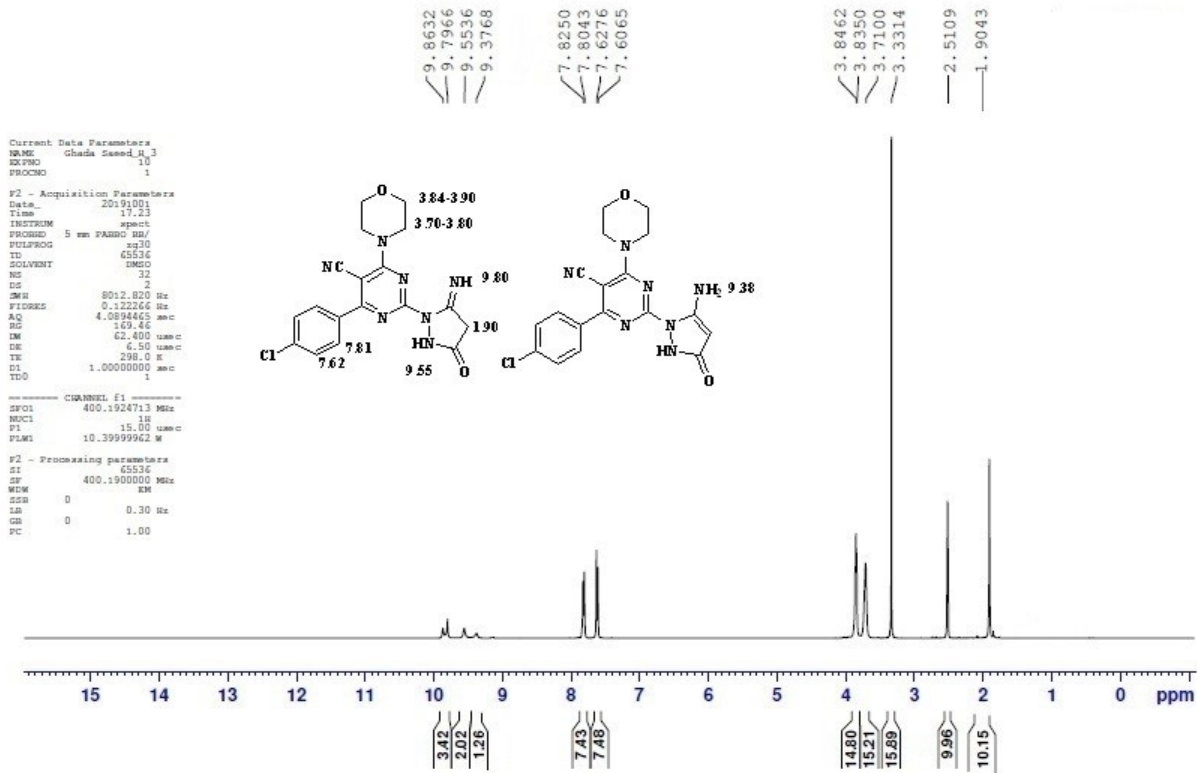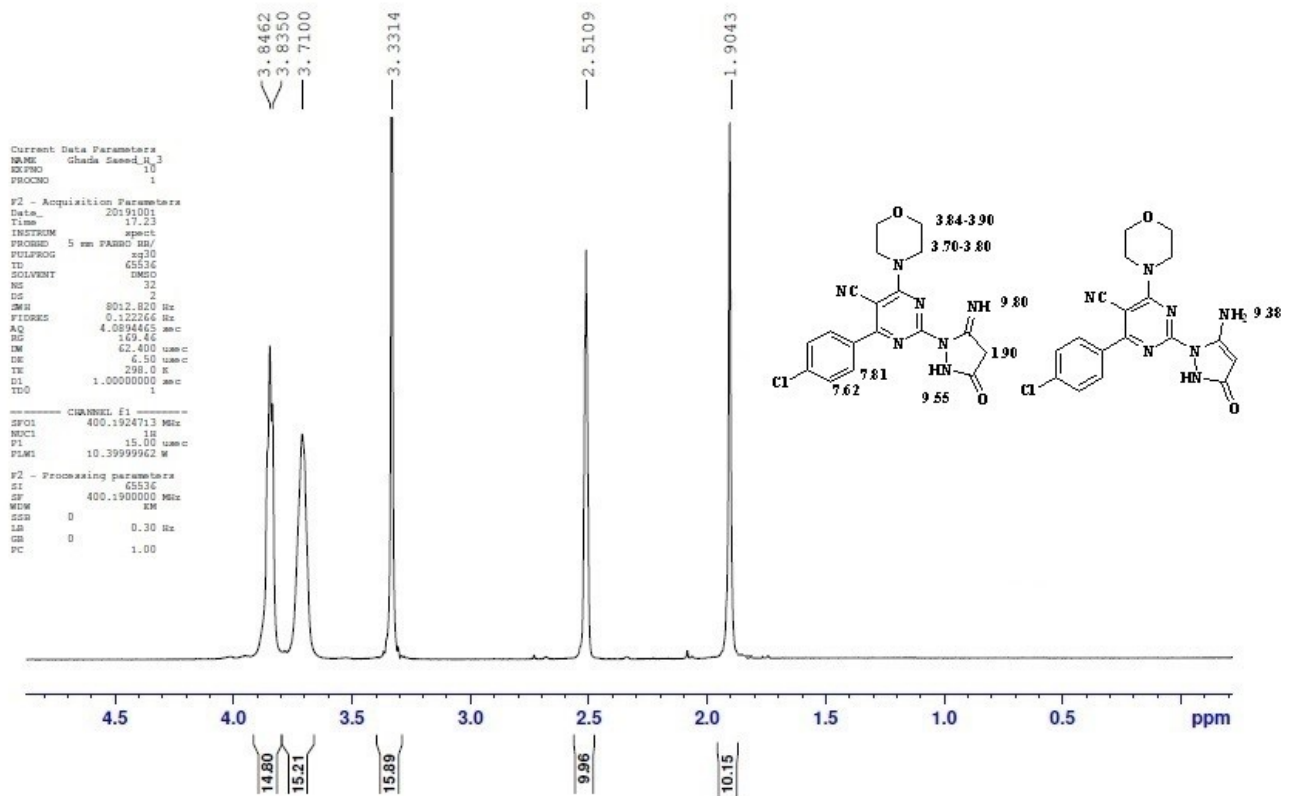



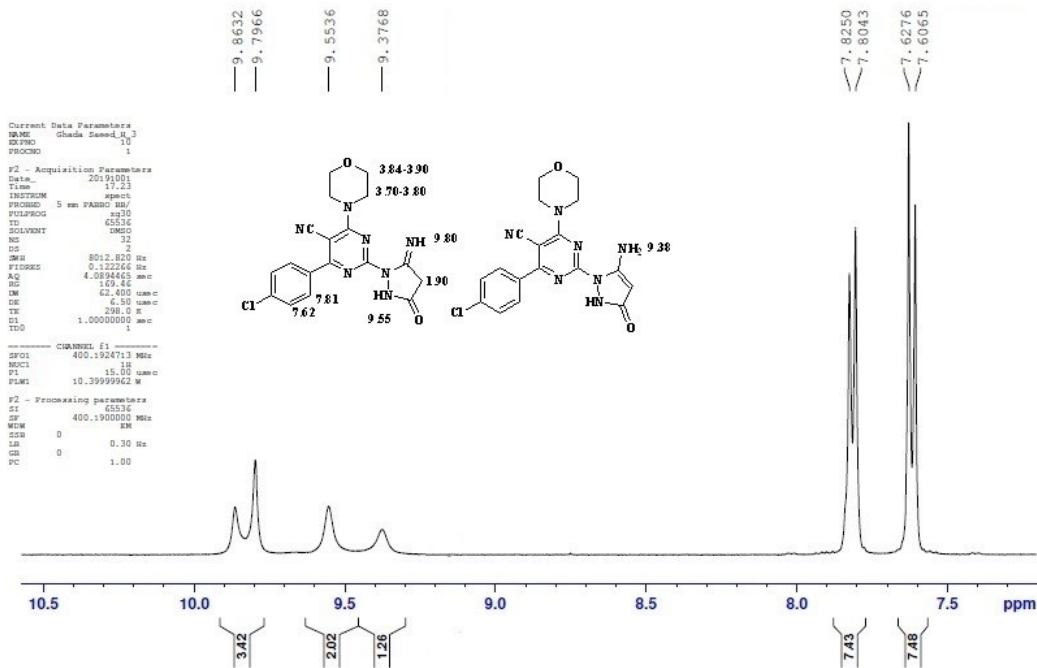

D2O

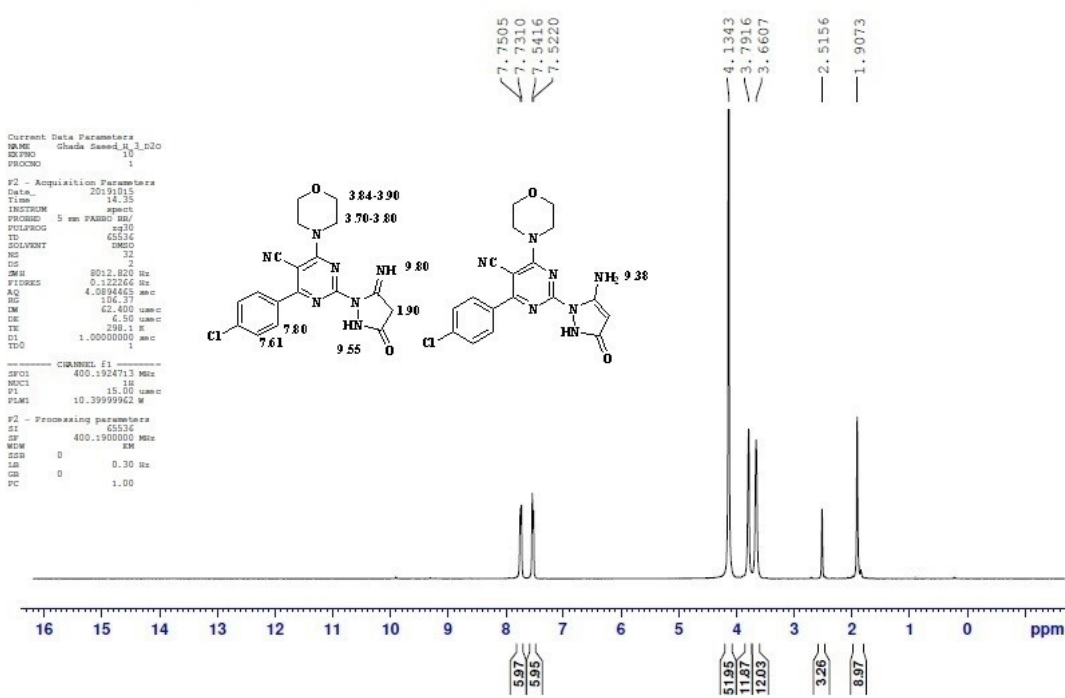

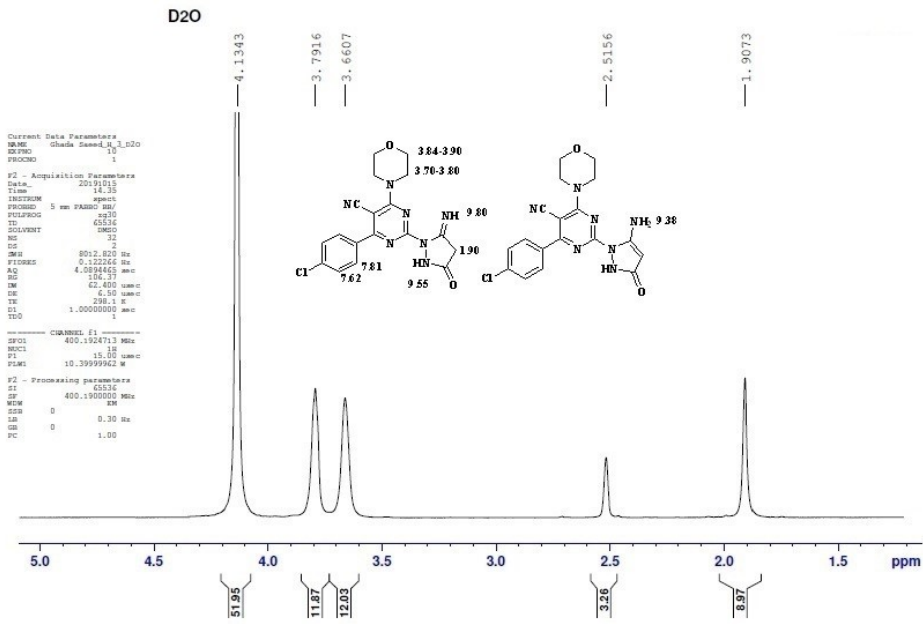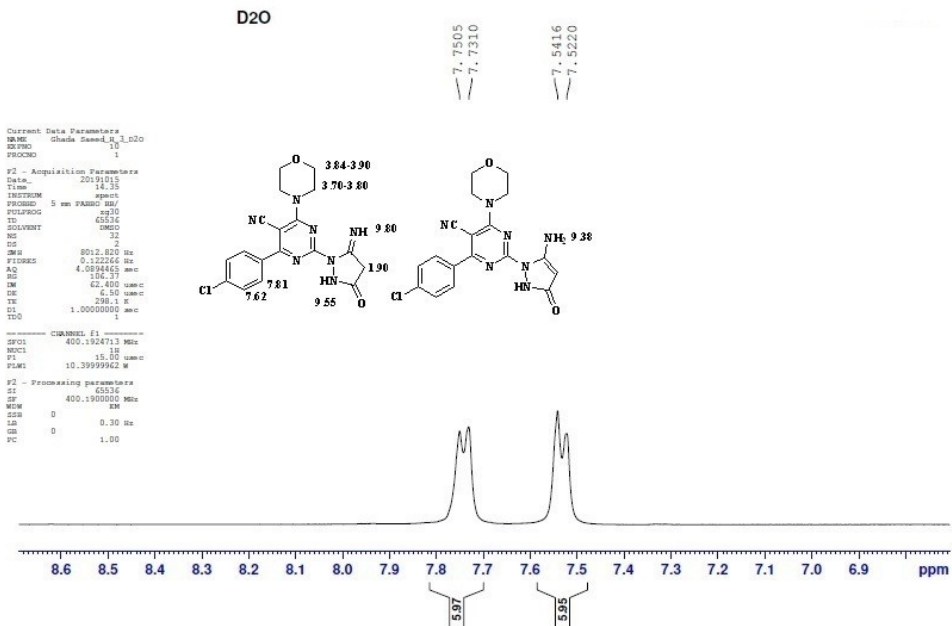

# The <sup>13</sup>C NMR spectrum of compound 6

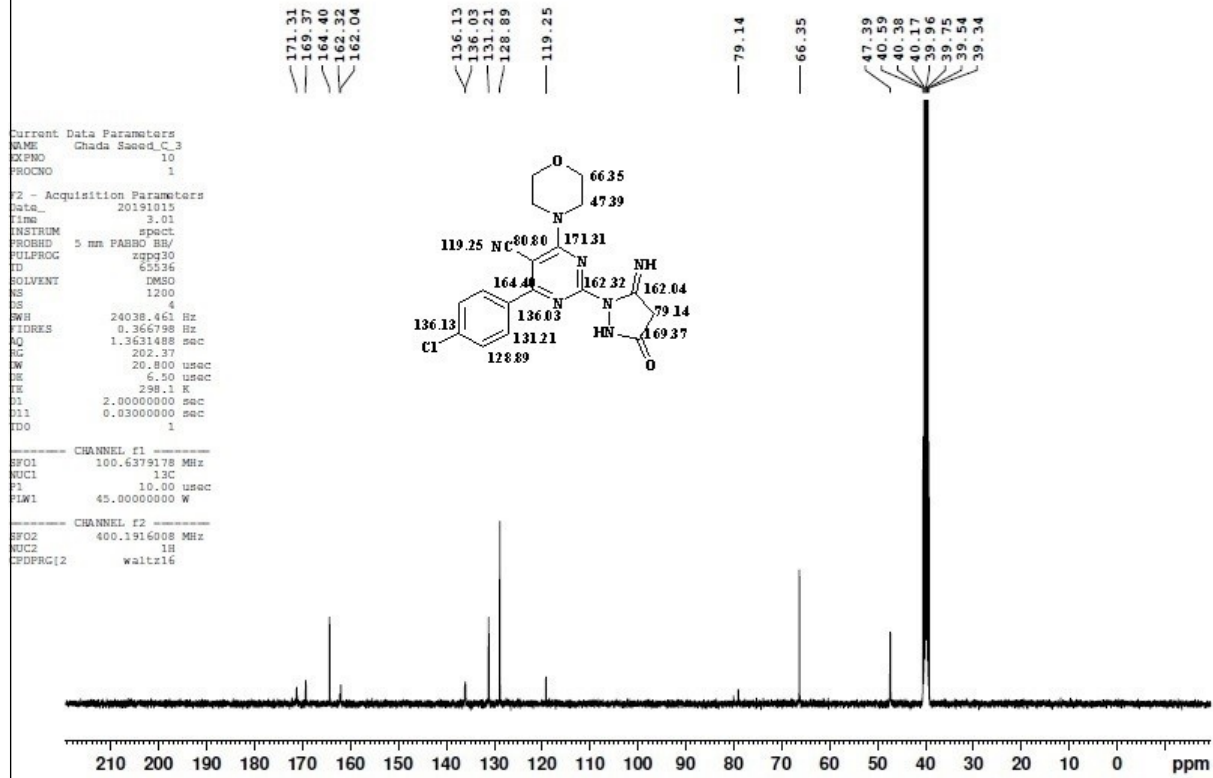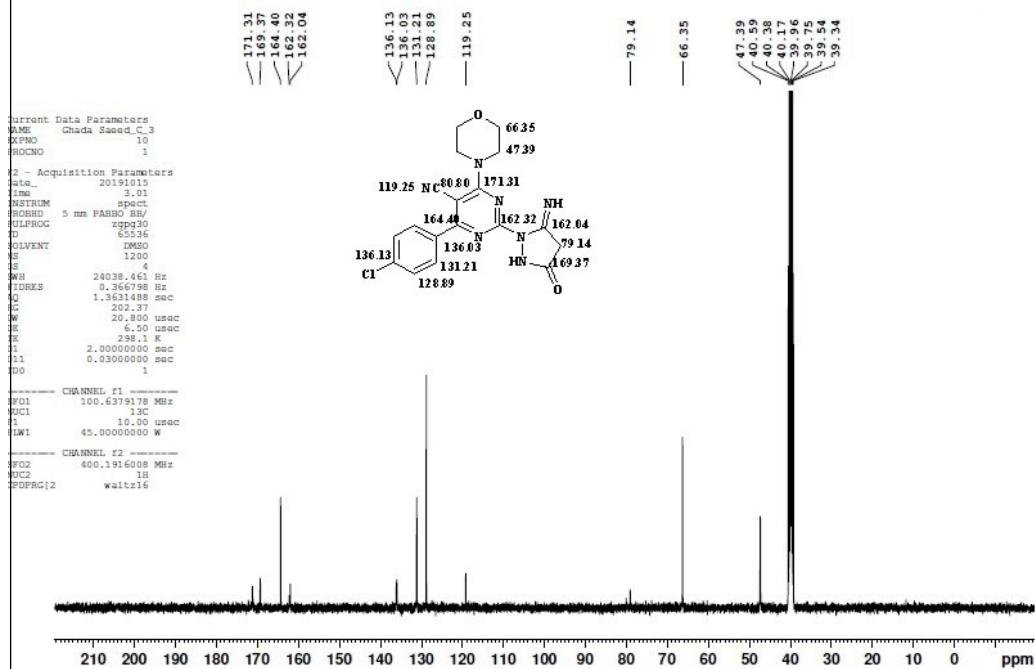

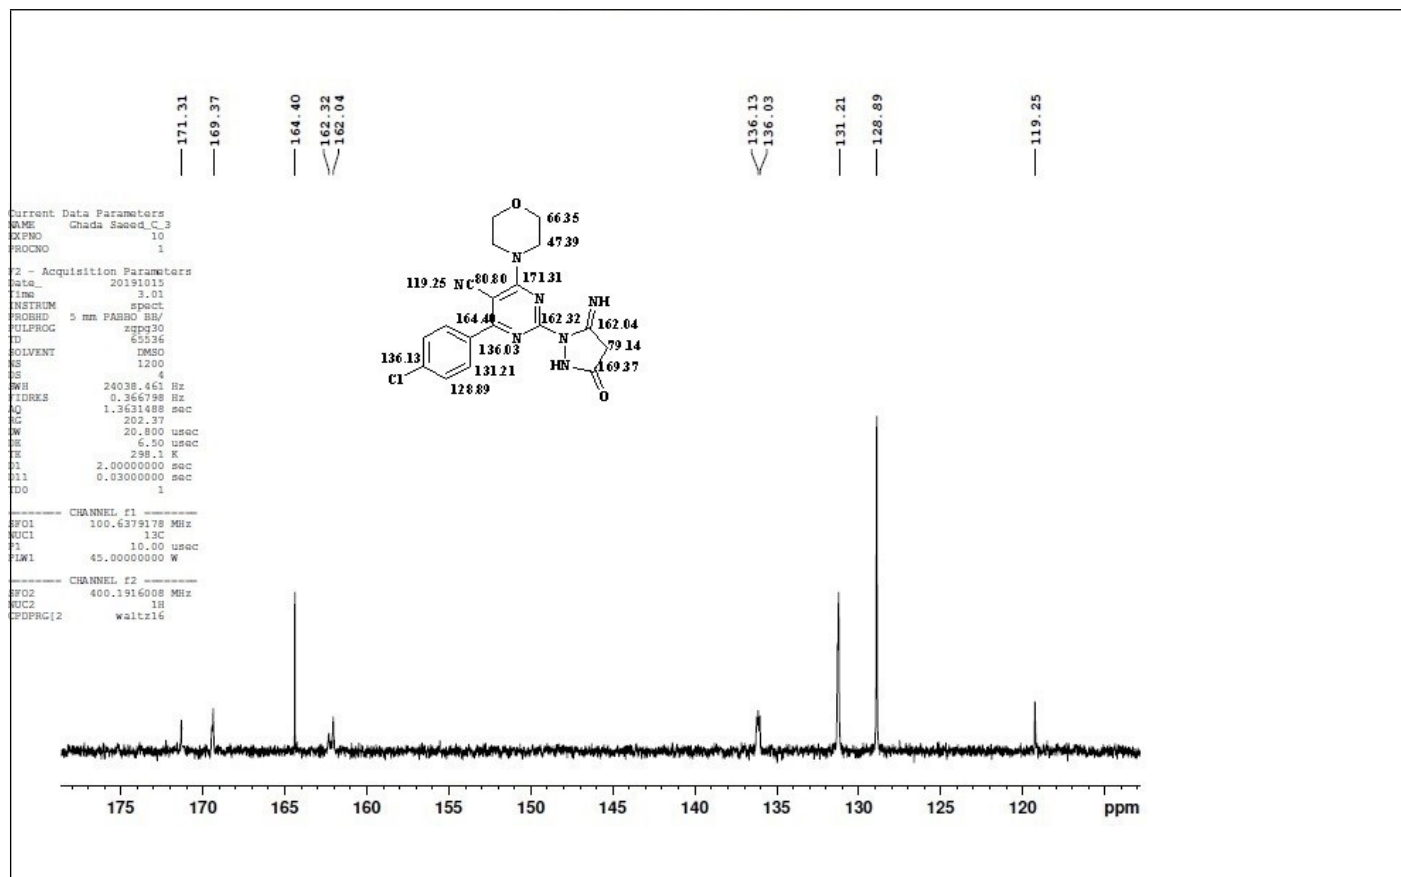

# The mass spectrum of compound 6

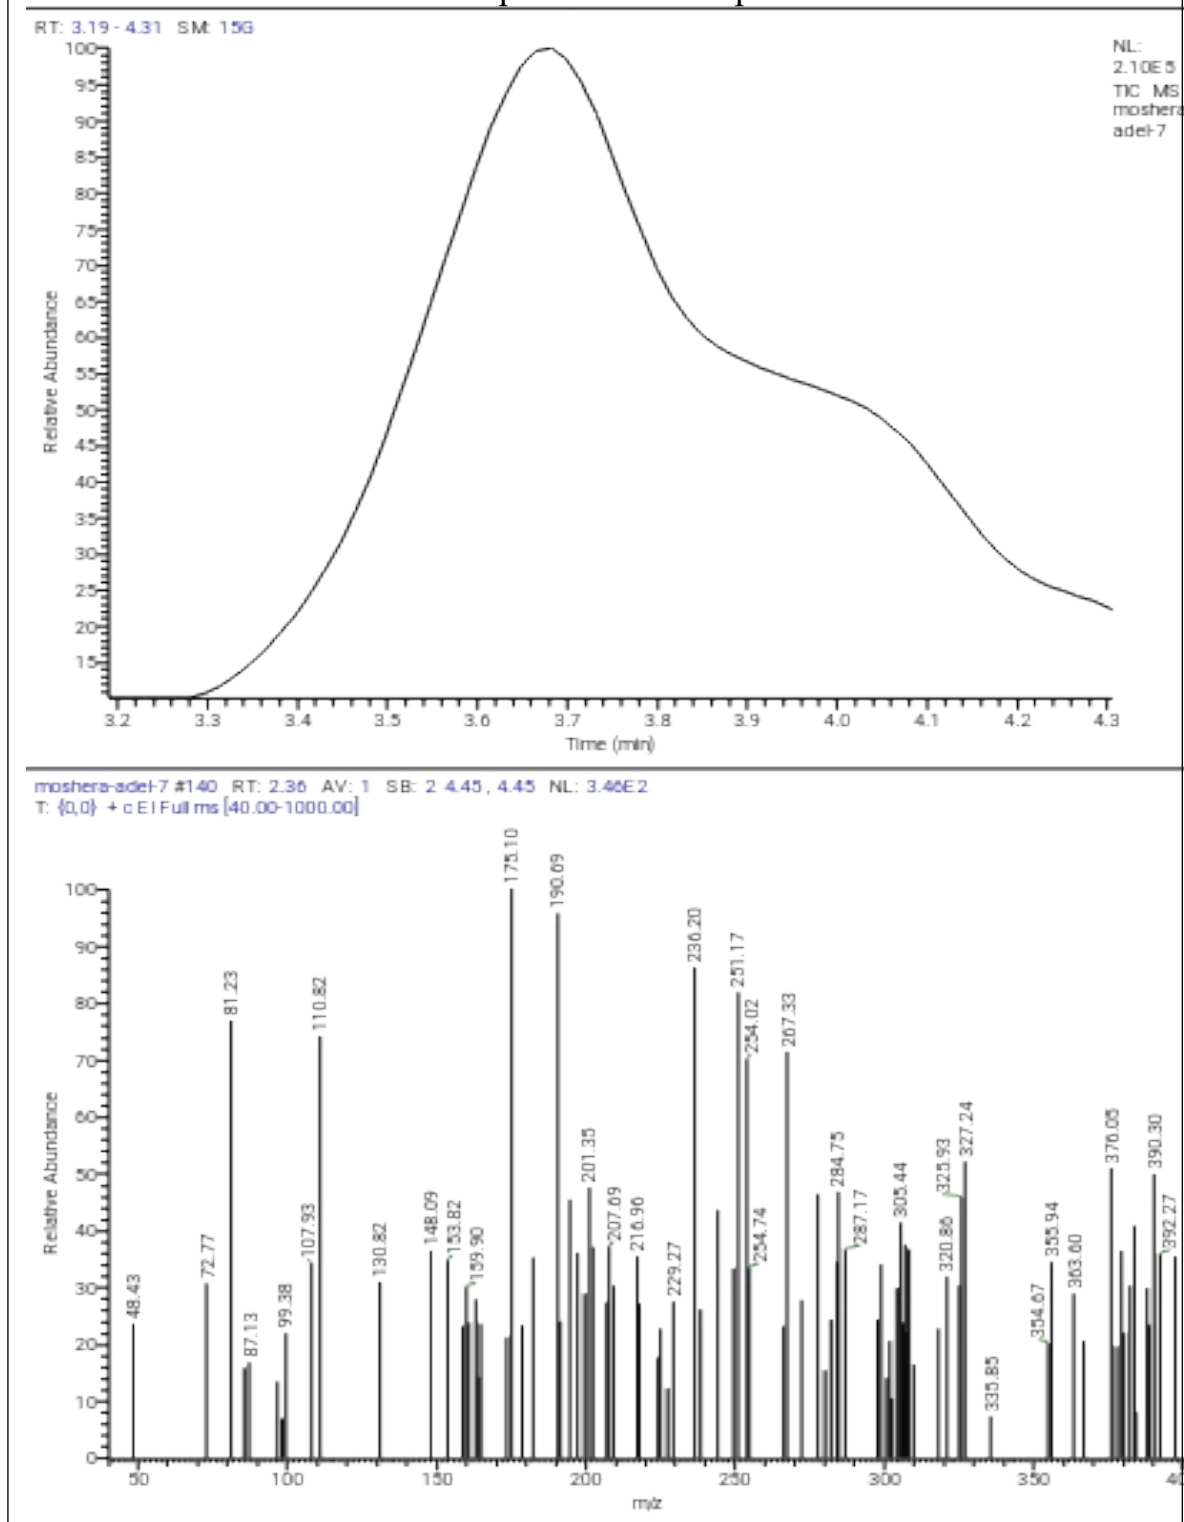

## Spectral data of compound 7

### The IR spectrum of compound 7

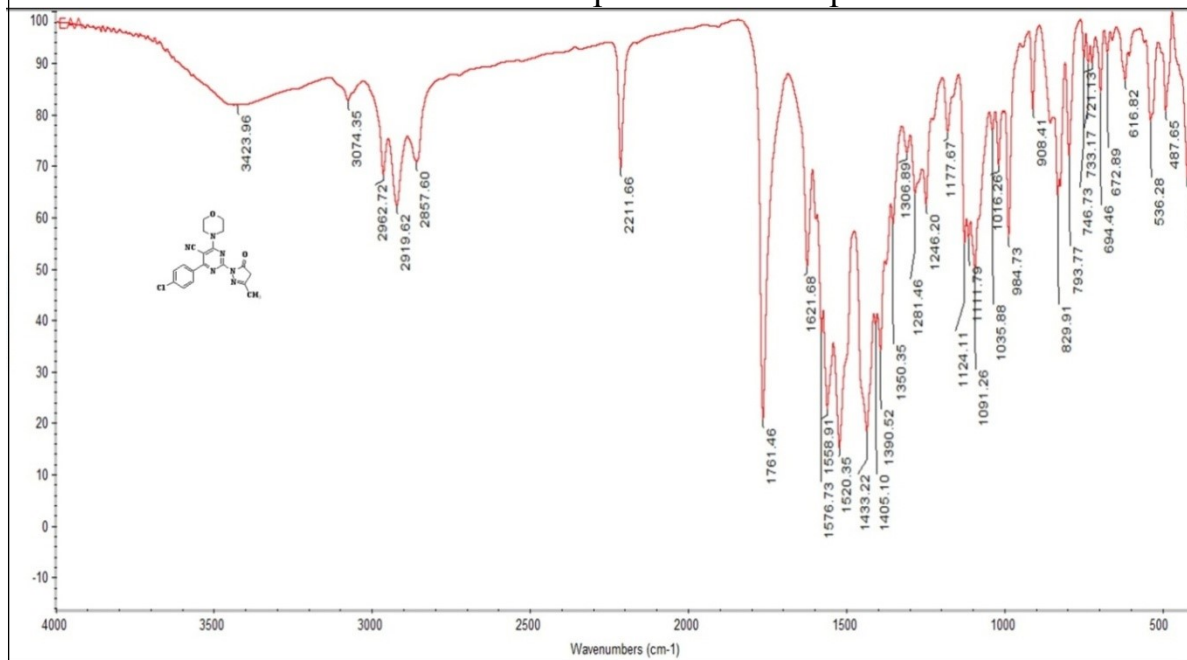

### The <sup>1</sup>H NMR spectrum of compound 7

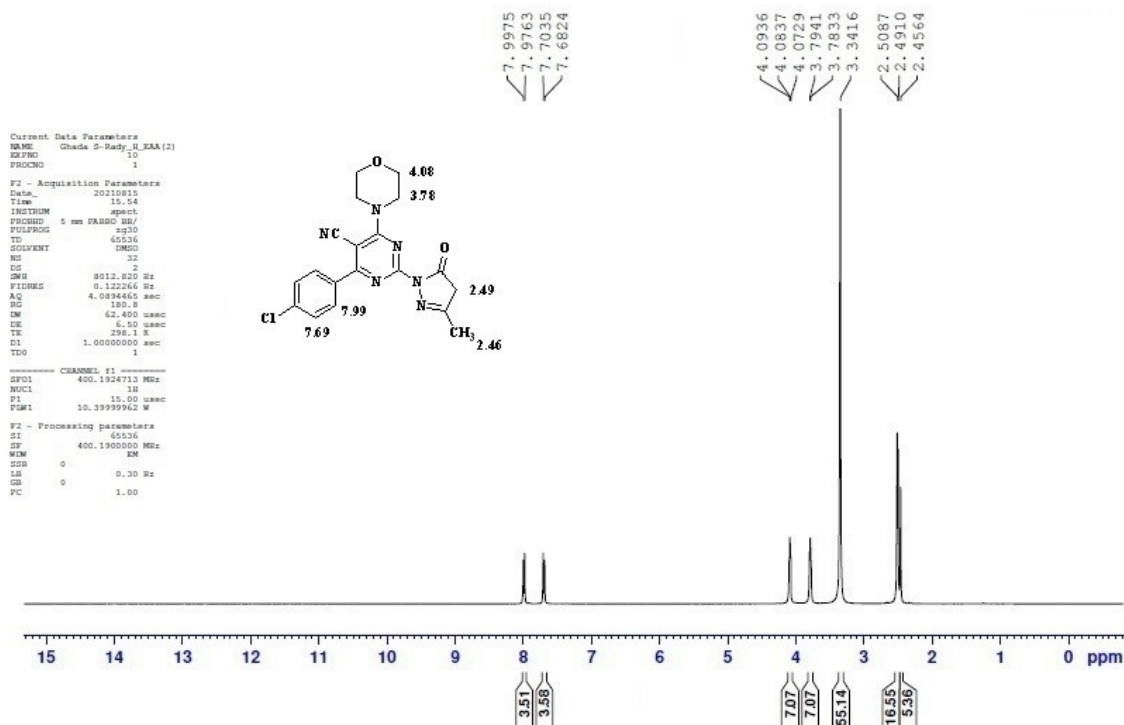

Current Data Parameters  
 NAME: Ghada 5-Rady\_R\_EAA(12)  
 EXPNO: 10  
 PROCNO: 1

F2 - Acquisition Parameters  
 Date\_: 20210815  
 Time: 15.54  
 INSTRUM: spect  
 PROBRD: 5 mm PABBO BB/  
 PULPROG: zg30  
 TD: 65536  
 SOLVENT: DMSO  
 NS: 32  
 DS: 2  
 SWH: 8012.820 Hz  
 FIDRES: 0.122266 Hz  
 AQ: 4.0894465 sec  
 RG: 180.8  
 DW: 62.400 usec  
 DE: 6.50 usec  
 TE: 298.1 K  
 D1: 1.0000000 sec  
 TDO: 1

CHANNEL f1  
 SFO1: 400.1924713 MHz  
 NUC1: 1H  
 P1: 15.00 usec  
 P1M1: 10.39999962 W

F2 - Processing parameters  
 SI: 65536  
 SF: 400.1900000 MHz  
 WMW: EM  
 SSB: 0  
 LB: 0.30 Hz  
 GB: 0  
 PC: 1.00

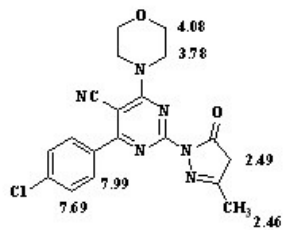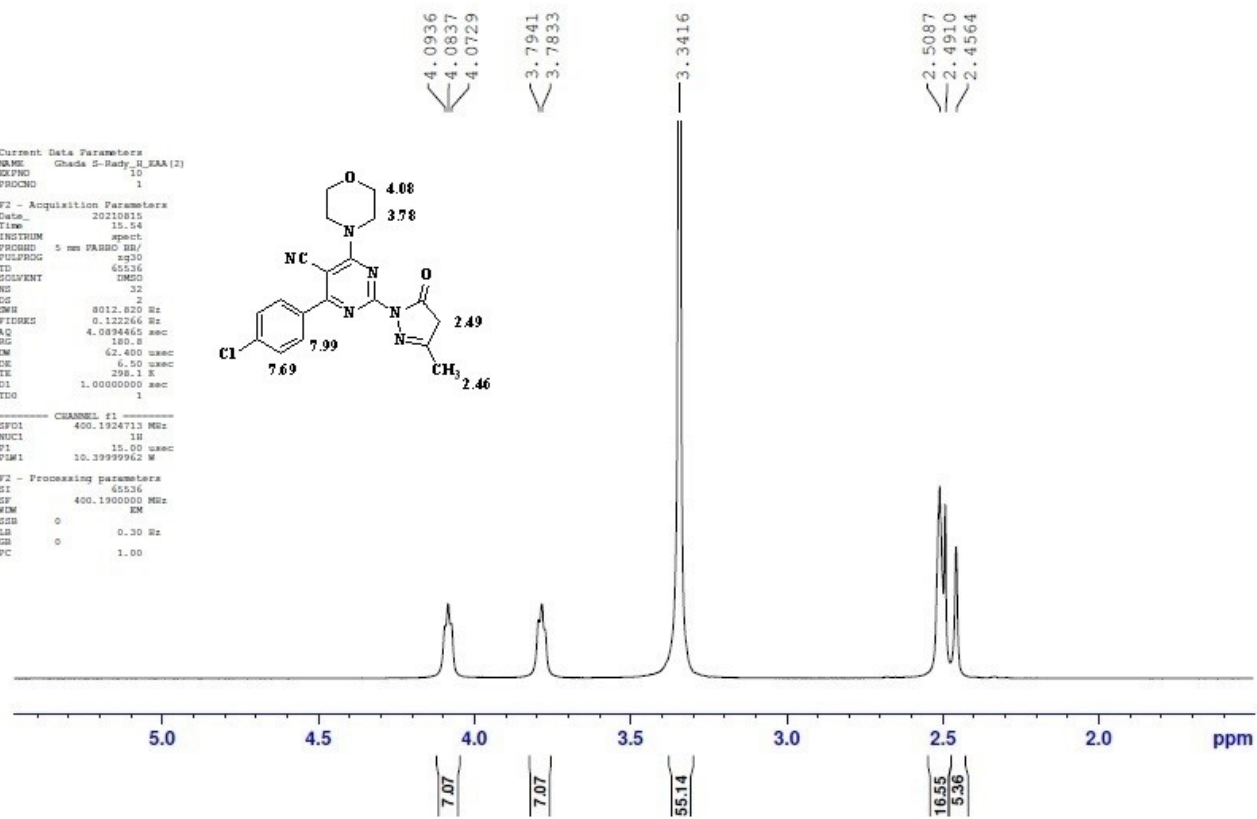

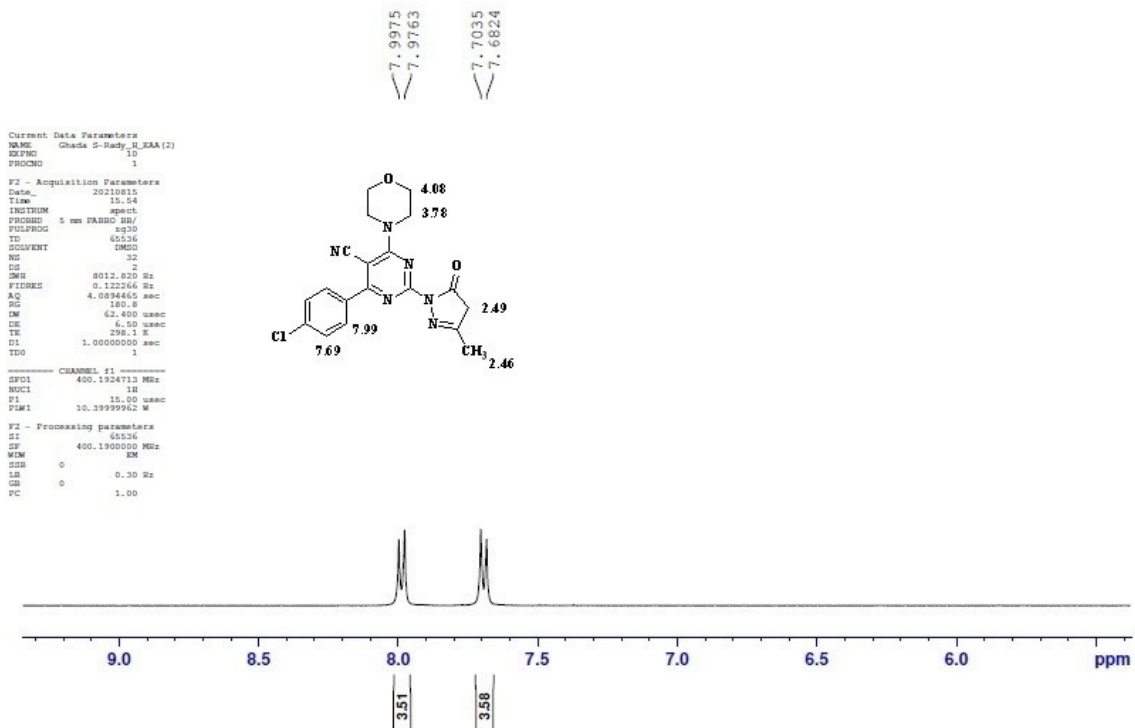

D2O

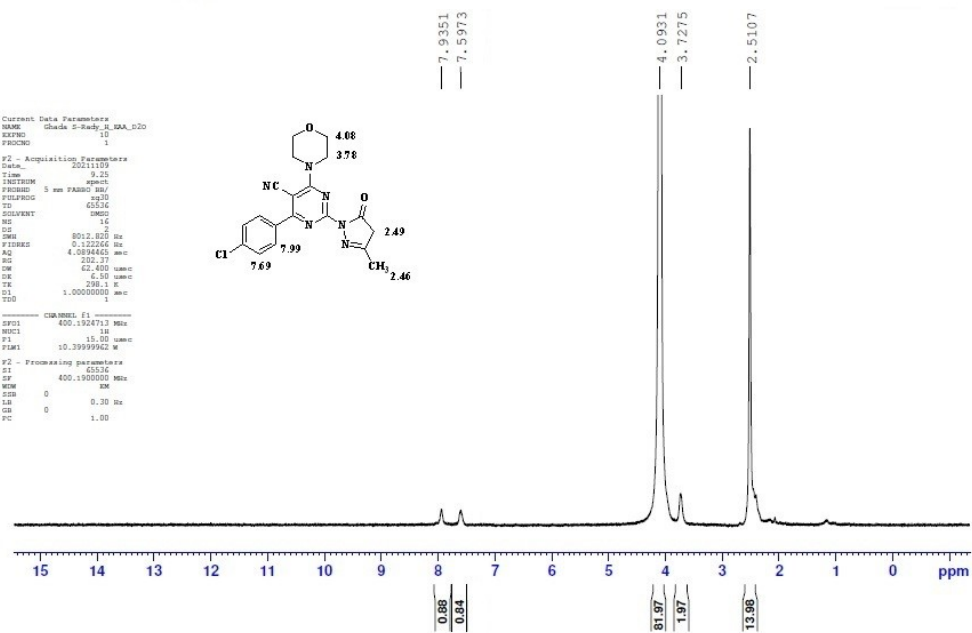



D2O

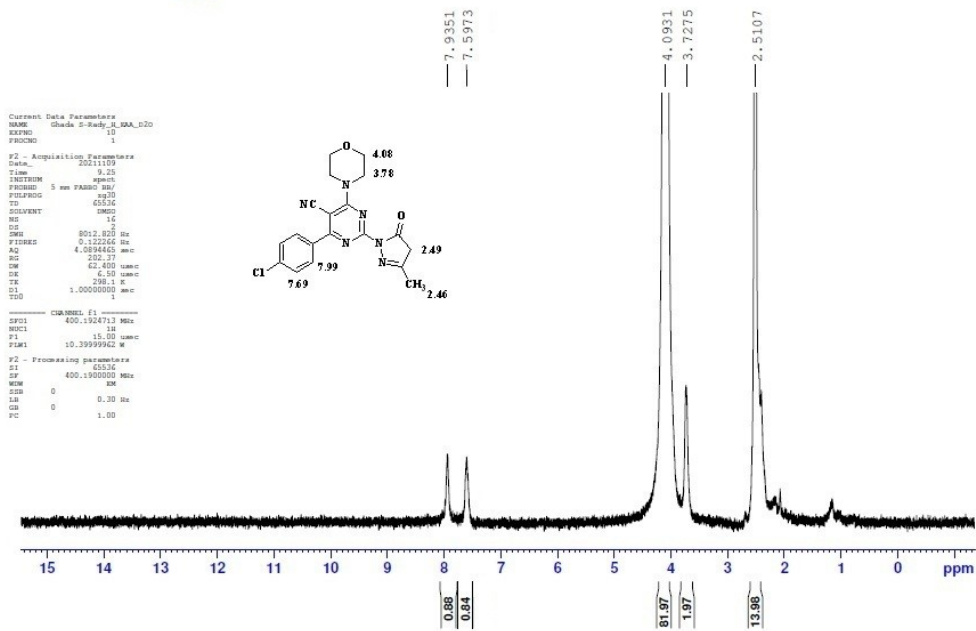

### The <sup>13</sup>C NMR spectrum of compound 7

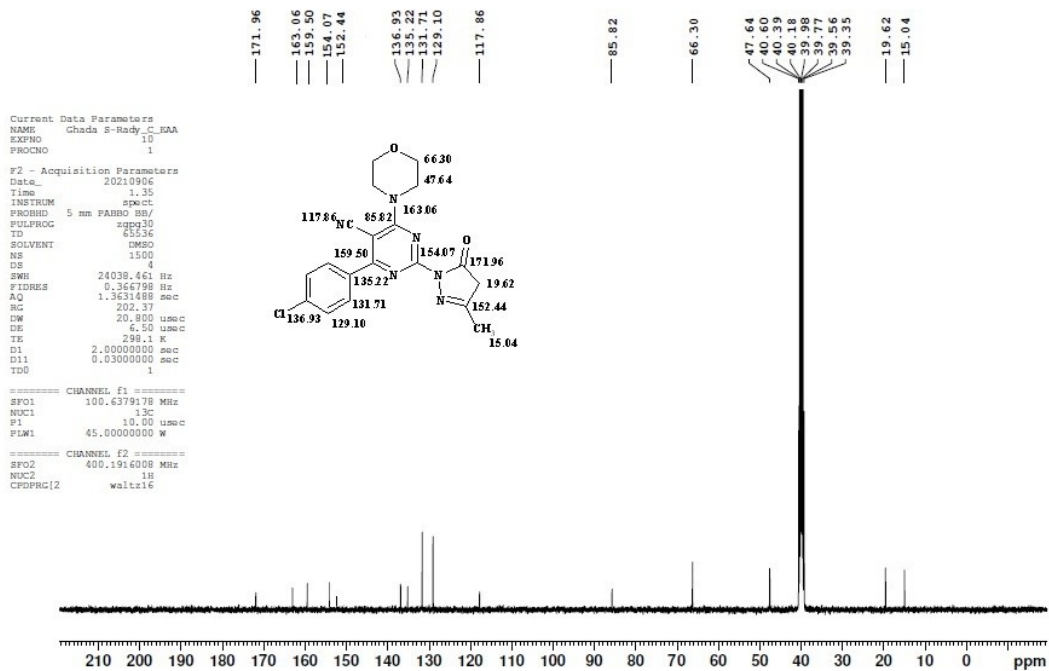

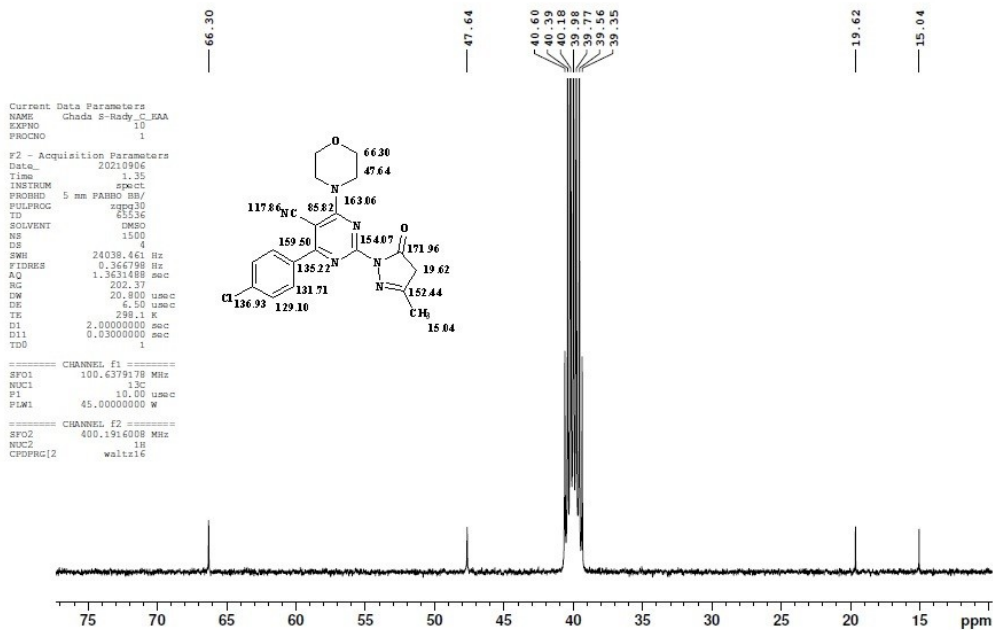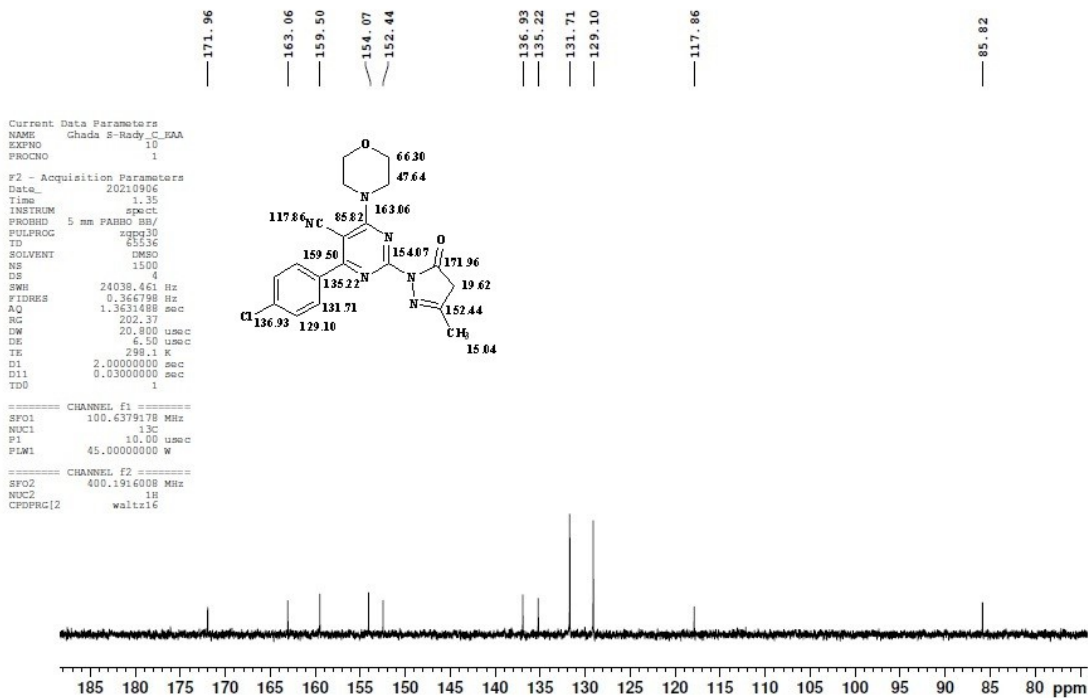

# The mass spectrum of compound 7

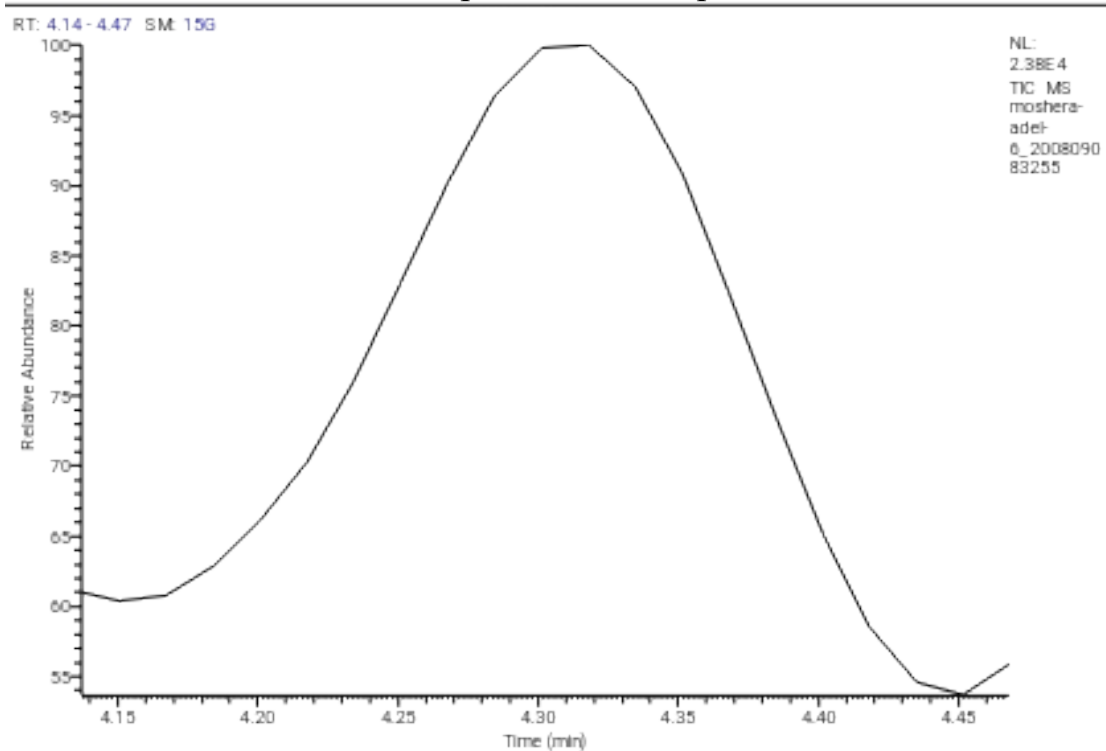

moshera-adel-6\_200809083255 #147 RT: 2.48 AV: 1 SB: 2 4.45, 4.45 NL: 4.19E2  
T: {0,0} + c EI Full ms [40.00-1000.00]

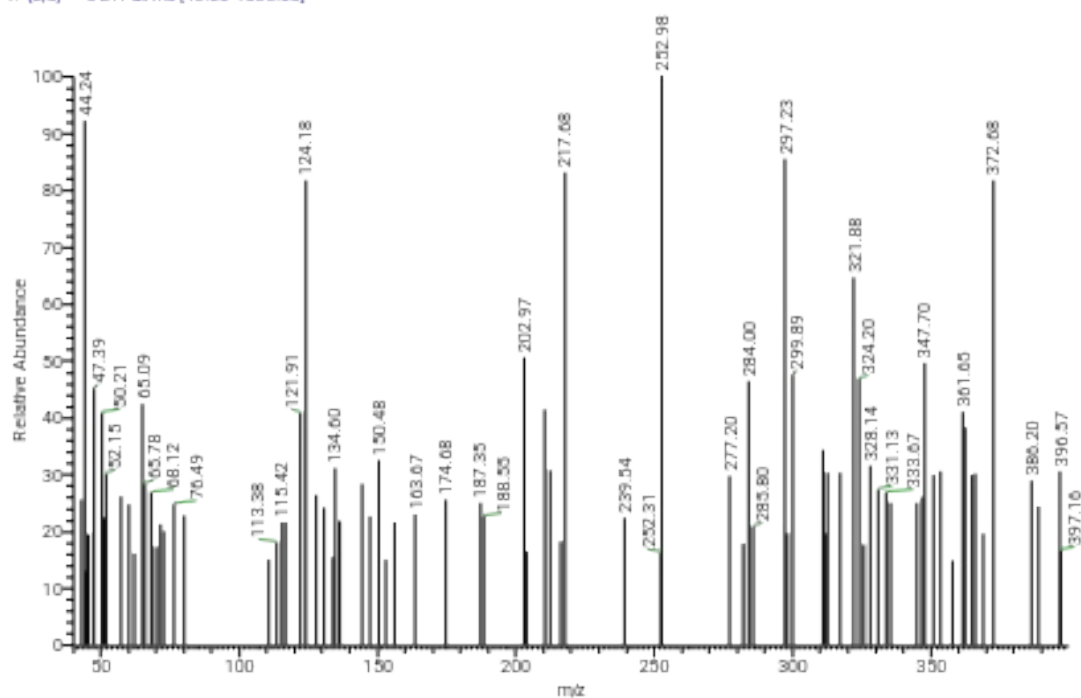

## Spectral data of compound 8

The IR spectrum of compound 8

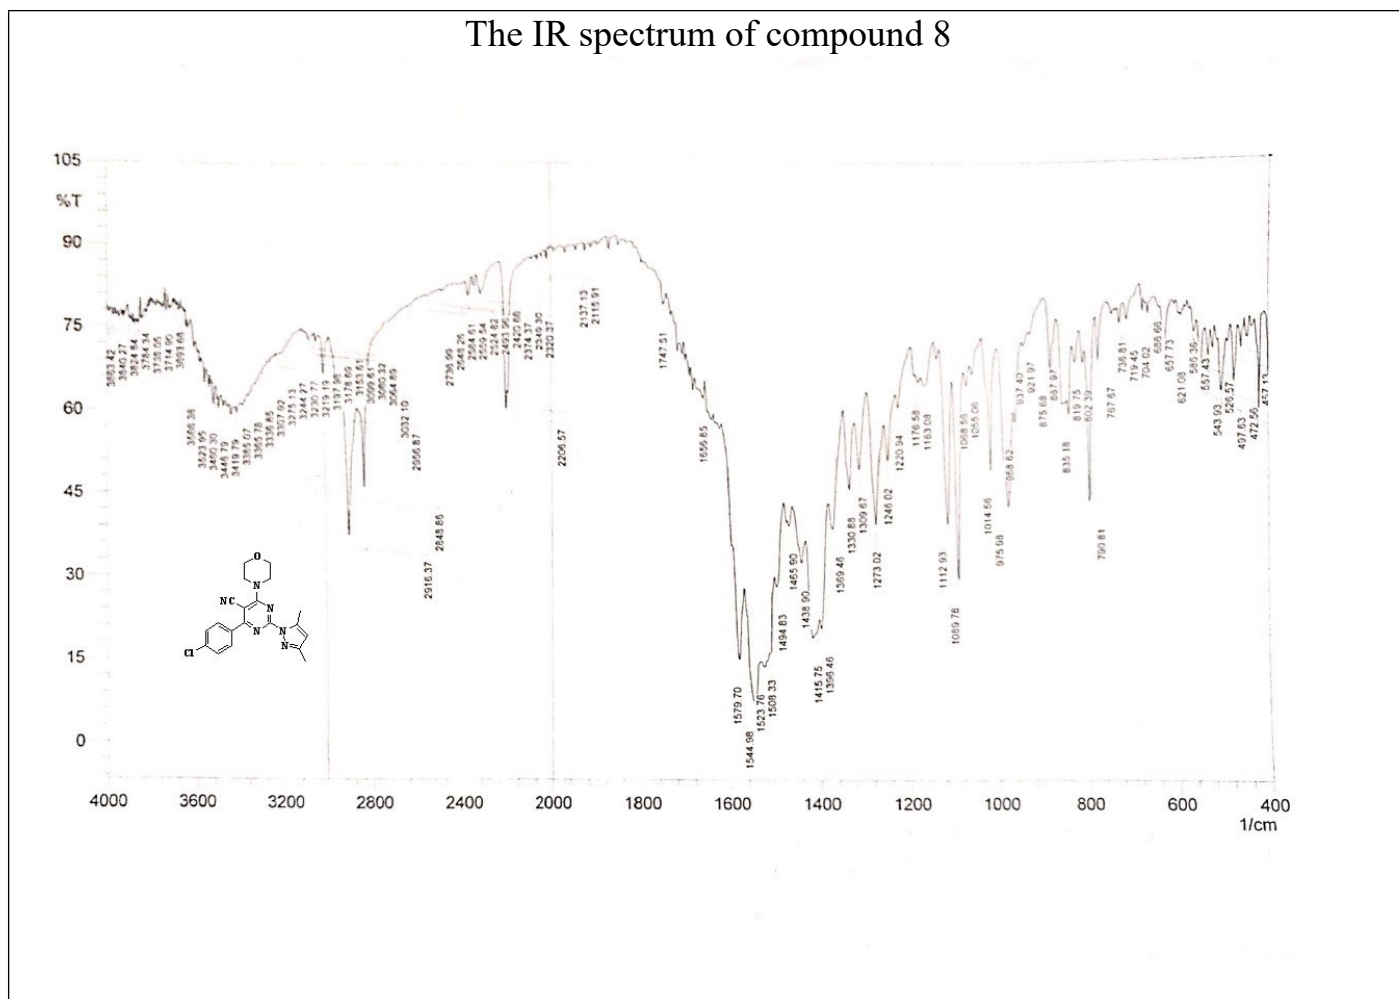

# The <sup>1</sup>H NMR spectrum of compound 8

Current Data Parameters  
 NAME Ghada S-Rady\_R\_AA  
 EXPNO 21  
 PROCNO 1

F2 - Acquisition Parameters  
 Date\_ 20201208  
 Time 17.34  
 INSTRUM spect  
 PROBRD 5 mm PABBO BB/  
 PULPROG zg30  
 TD 65536  
 SOLVENT DMSO  
 NS 32  
 DS 2  
 SWH 8012.820 Hz  
 FIDRES 0.122266 Hz  
 AQ 4.0894465 sec  
 RG 146.06  
 DM 62.400 usec  
 DE 4.50 usec  
 TE 298.0 K  
 D1 1.0000000 sec  
 TDO 1

----- CHANNEL f1 -----  
 SFO1 400.1924713 MHz  
 NUC1 1H  
 P1 15.00 usec  
 PLW1 10.39999962 W

F2 - Processing parameters  
 SI 65536  
 SF 400.1900000 MHz  
 WDW EM  
 SSB 0  
 LB 0.30 Hz  
 GB 0  
 PC 1.00

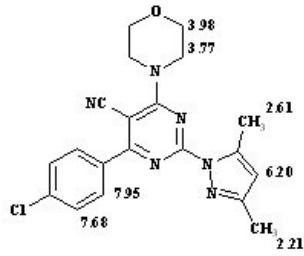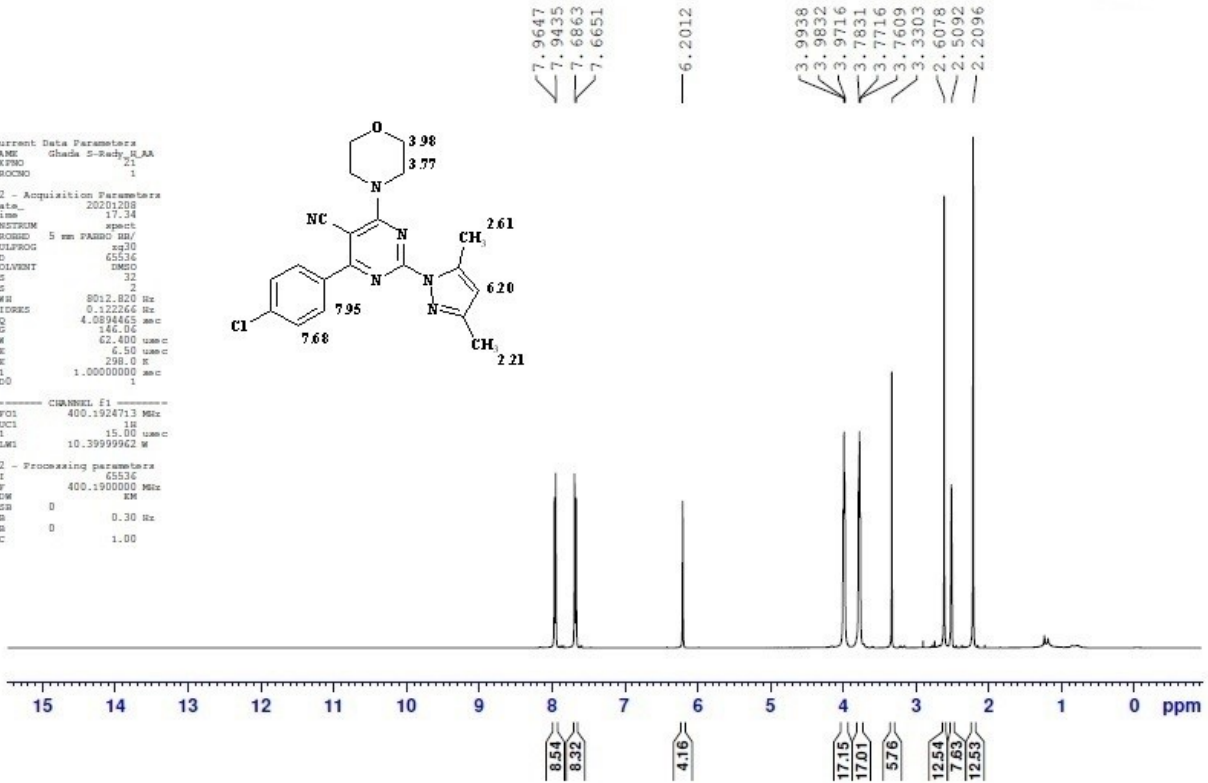

Current Data Parameters  
 NAME Ghada S-Rady\_R\_AA  
 EXPNO 21  
 PROCNO 1

F2 - Acquisition Parameters  
 Date\_ 20201208  
 Time 17.34  
 INSTRUM spect  
 PROBRD 5 mm PABBO BB/  
 PULPROG zg30  
 TD 65536  
 SOLVENT DMSO  
 NS 32  
 DS 2  
 SWH 8012.820 Hz  
 FIDRES 0.122266 Hz  
 AQ 4.0894465 sec  
 RG 146.06  
 DM 62.400 usec  
 DE 4.50 usec  
 TE 298.0 K  
 D1 1.0000000 sec  
 TDO 1

----- CHANNEL f1 -----  
 SFO1 400.1924713 MHz  
 NUC1 1H  
 P1 15.00 usec  
 PLW1 10.39999962 W

F2 - Processing parameters  
 SI 65536  
 SF 400.1900000 MHz  
 WDW EM  
 SSB 0  
 LB 0.30 Hz  
 GB 0  
 PC 1.00

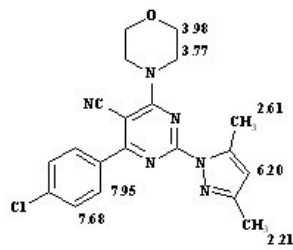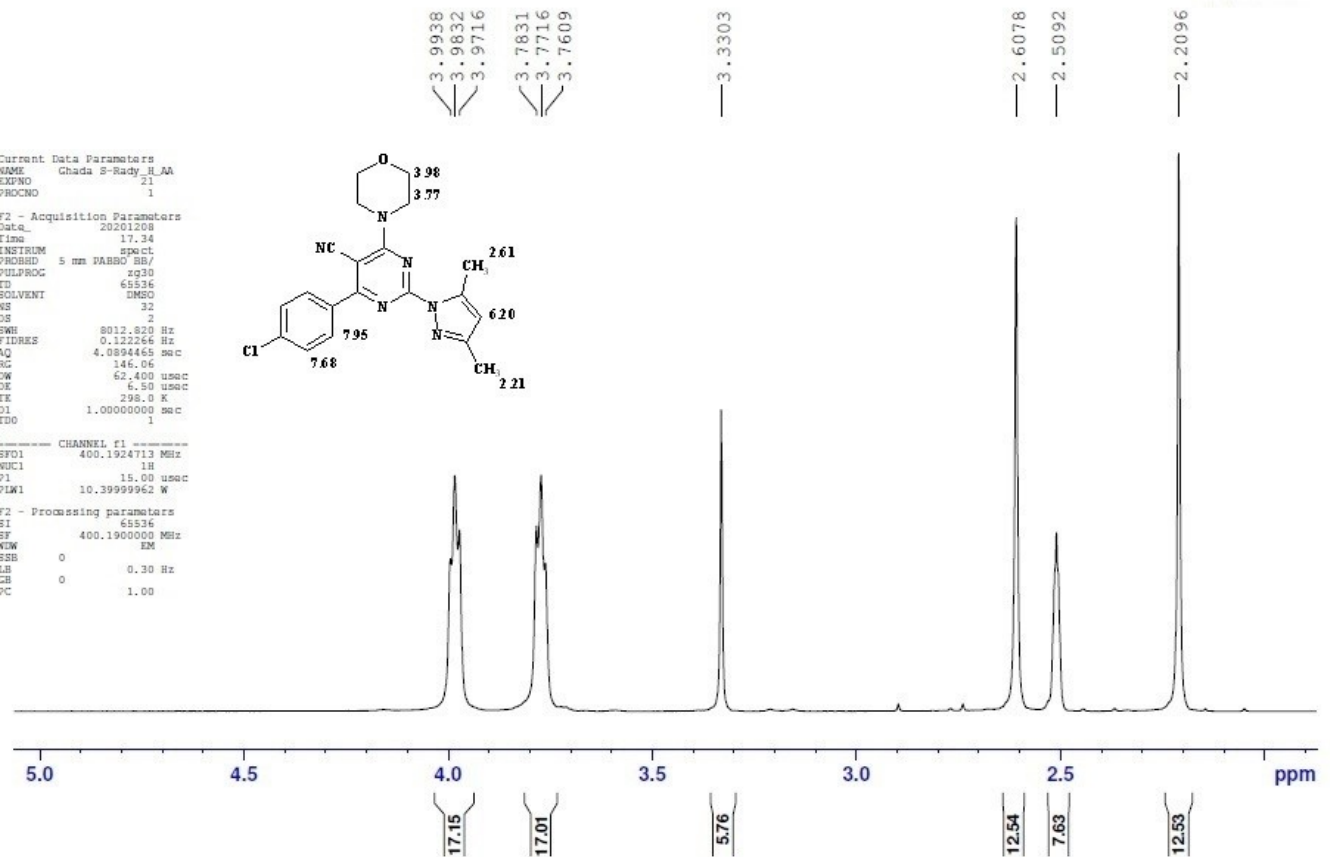

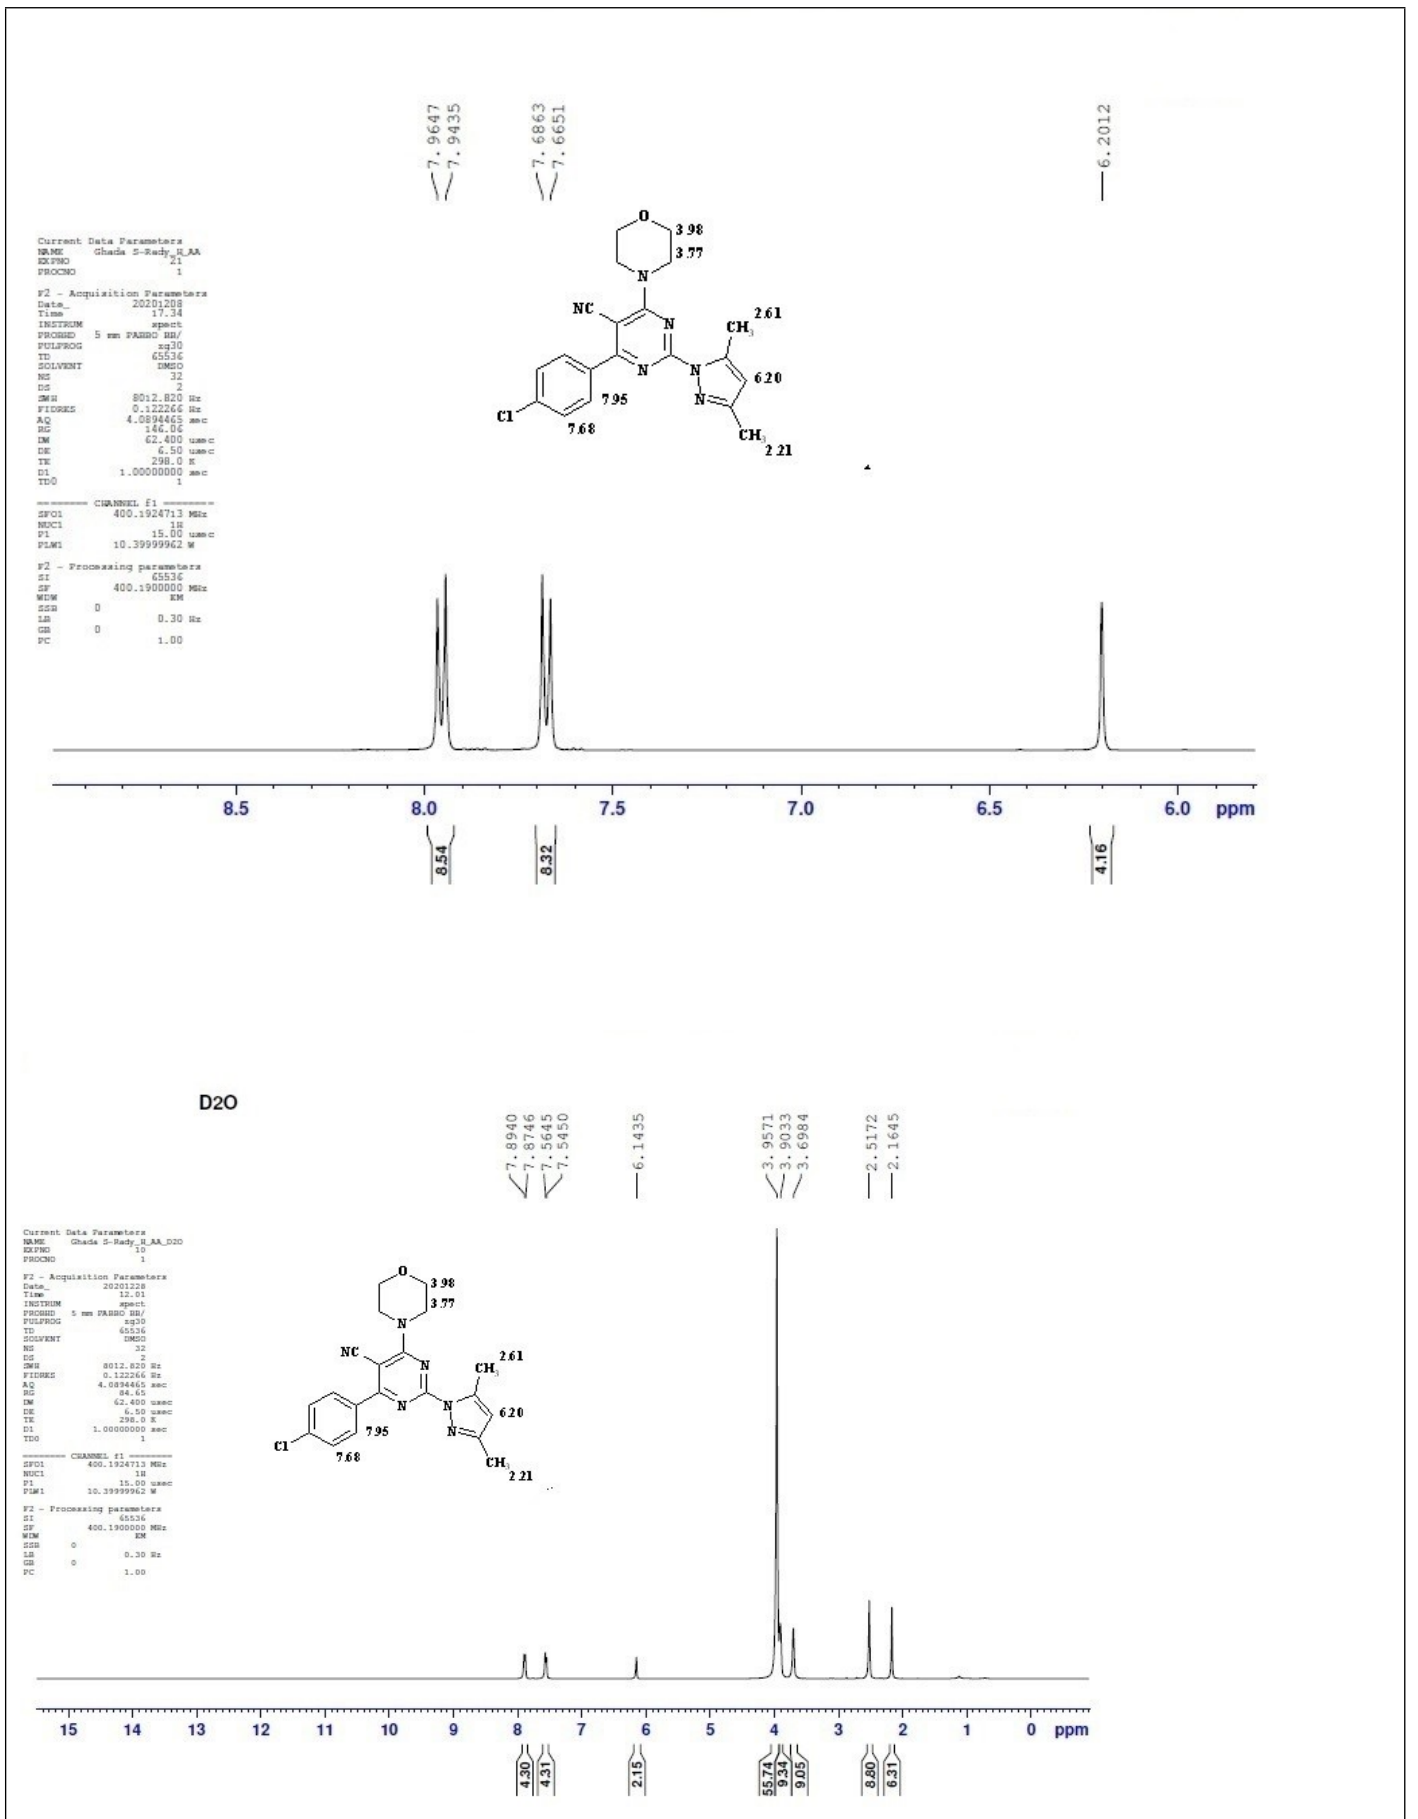

# D<sub>2</sub>O spectrum of compound 8

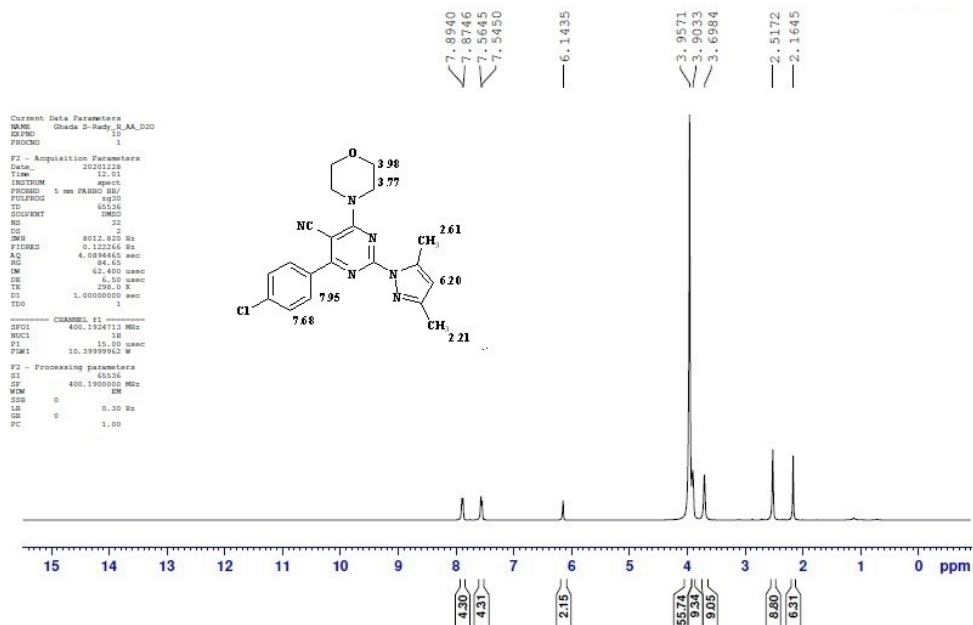

## D2O

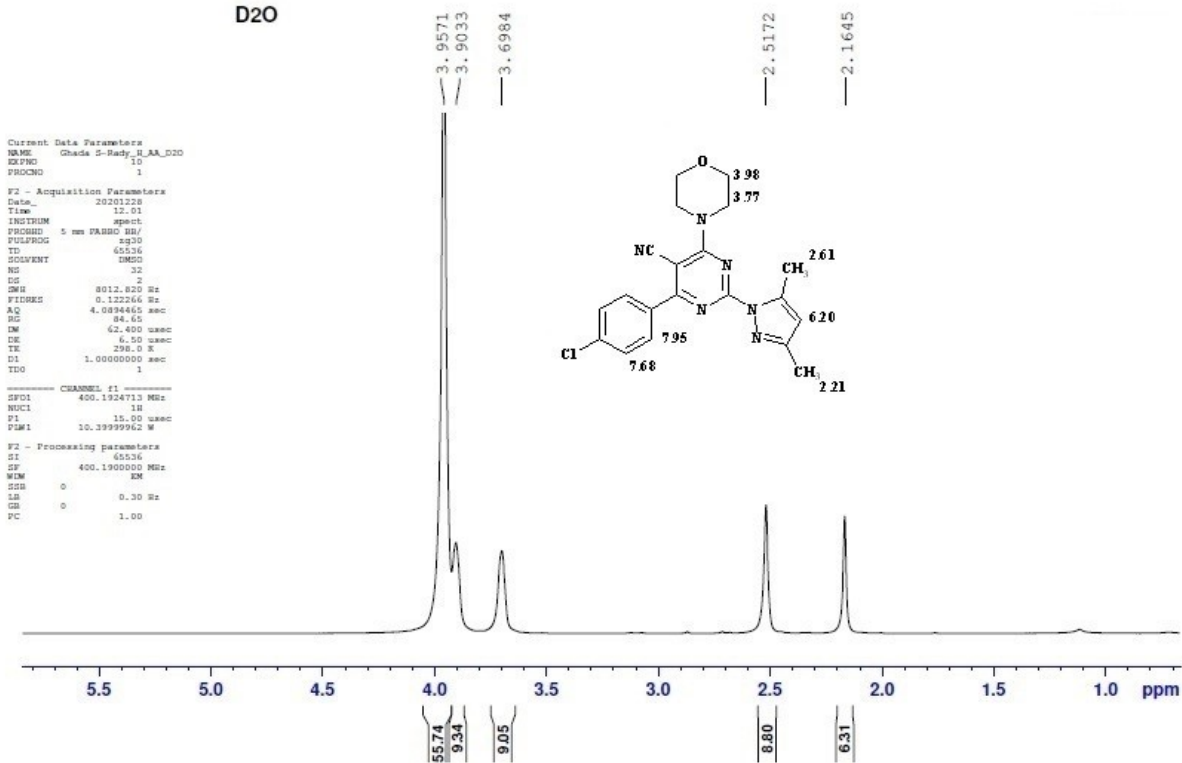

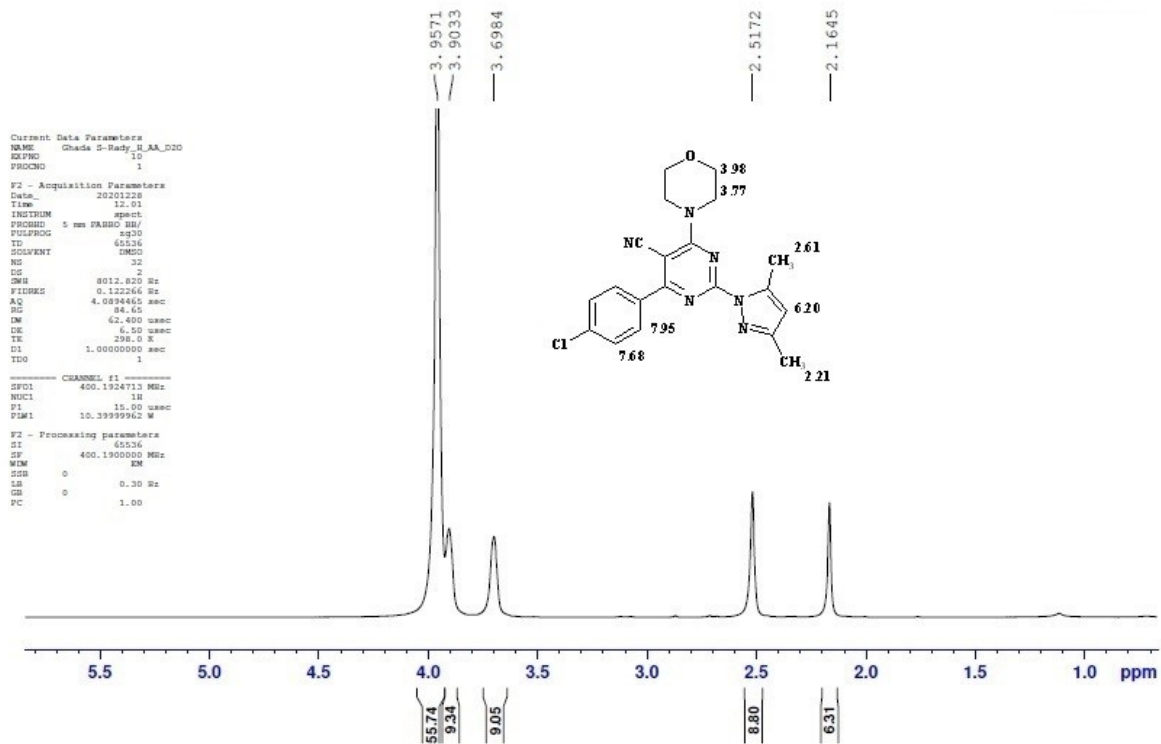

D2O

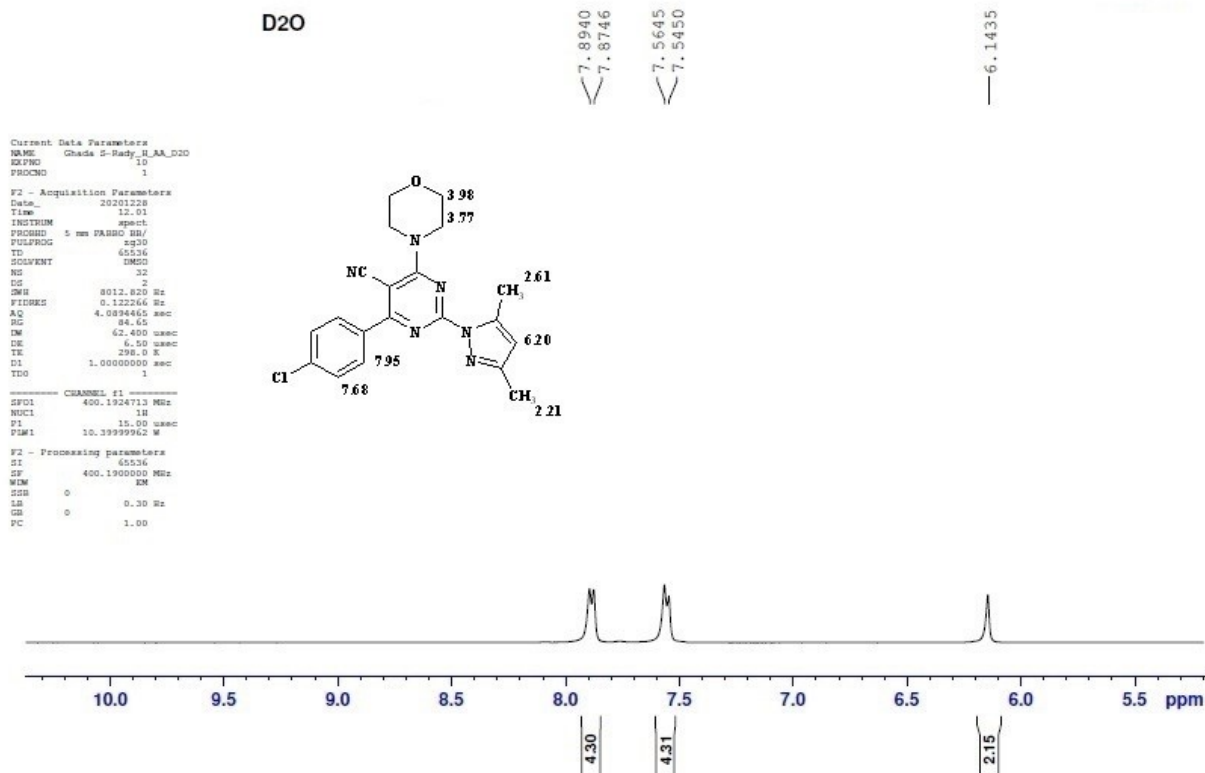



# The <sup>13</sup>C NMR spectrum of compound 8

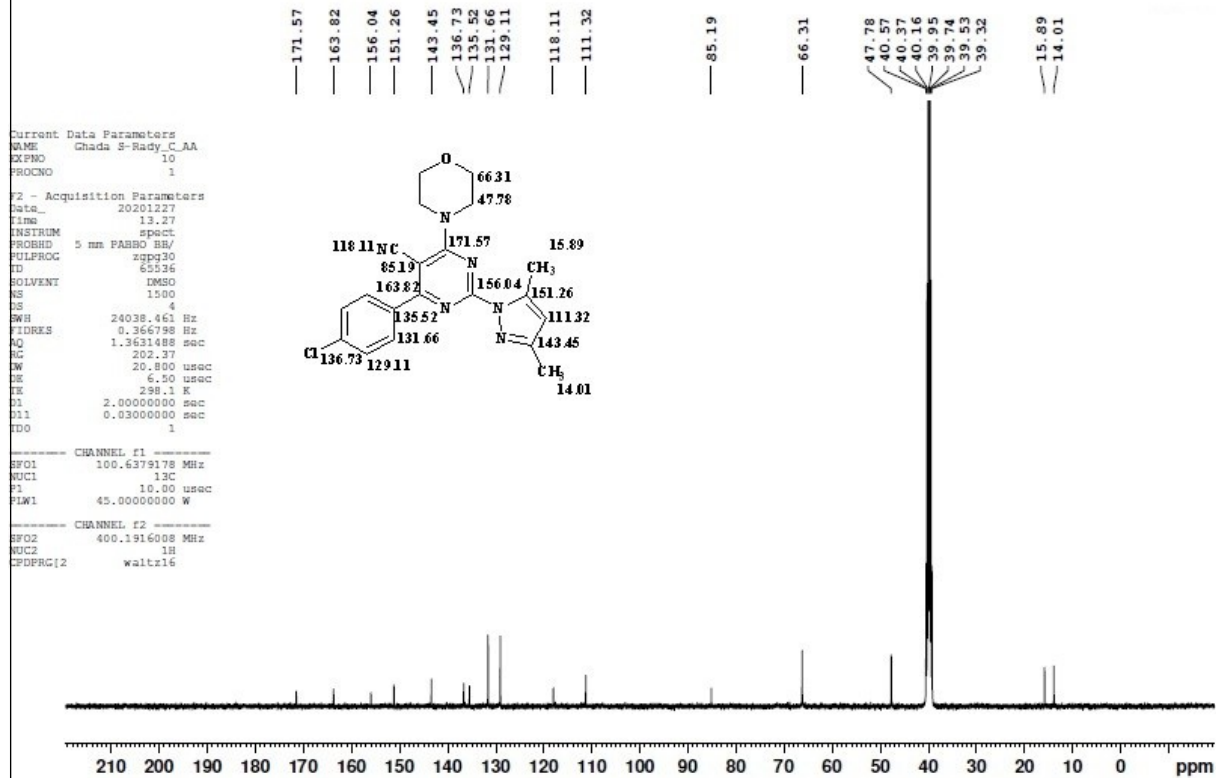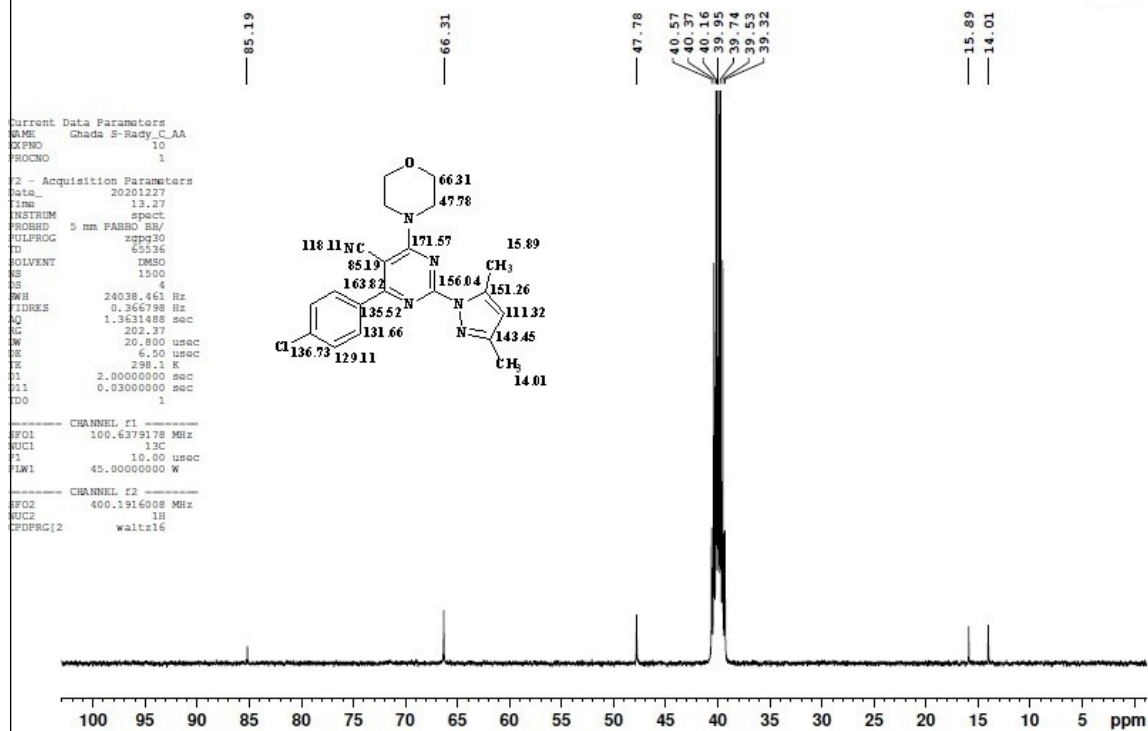

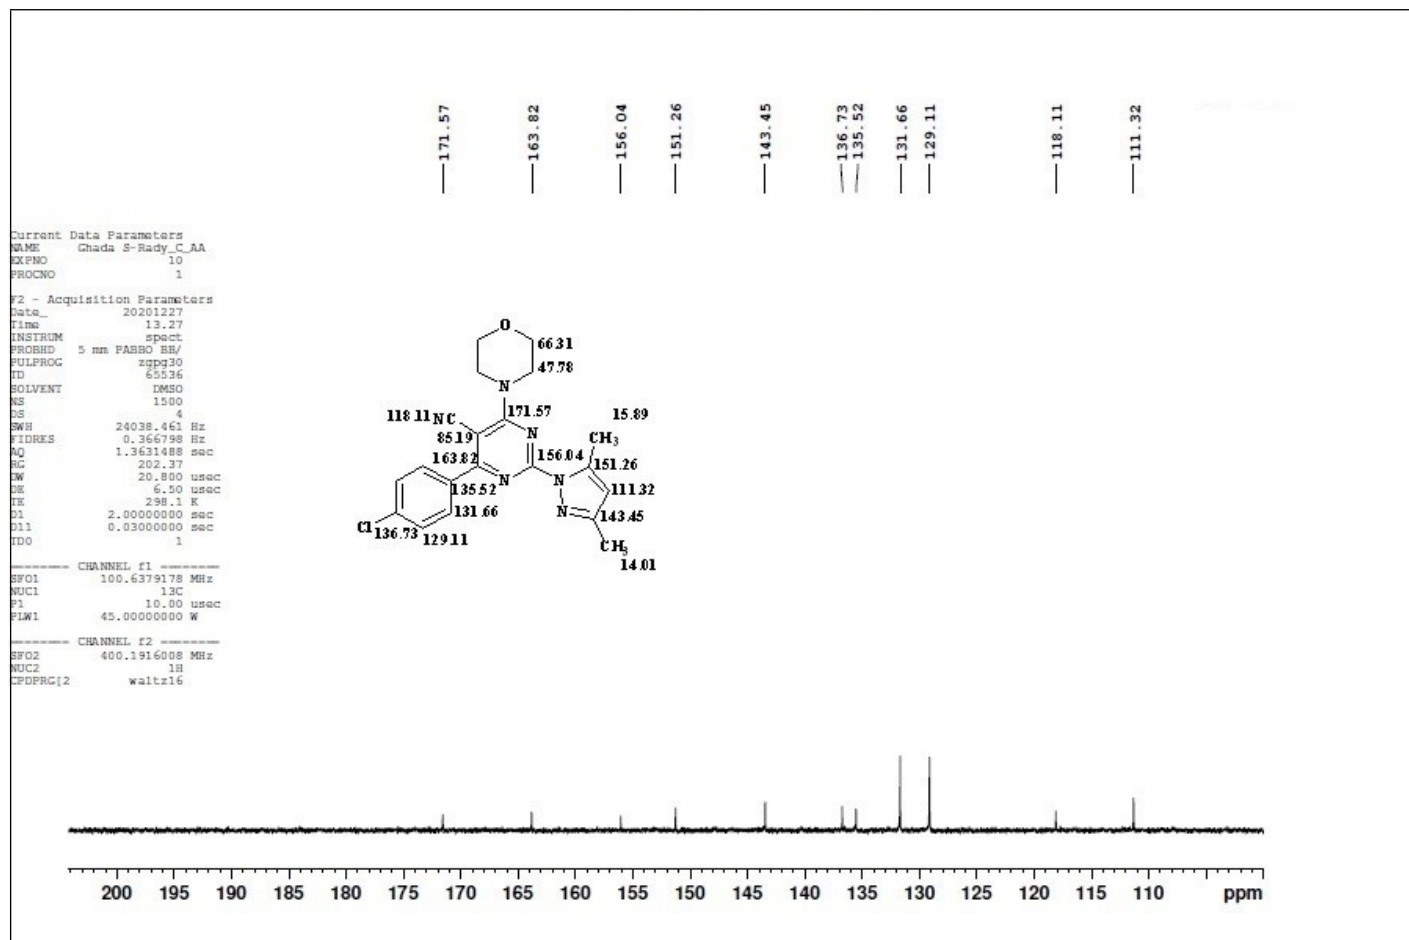

# The mass spectrum of compound 8

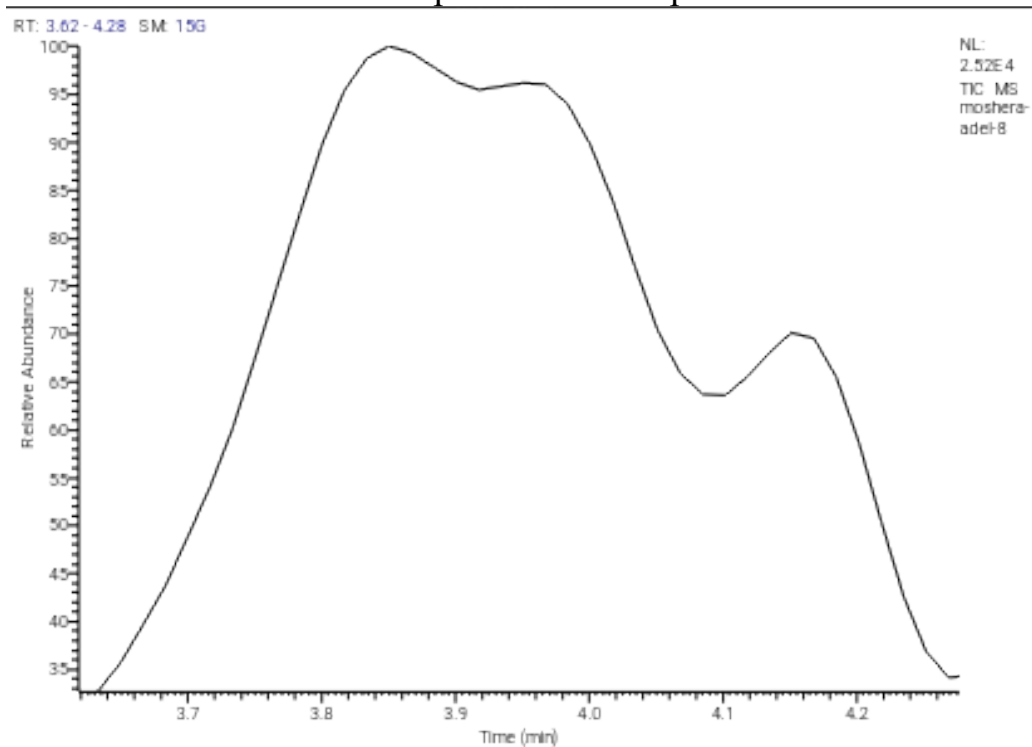

moshera-adei-8 #244 RT: 4.10 AV: 1 SB: 2 4.37, 4.37 NL: 3.18E 2  
T: {0,0} +cEI Full ms [40.00-1000.00]

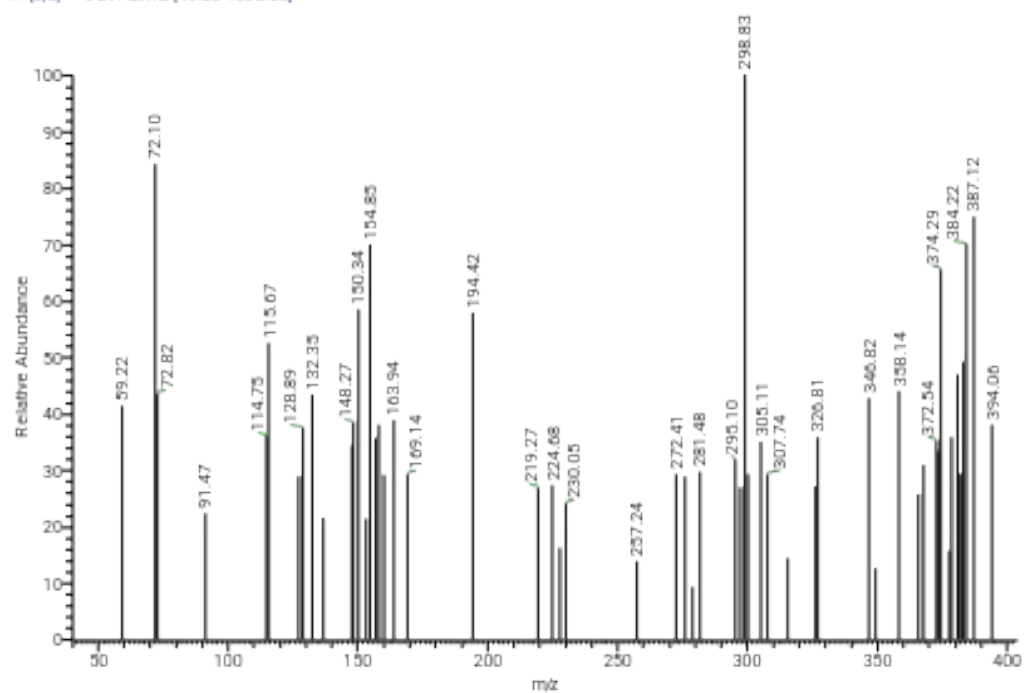

## Spectral data of compound 9

The IR spectrum of compound 9

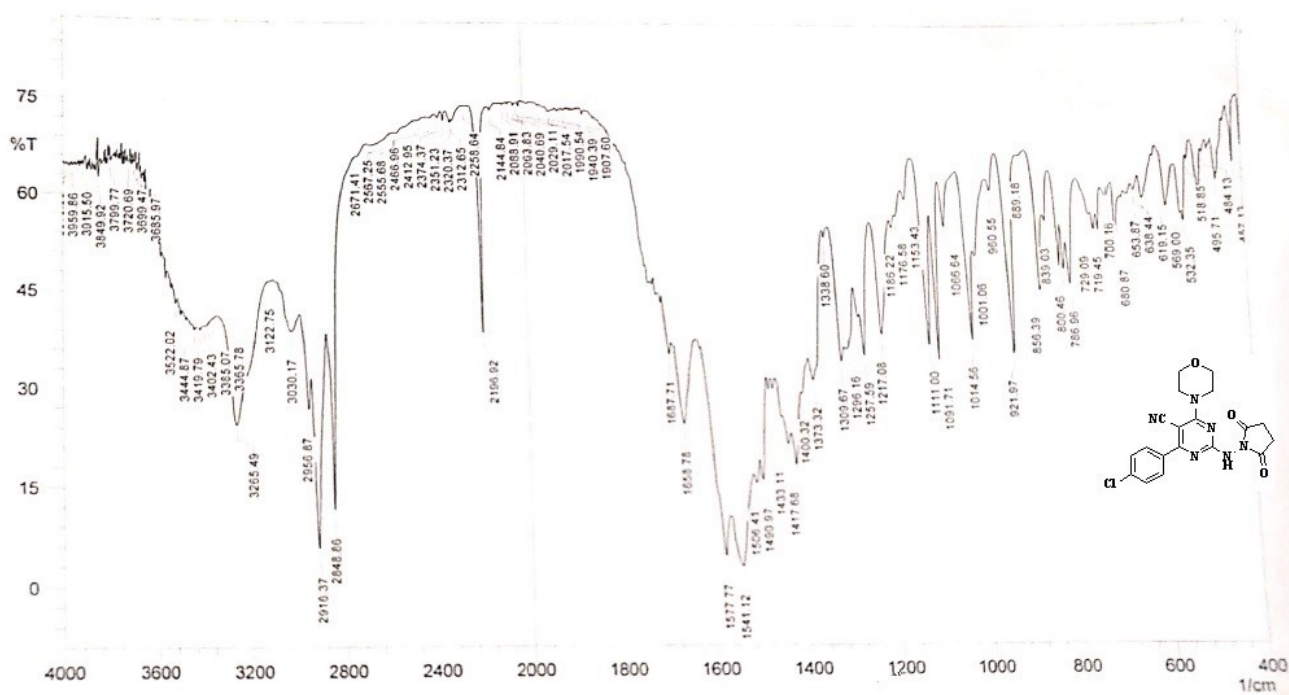

# The <sup>1</sup>H NMR spectrum of compound 9

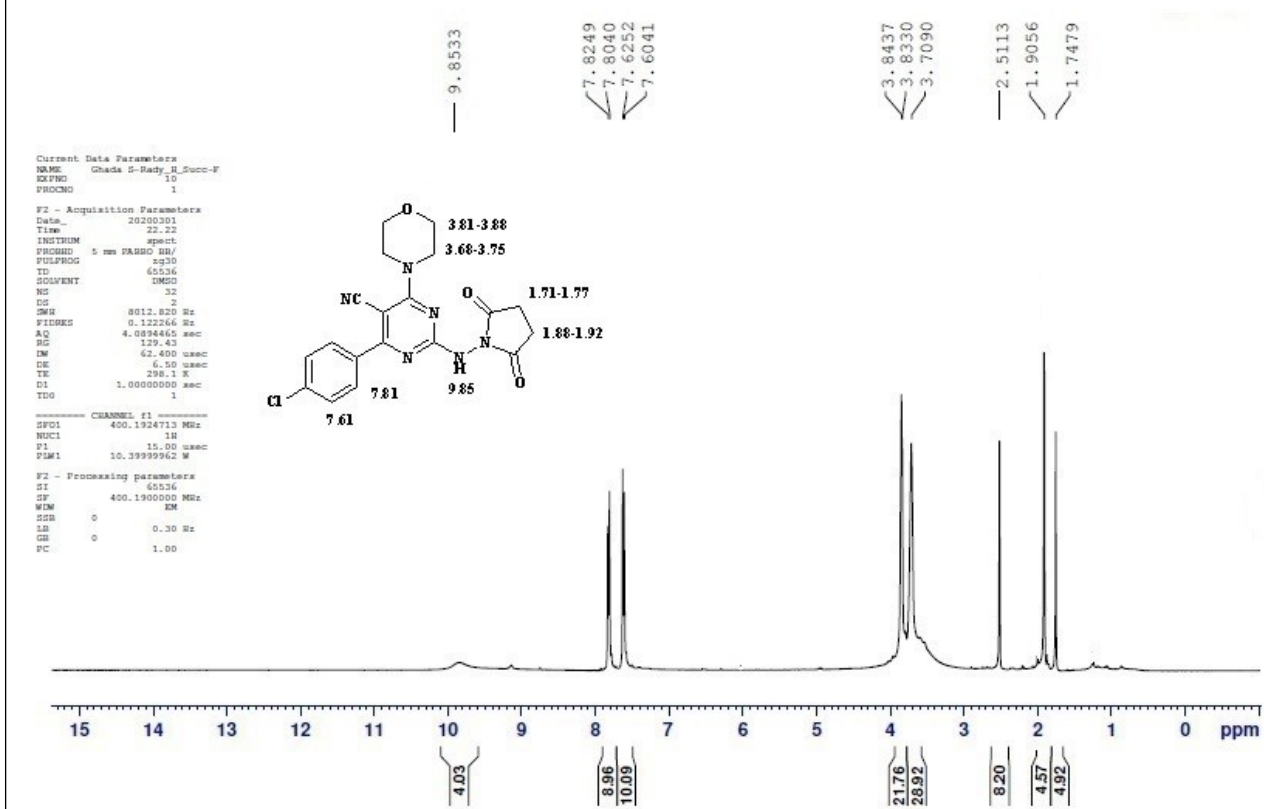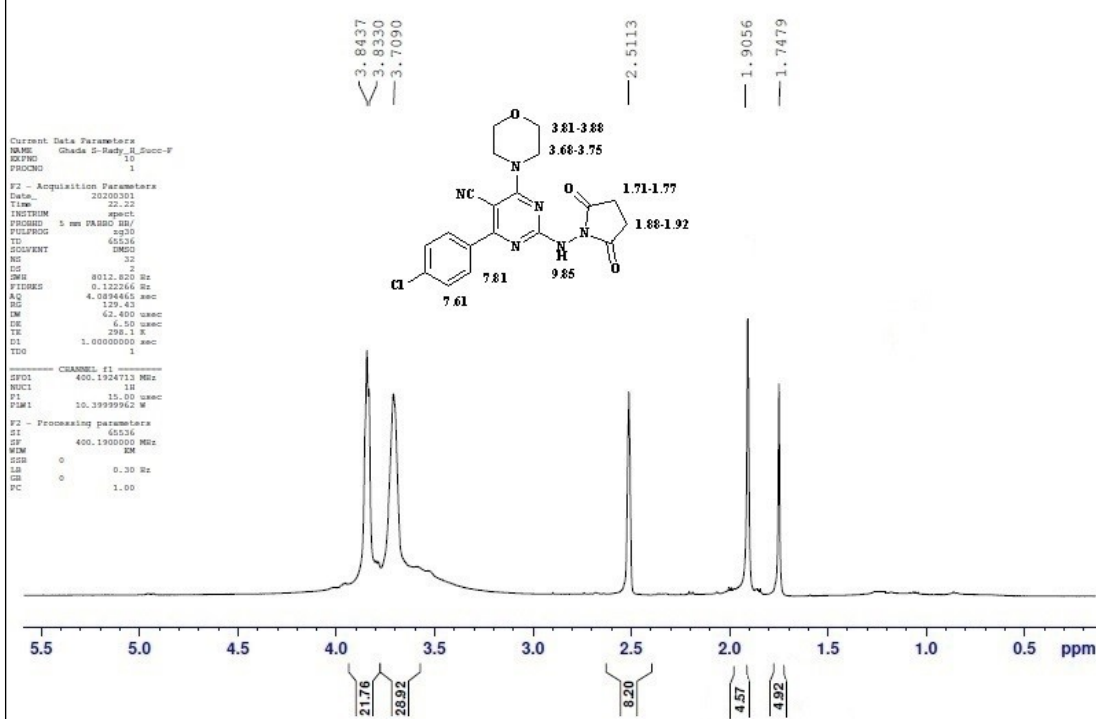

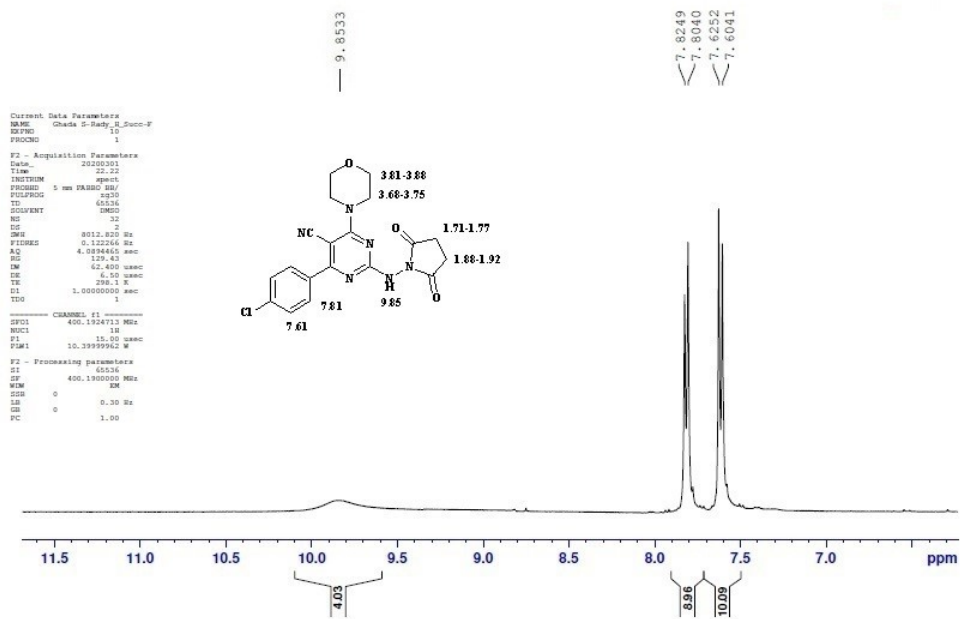

D2O

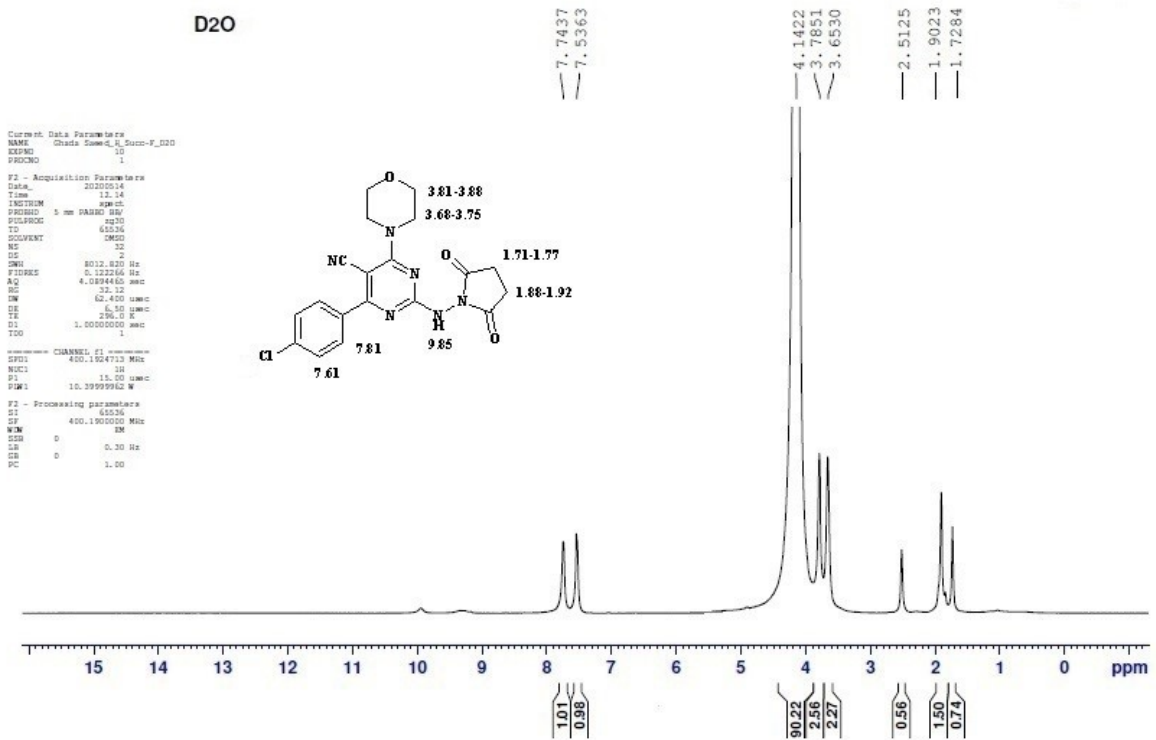

# The <sup>13</sup>C NMR spectrum of compound 9

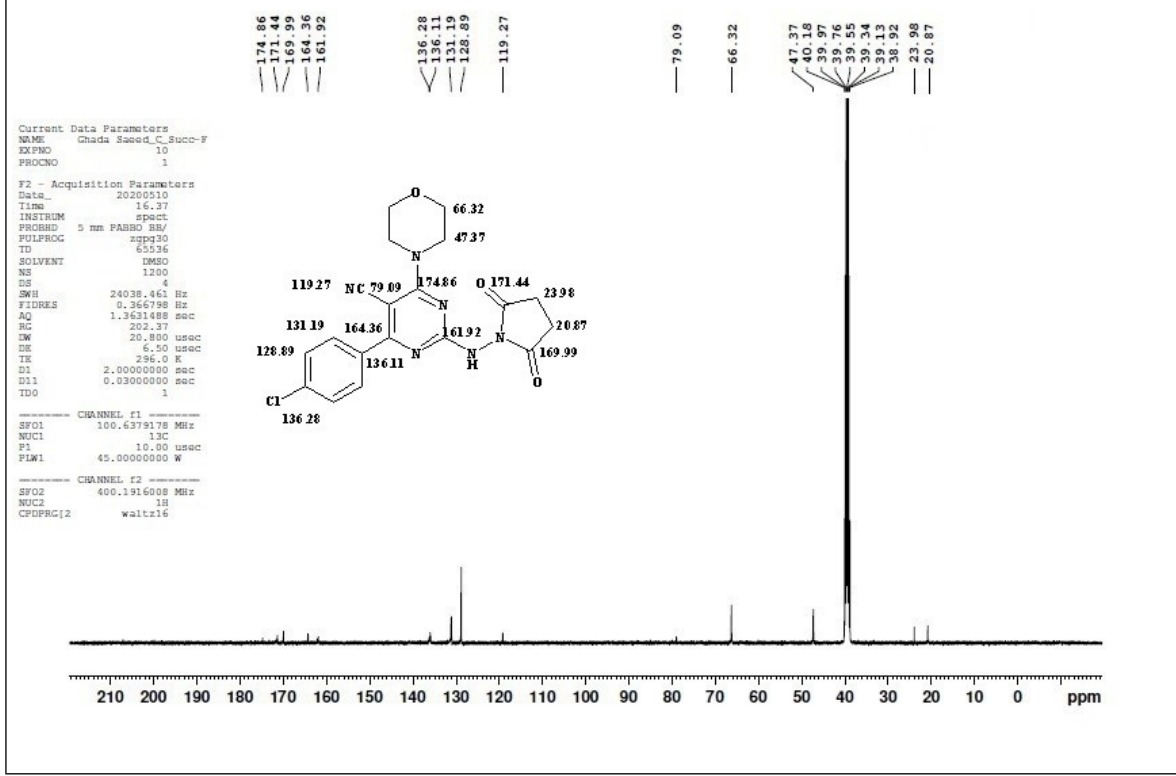

# The mass spectrum of compound 9

RT: 3.70 - 4.29 SM: 156

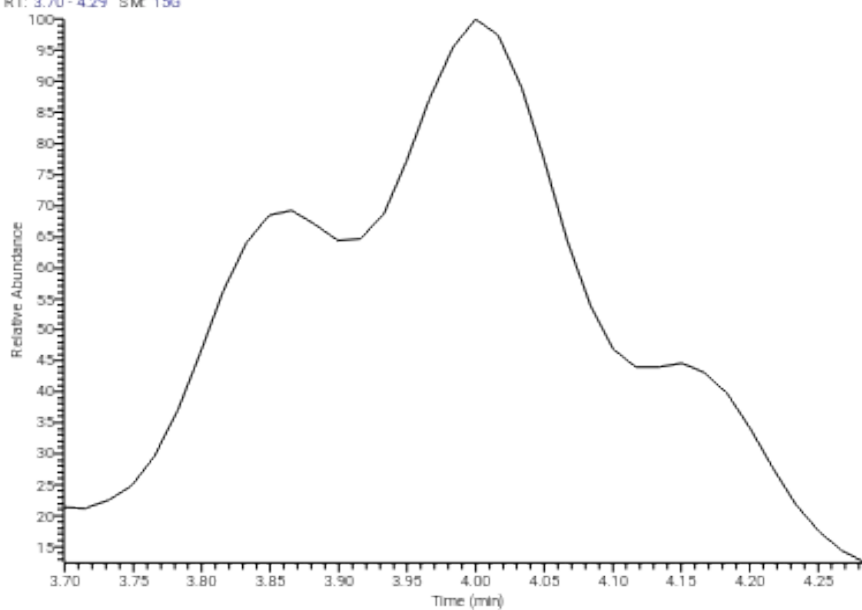

NL:  
1.79E4  
TIC MS  
moshera-  
adel-11\_2

moshera-adel-11\_2 #237 RT: 3.98 AV: 1 SB: 2 4.45, 4.45 NL: 4.79E2  
T: {0,0} + cEI Full ms [40.00-1000.00]

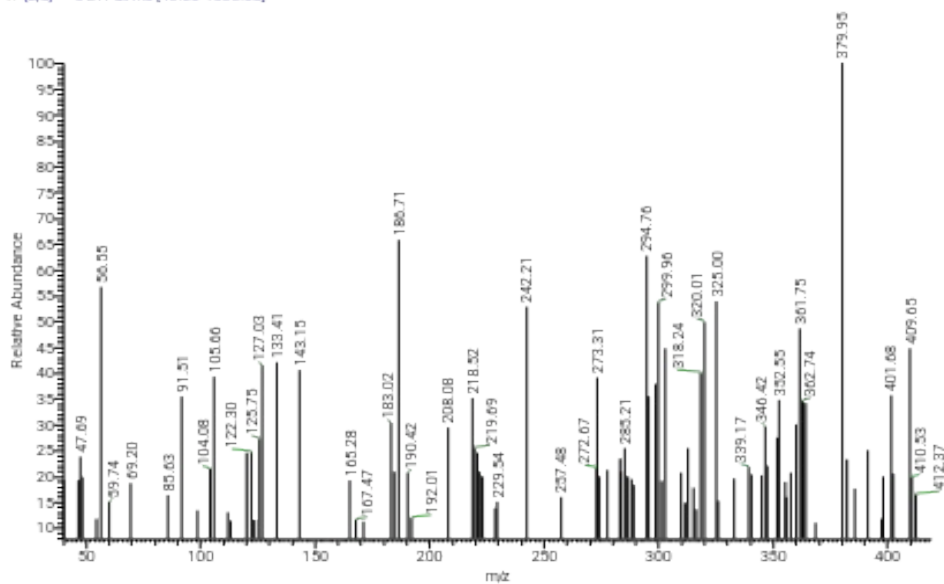



## Spectral data of compound 10

The IR spectrum of compound 10

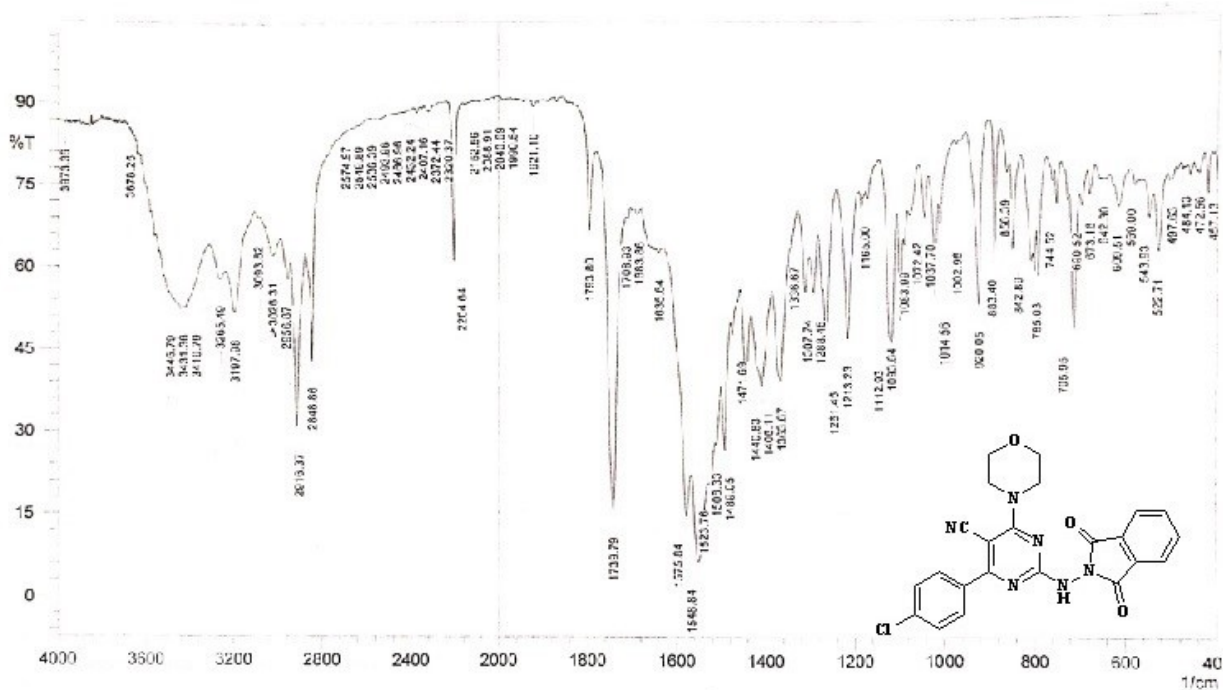

# The <sup>1</sup>H NMR spectrum of compound 10

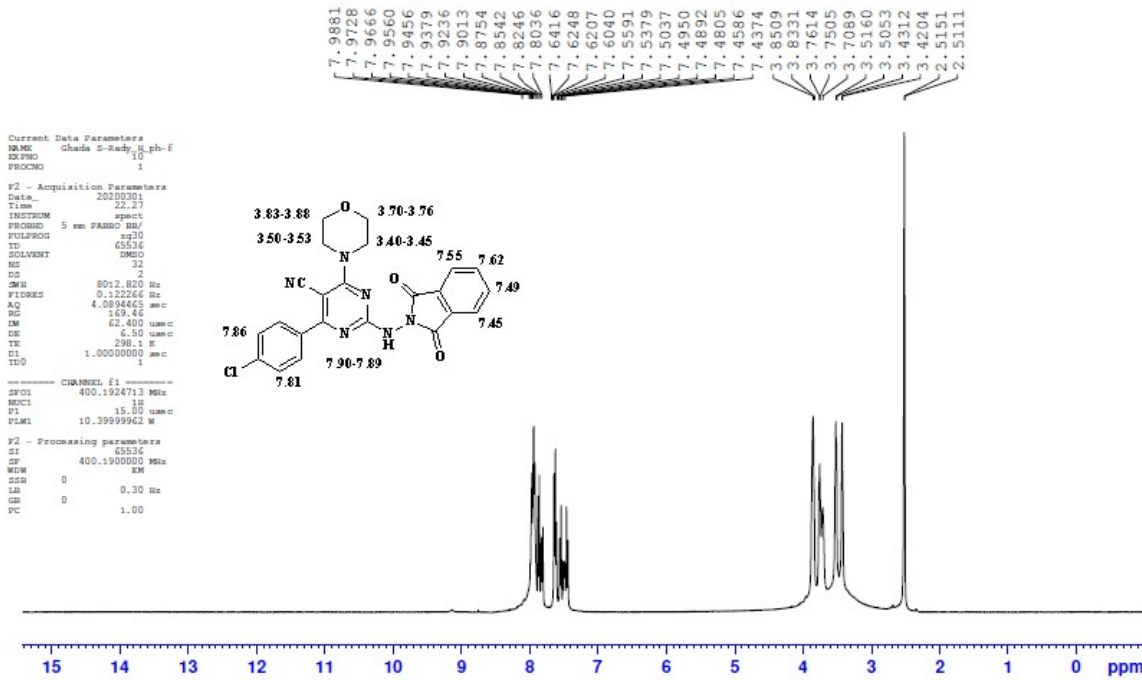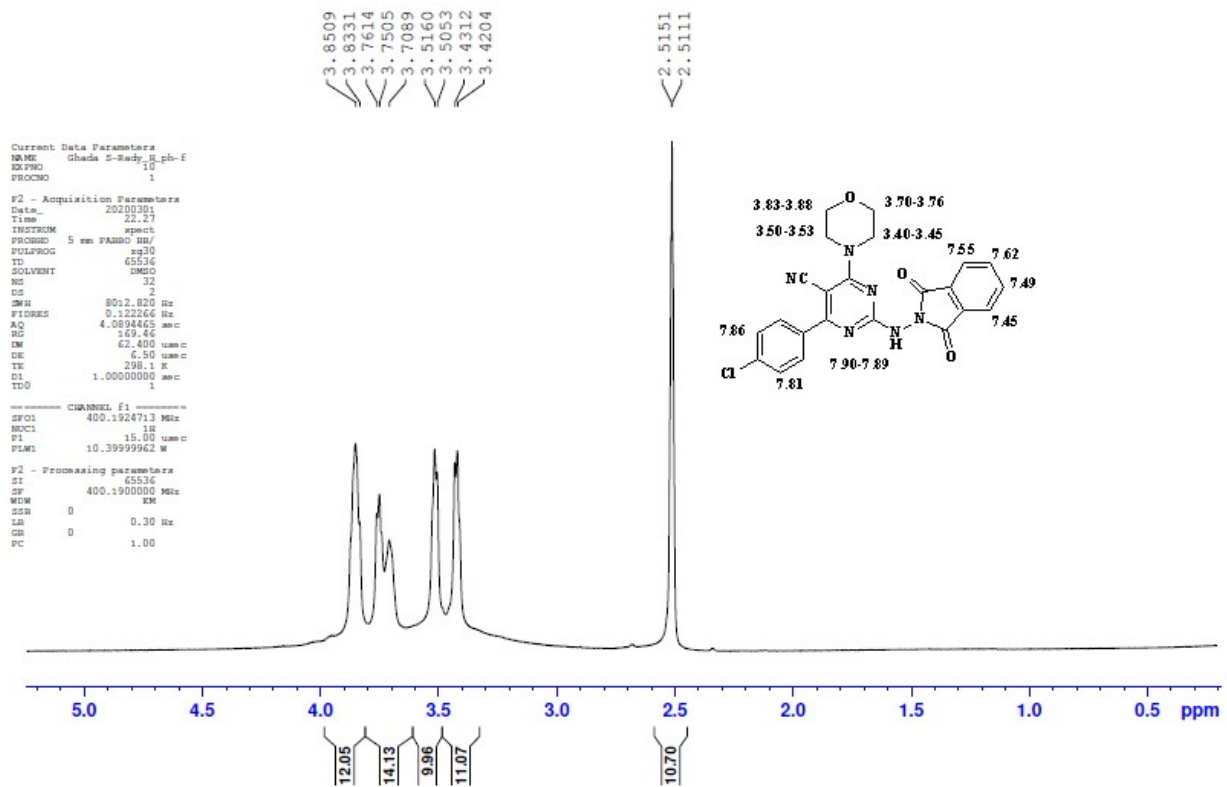

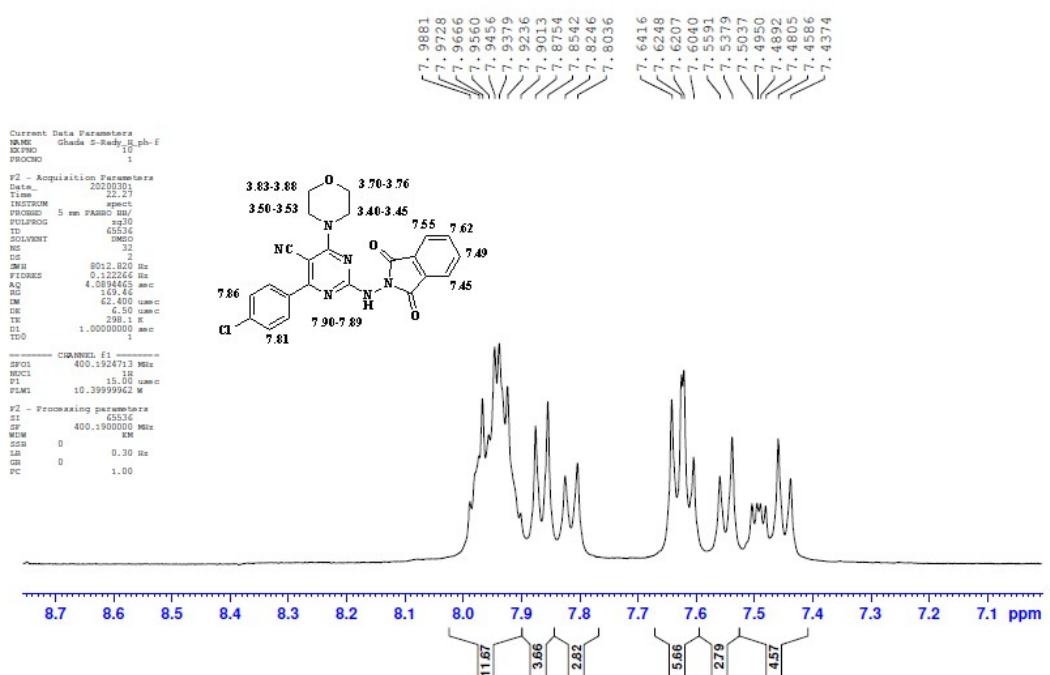

D2O

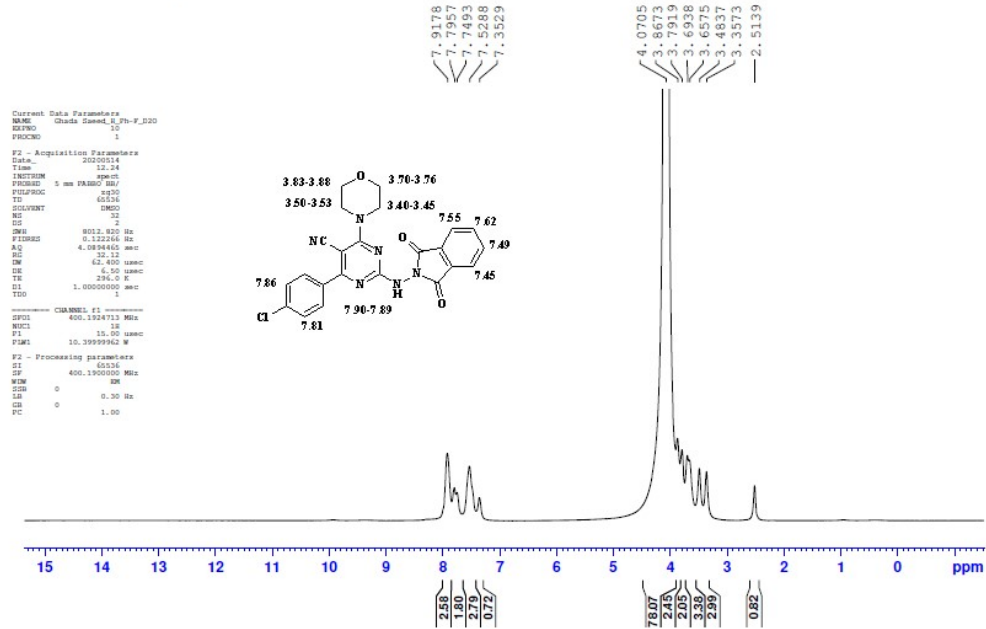

D2O

7.9178  
7.7957  
7.7493  
7.5288  
7.3529

Current Data Parameters  
NAME Chda\_Seed\_10\_P\_D2O  
EXPNO 1  
PROCNO 1  
F2 - Acquisition Parameters  
Date\_ 20200514  
Time 12.14  
INSTRUM spect  
PROBHD 5 mm VAMC QNP  
PULPROG zgpg30  
TD 65536  
SOLVENT DMSO  
SI 32  
SF 400.1464000 MHz  
WDW EM  
SSB 0  
FIRING 0.322266 Hz  
AQ 4.938465 sec  
RG 32.12  
CW 62.400 uspc  
DE 6.50 uspc  
TE 300.2 K  
D1 1.00000000 sec  
TD 1  
----- CHANNEL f1 -----  
SFO1 400.1464113 MHz  
NUC1 15  
P1 15.00 uspc  
FREQ 10.3999962 MHz  
F2 - Processing parameters  
SI 65536  
SF 400.1464000 MHz  
WDW EM  
SSB 0  
LB 0.30 Hz  
GB 0  
PC 1.00

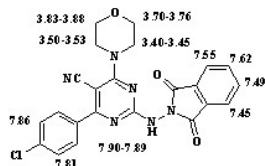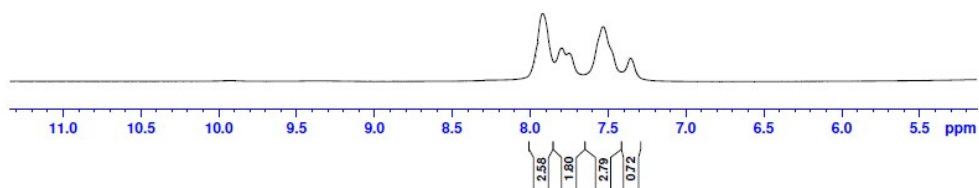



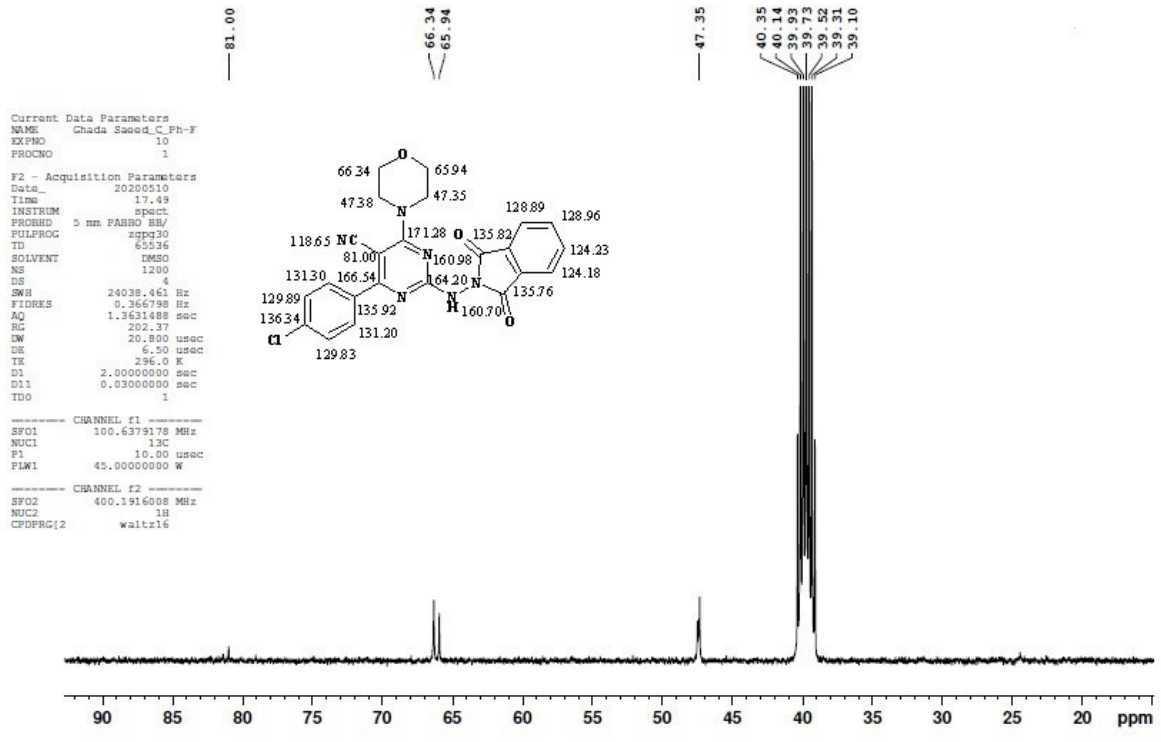

# The mass spectrum of compound 10

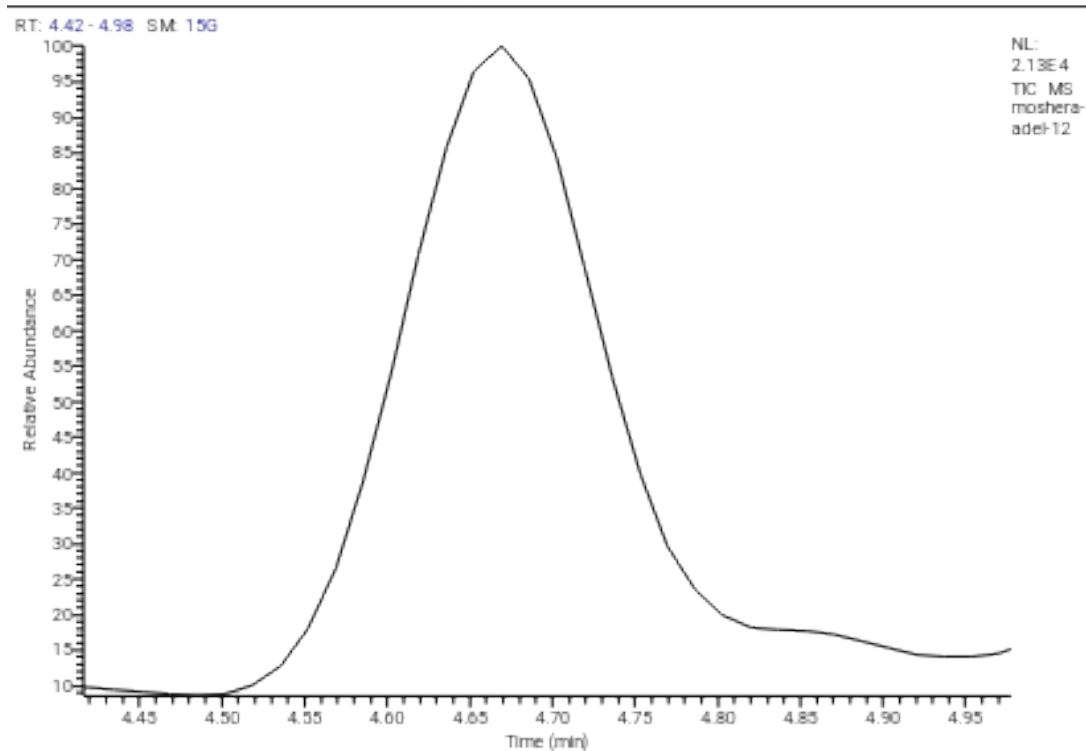

moshera-adel-12 #180 RT: 3.03 AV: 1 SB: 2 4.45, 4.45 NL: 6.04E2  
T: {0,0} + c EI Full ms [40.00-1000.00]

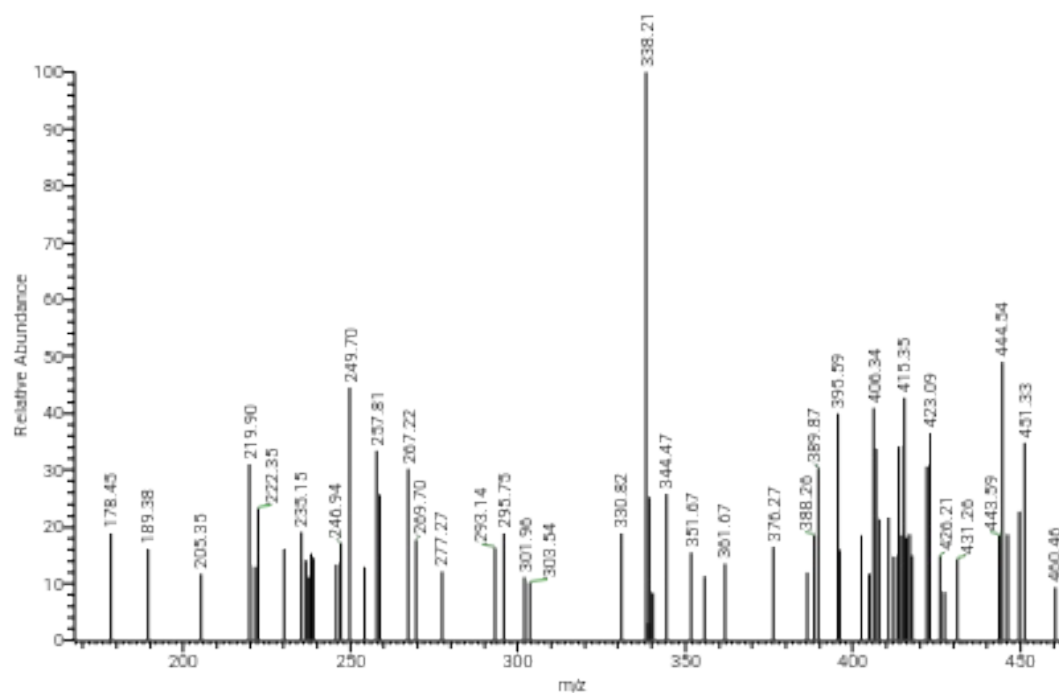

# Spectral data of compound 11a

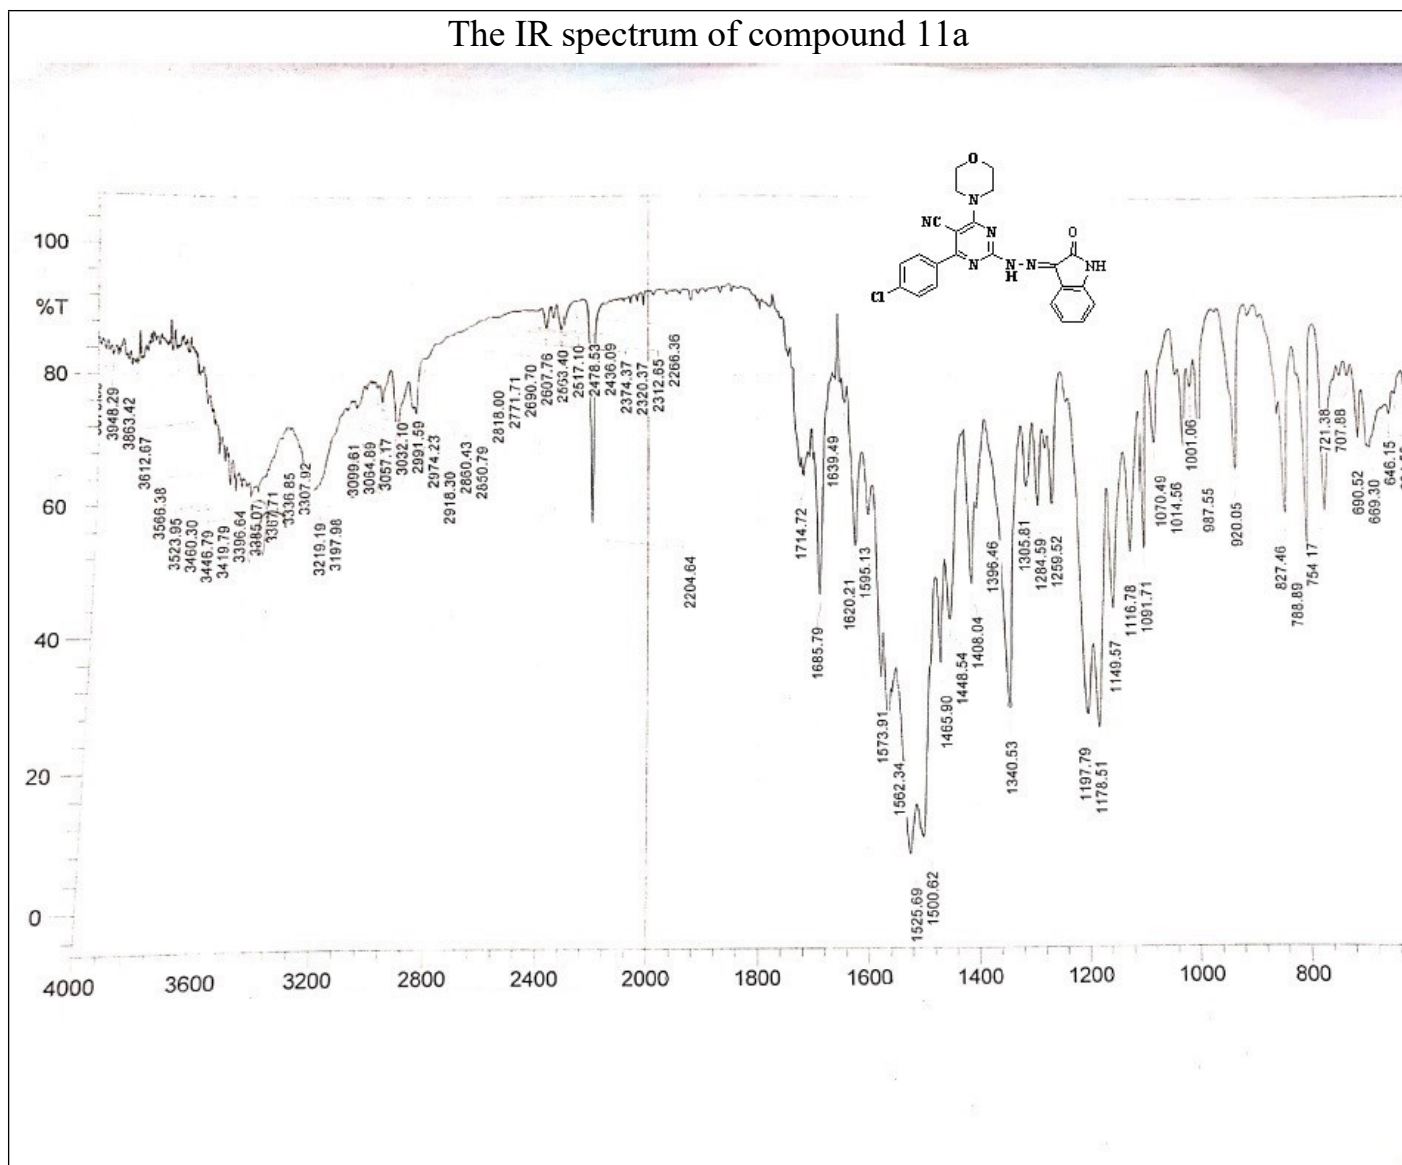



# The <sup>1</sup>H NMR spectrum of compound 11a

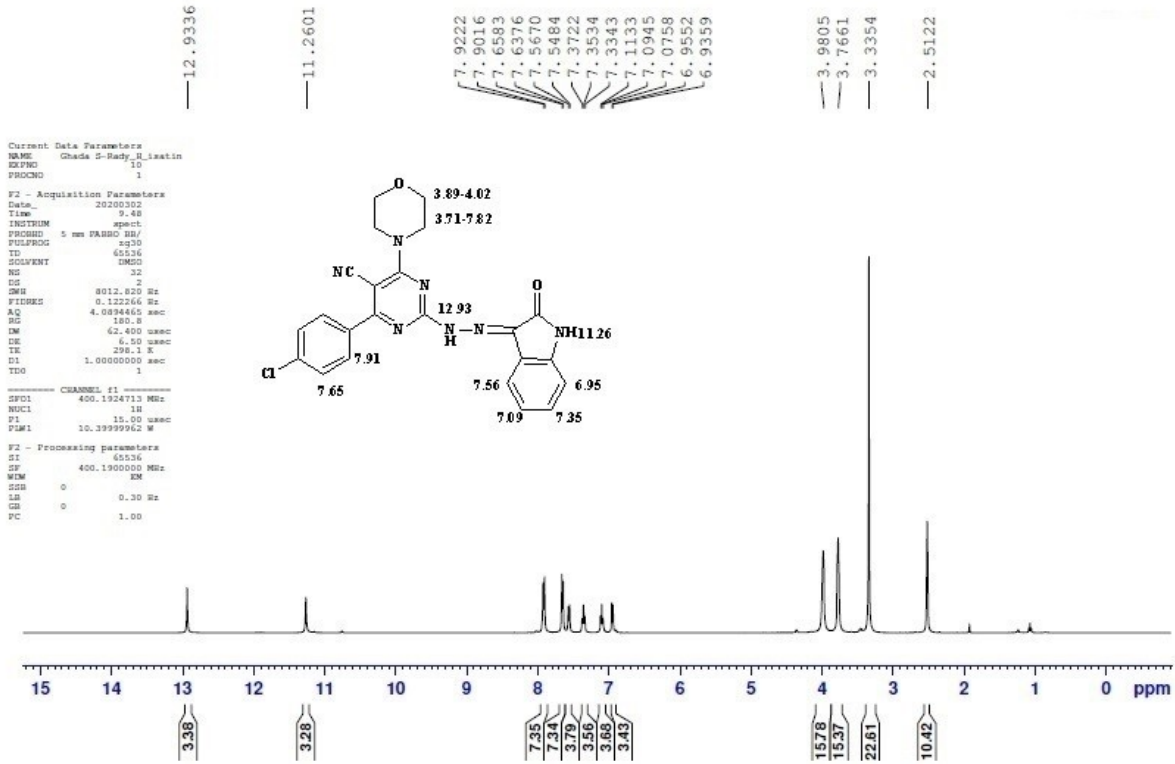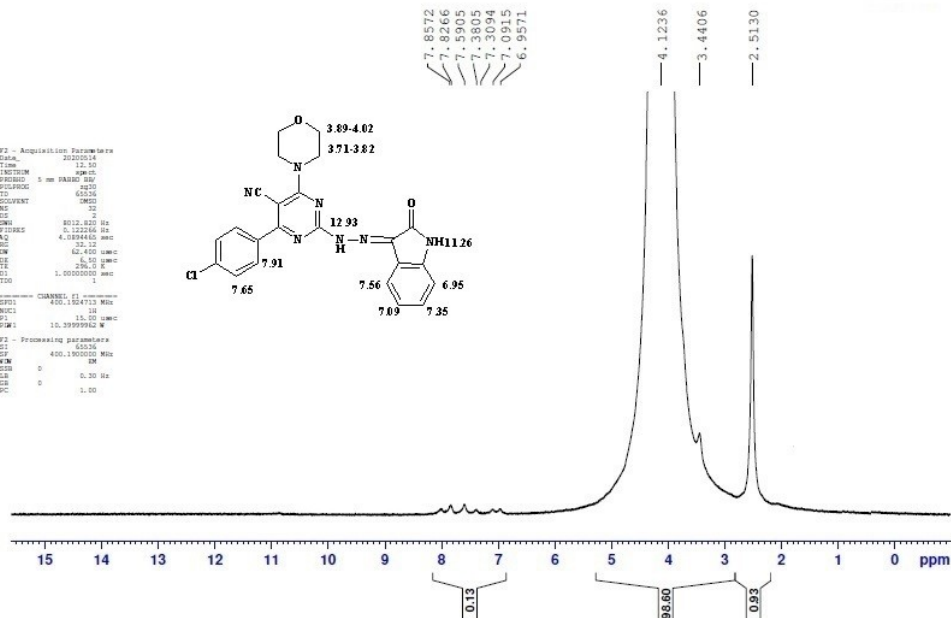

D2O

Microanalytical Unit - FOPCU - NMR laboratory  
www.pharma.cu.edu.eg dir-mau.fopcu@pharma.cu.edu.eg

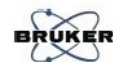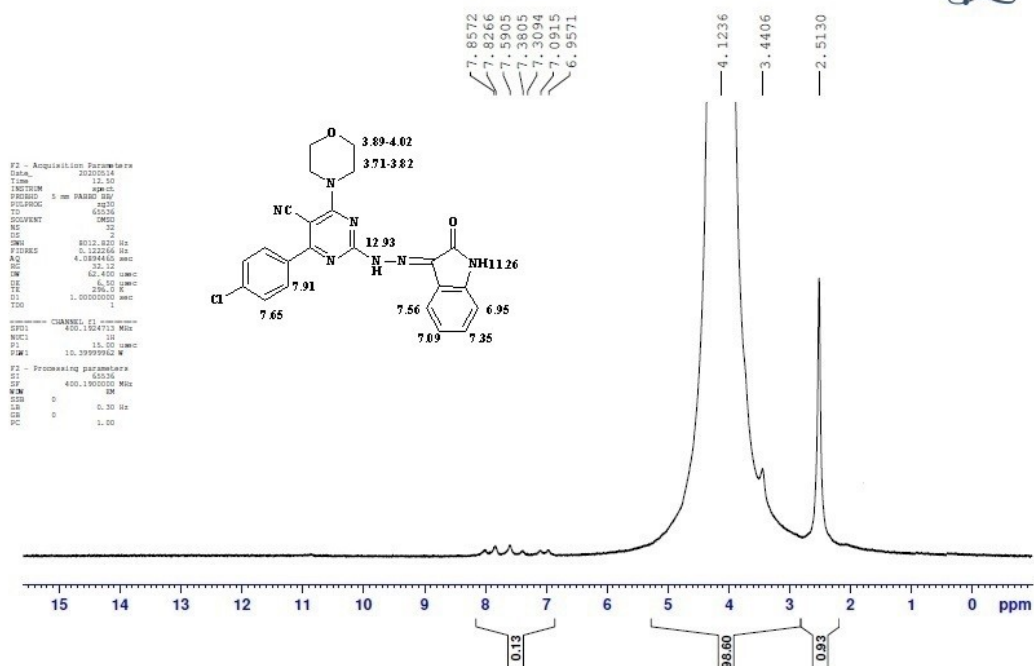

D2O

Current Data Parameters  
NAME Chada\_Saad\_H\_Isoatin\_D2O  
EXPNO 10  
PROCNO 1

F2 - Acquisition Parameters  
Date\_ 20200514  
Time 15.50  
INSTRUM spect  
PROBHD 5 mm PABBO BB  
PULPROG zg30  
TD 65536  
SFO1 400.1500000 MHz  
SOLVENT DMSO  
NS 32  
DS 2  
SWH 8012.820 Hz  
FIDRES 0.122266 Hz  
AQ 4.0894465 sec  
RG 32.12  
DM 62.400 usec  
DE 6.50 usec  
TE 296.2 K  
D1 1.0000000 sec  
TD 1

==== CHANNEL 1 =====  
SFO1 400.1524713 MHz  
NUC1 1H  
P1 15.00 usec  
P1M1 10.29999962 W  
F2 - Processing parameters  
SI 65536  
SF 400.1500000 MHz  
WDW EM  
SSB 0 0.30 Hz  
GB 0  
PC 1.00

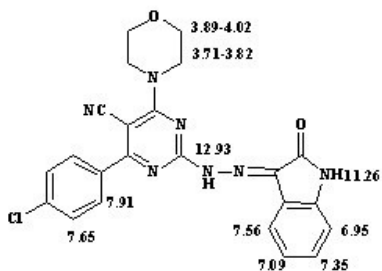

7.8572  
7.8266  
7.5905  
7.3805  
7.3094  
7.0915  
6.9571

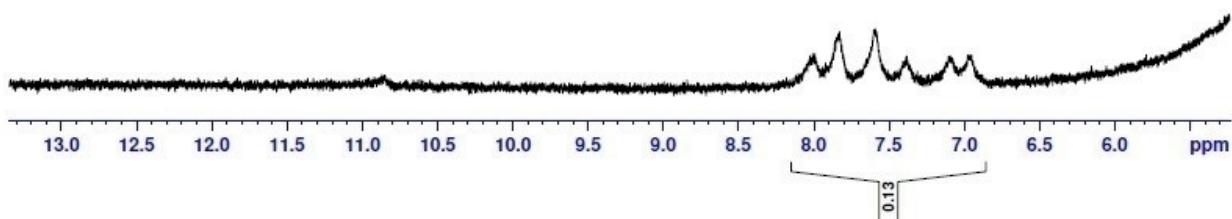

# The <sup>13</sup>C NMR spectrum of compound 11a

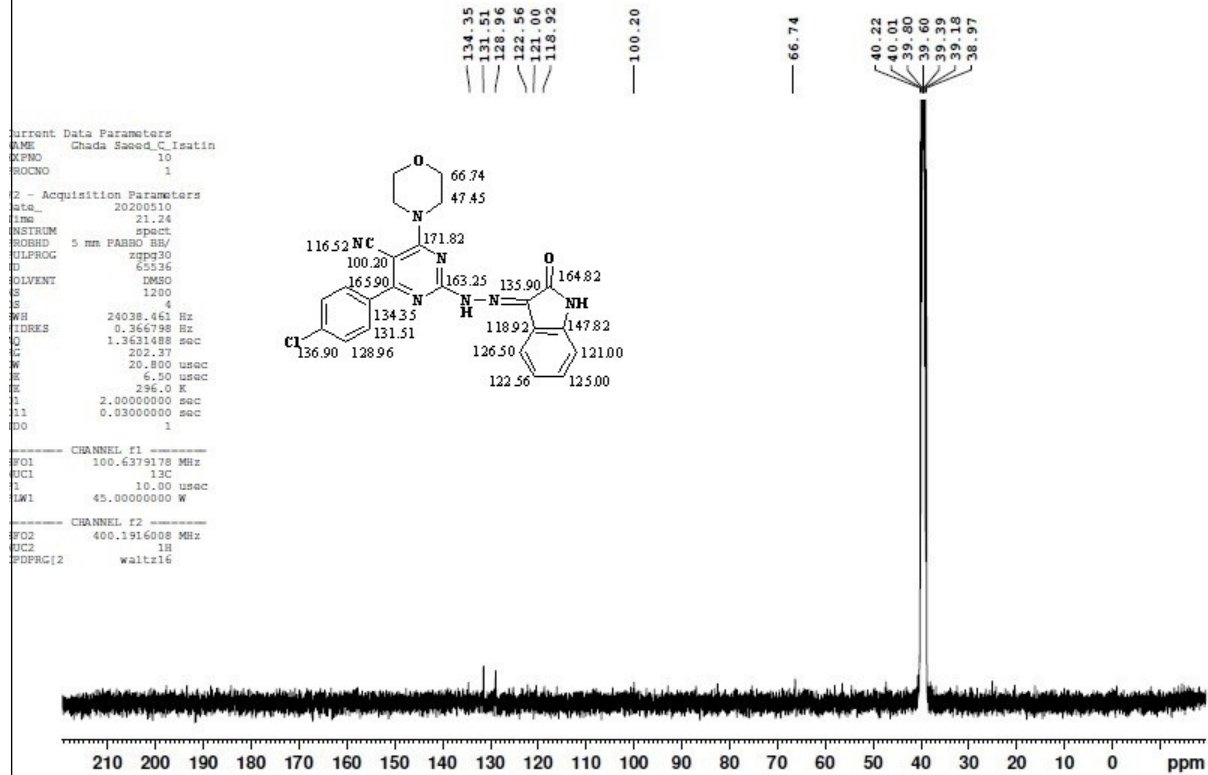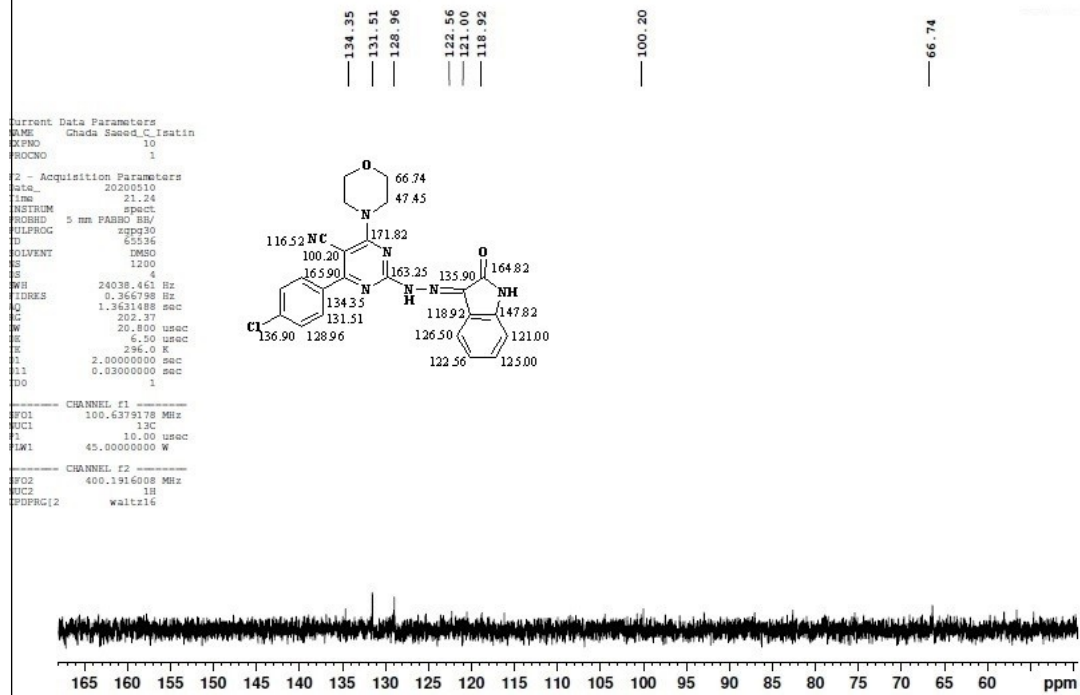

# The mass spectrum of compound 11a

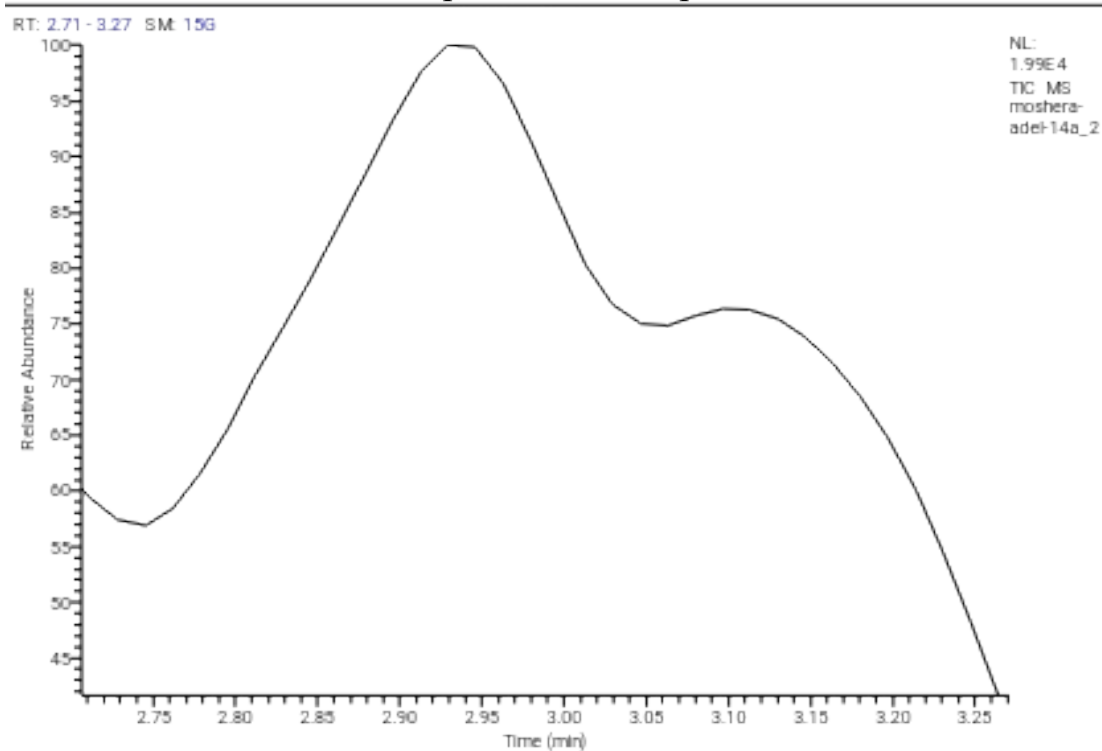

moshera-adel-14a\_2 #173 RT: 2.91 AV: 1 SB: 2 4.44, 4.44 NL: 3.01E2  
T: {0,0} + c EI Full ms [40.00-1000.00]

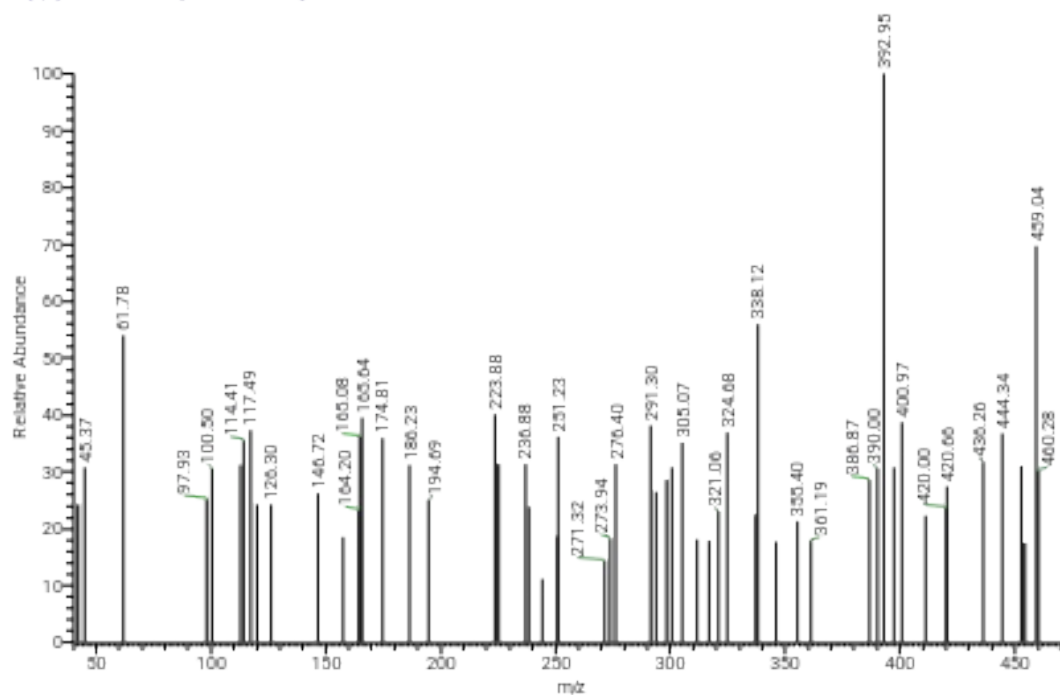

# Spectral data of compound 11b

## The IR spectrum of compound 11b

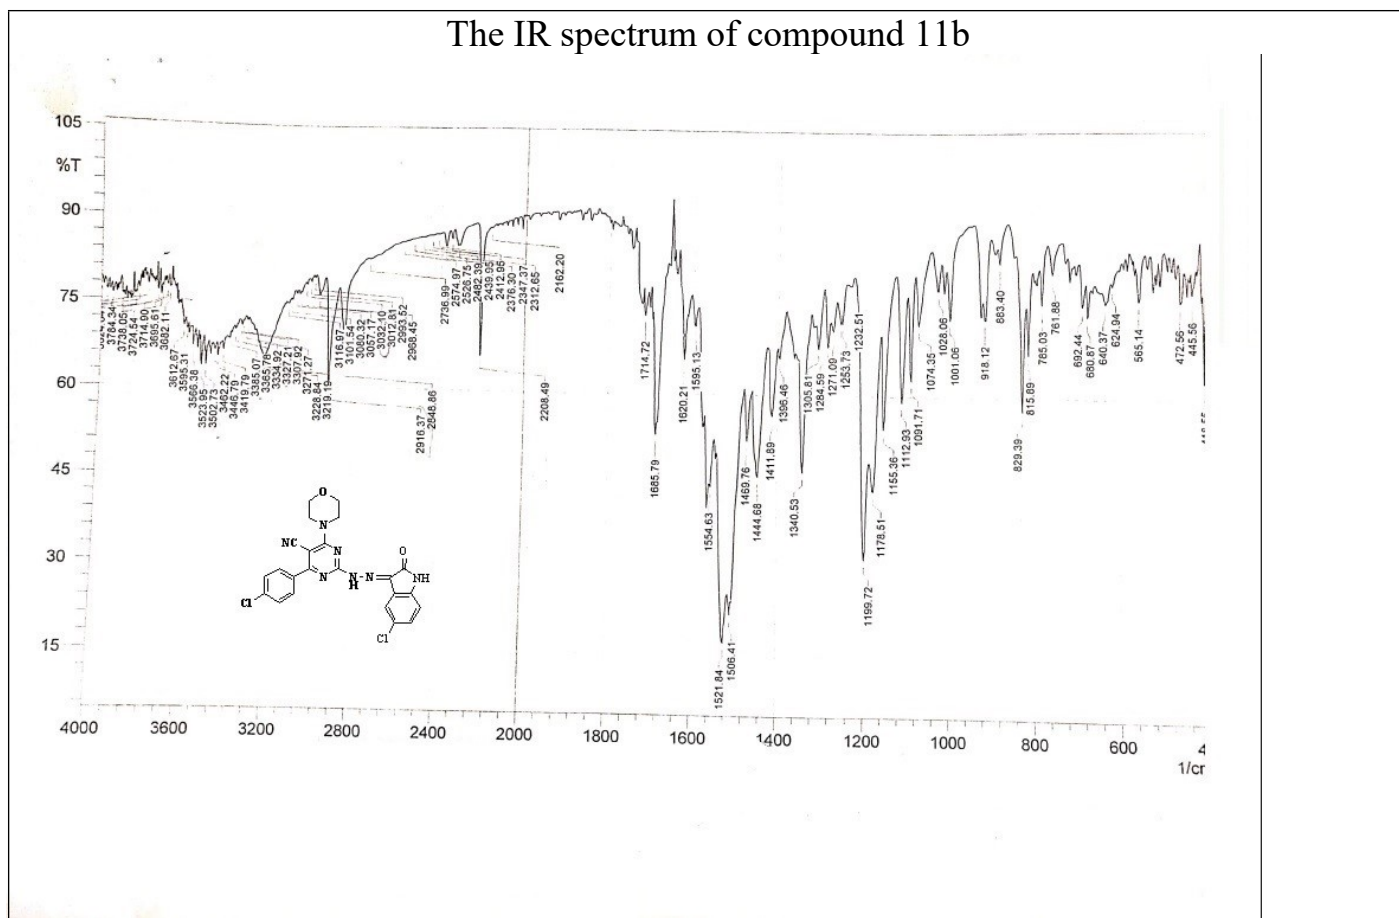

# The <sup>1</sup>H NMR spectrum of compound 11b

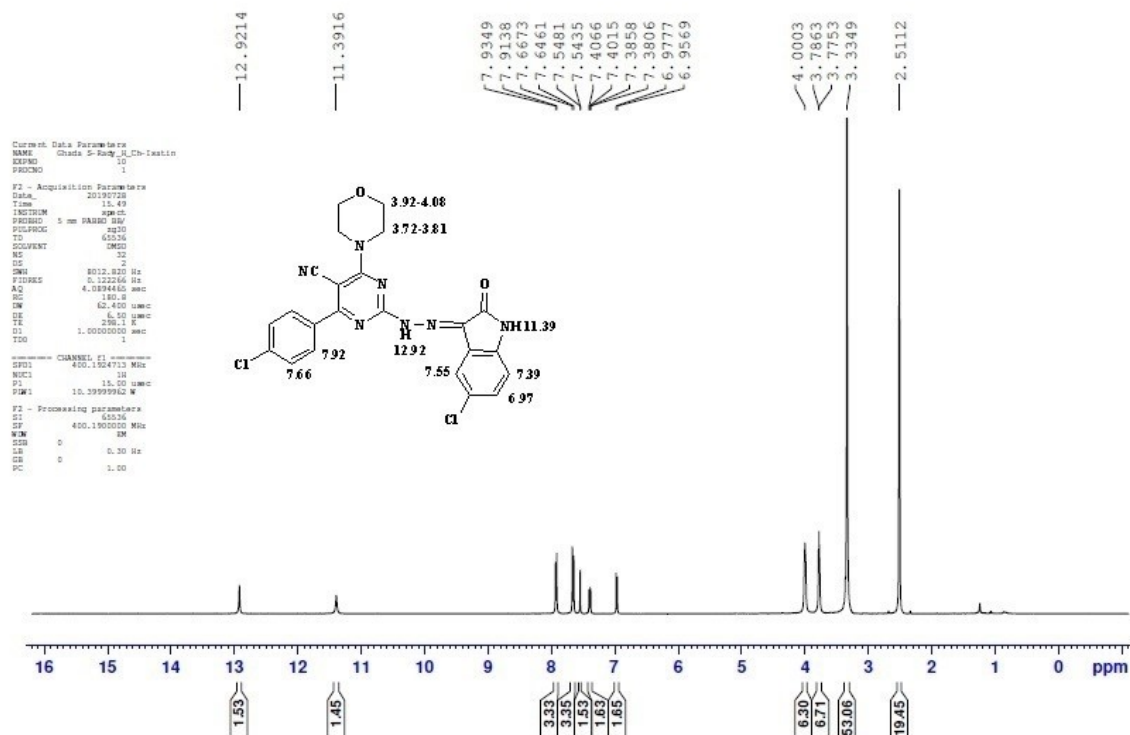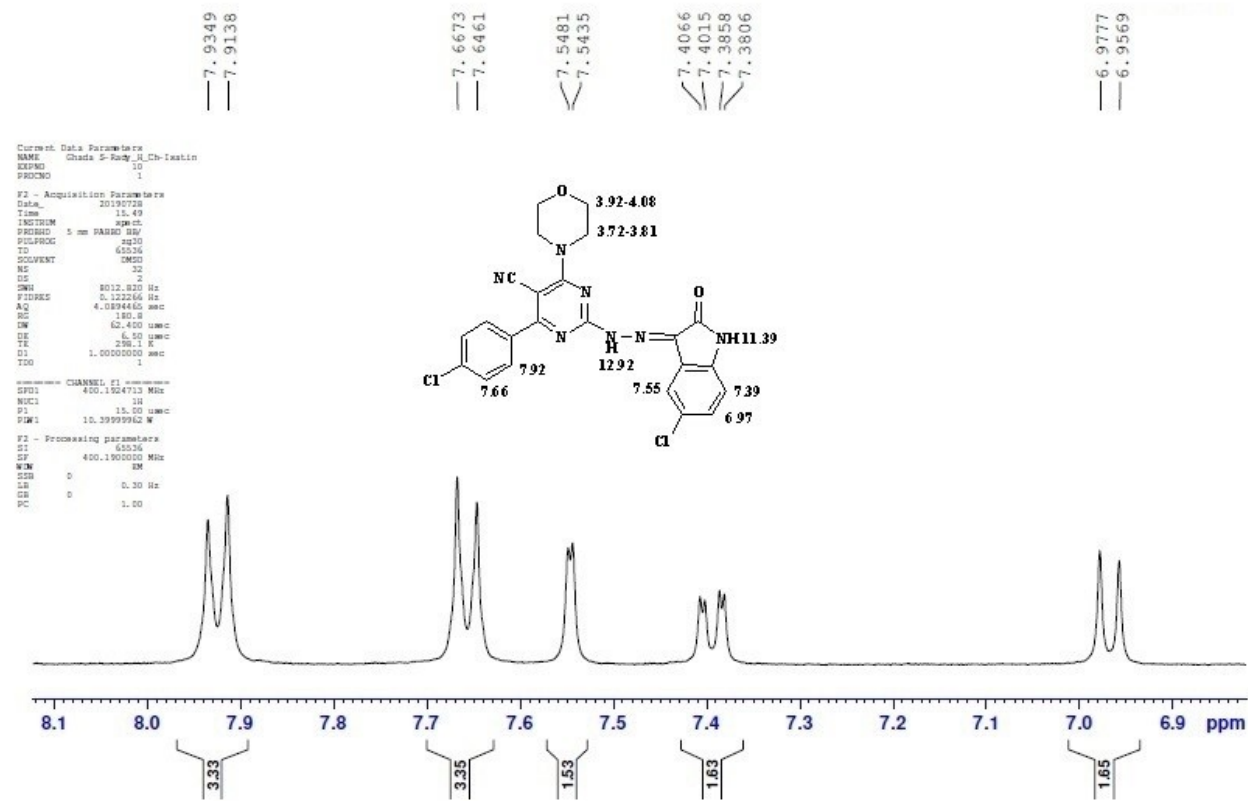

Current Data Parameters  
 NAME Chada 5-Roxy\_H\_Cb-Iustin  
 EXPNO 10  
 PROCNO 1

F2 - Acquisition Parameters  
 Date\_ 20190728  
 Time 15.49  
 INSTRUM spect  
 PULPROG zgpg30  
 TO 65236  
 SOLVENT DMSO  
 NS 32  
 DS 2  
 SWH 8012.820 Hz  
 FIDRES 0.122266 Hz  
 AQ 4.089465 sec  
 RG 180.8  
 SW 52.400 umc  
 DE 6.50 umc  
 TE 300.2 K  
 D1 1.0000000 sec  
 TDG 1

===== CHANNEL f1 =====  
 SF01 400.1804713 MHz  
 NUCL1 1H  
 P1 15.00 umc  
 PLW1 10.59999962 W

F2 - Processing parameters  
 SI 65236  
 SF 400.1800000 MHz  
 WM 2M  
 SSB 0  
 LB 0.30 Hz  
 GB 0  
 PC 1.00

— 12.9214

— 11.3916

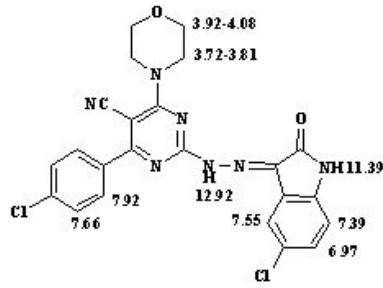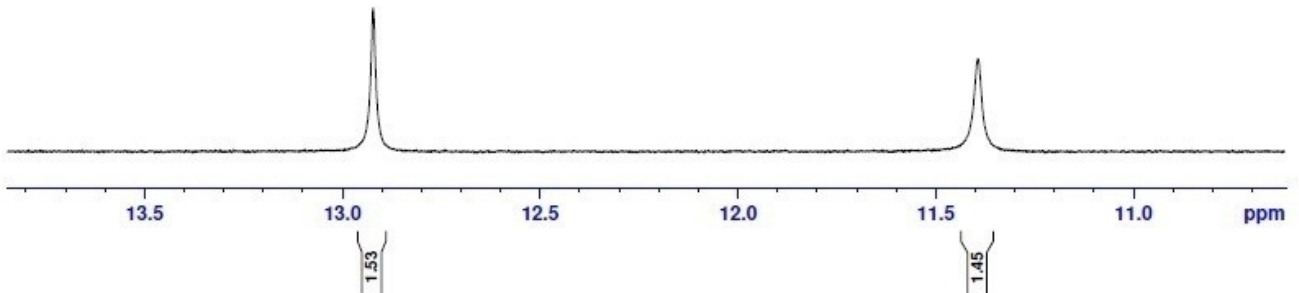

D2O

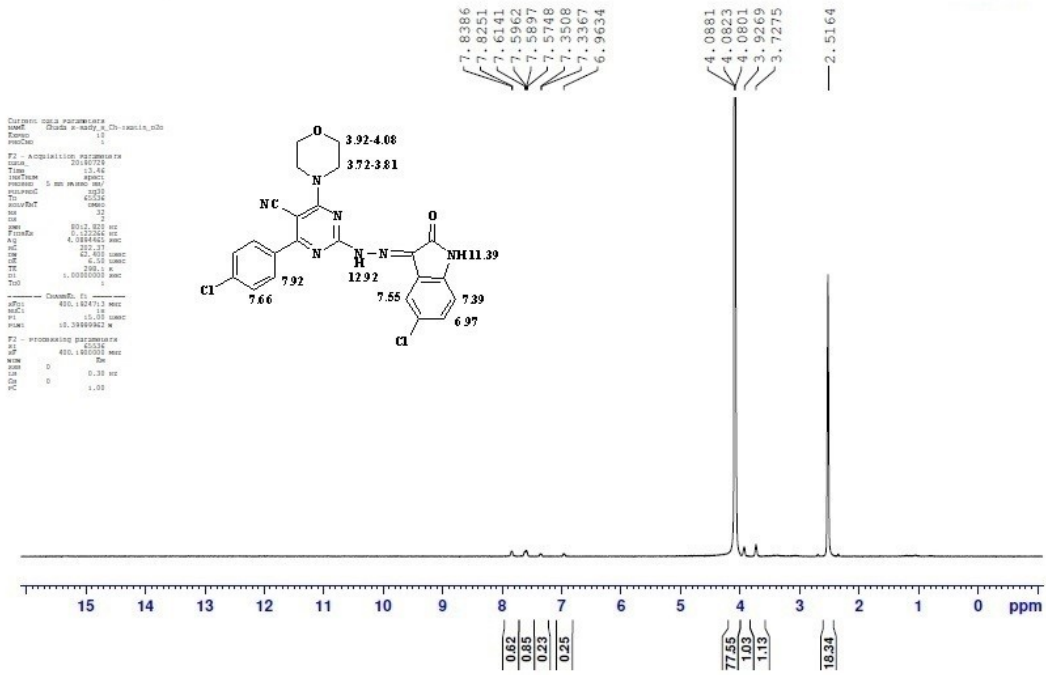

D2O

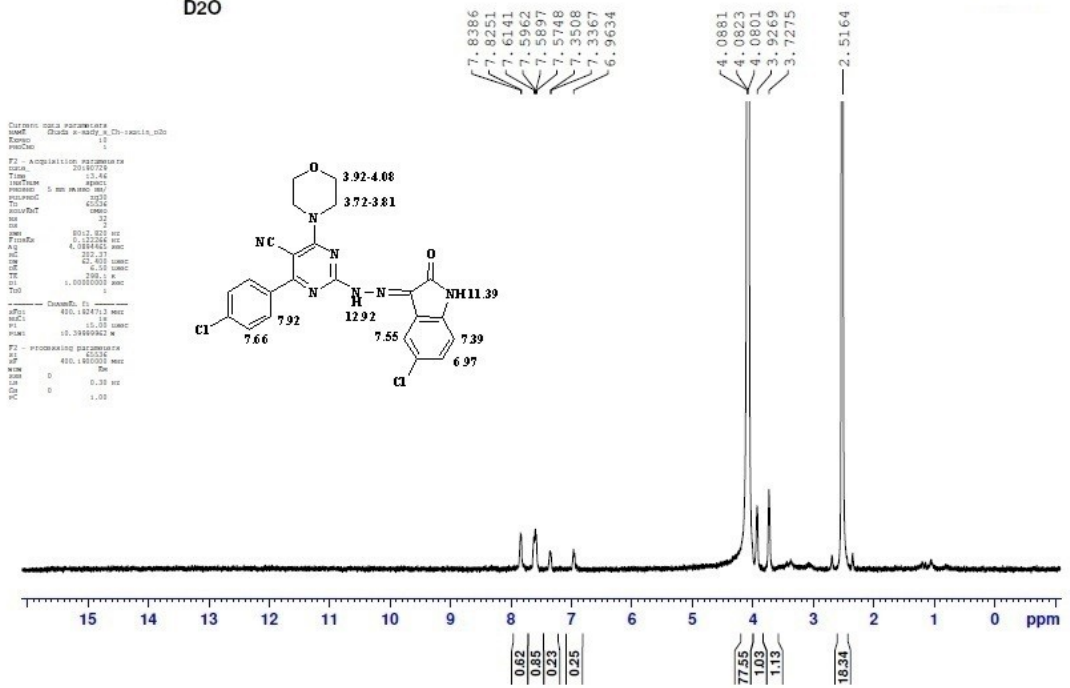



# The <sup>13</sup>C NMR spectrum of compound 11b

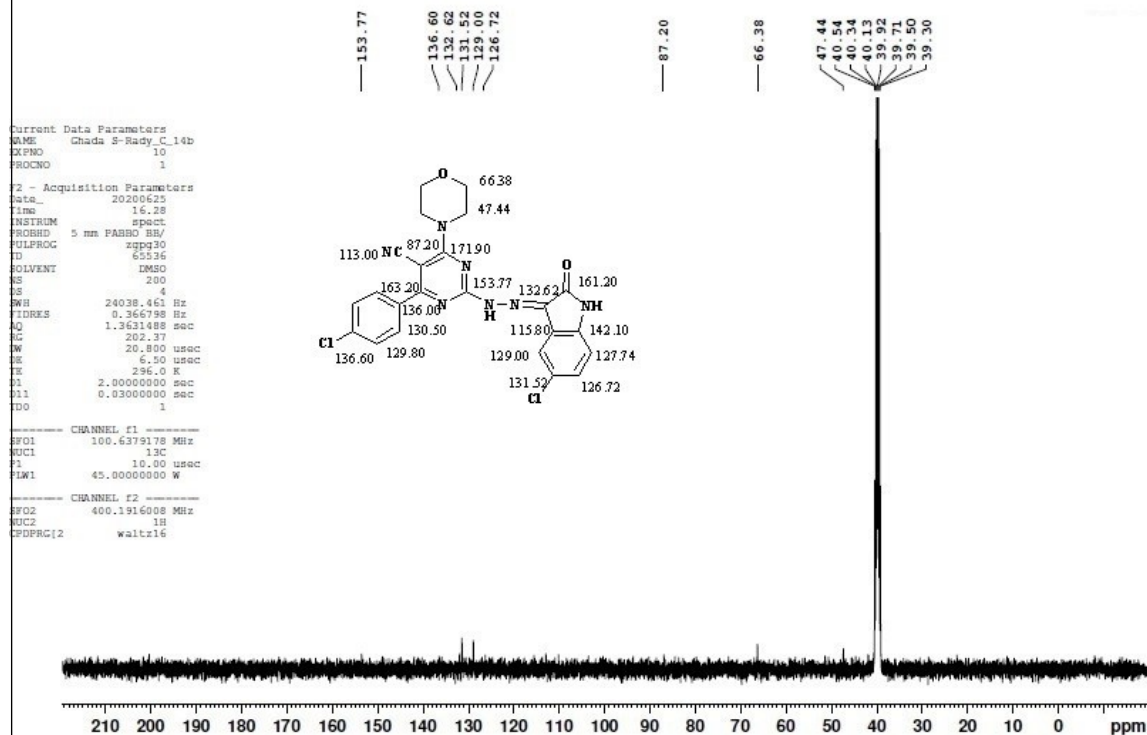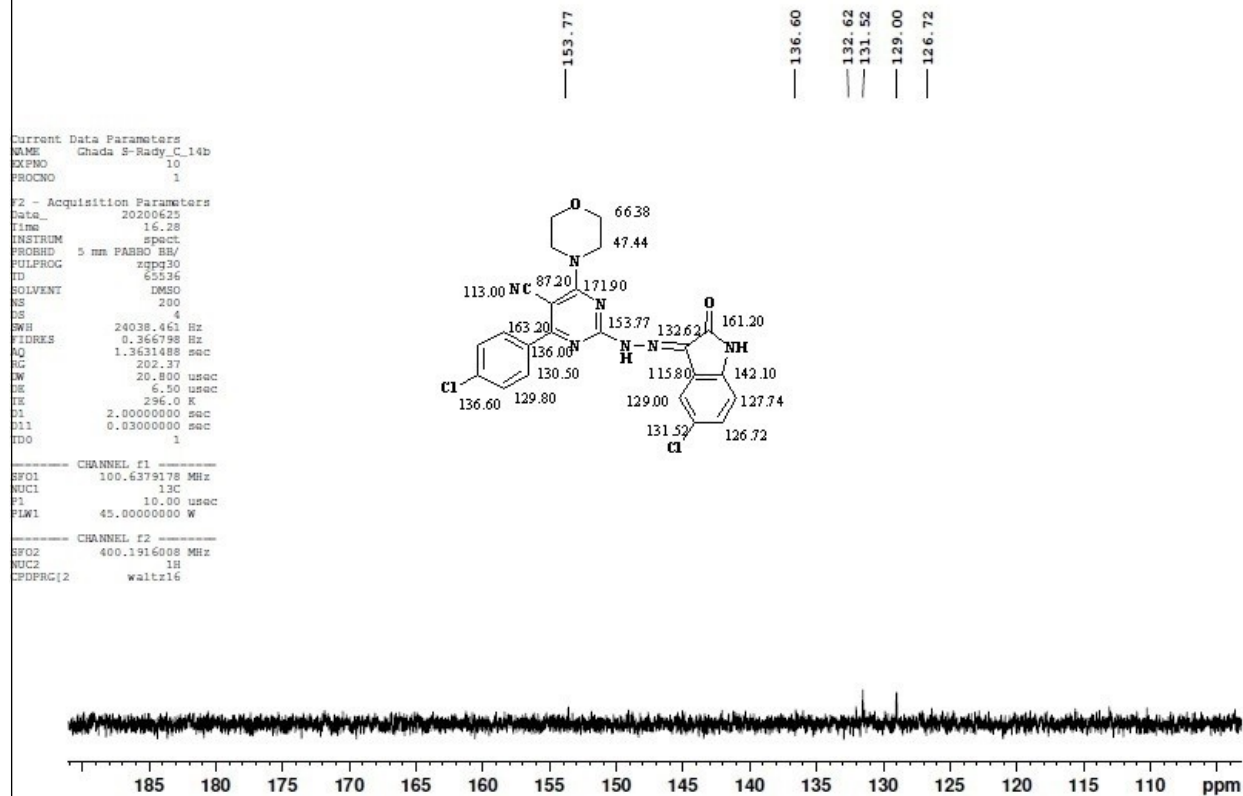

# The mass spectrum of compound 11b

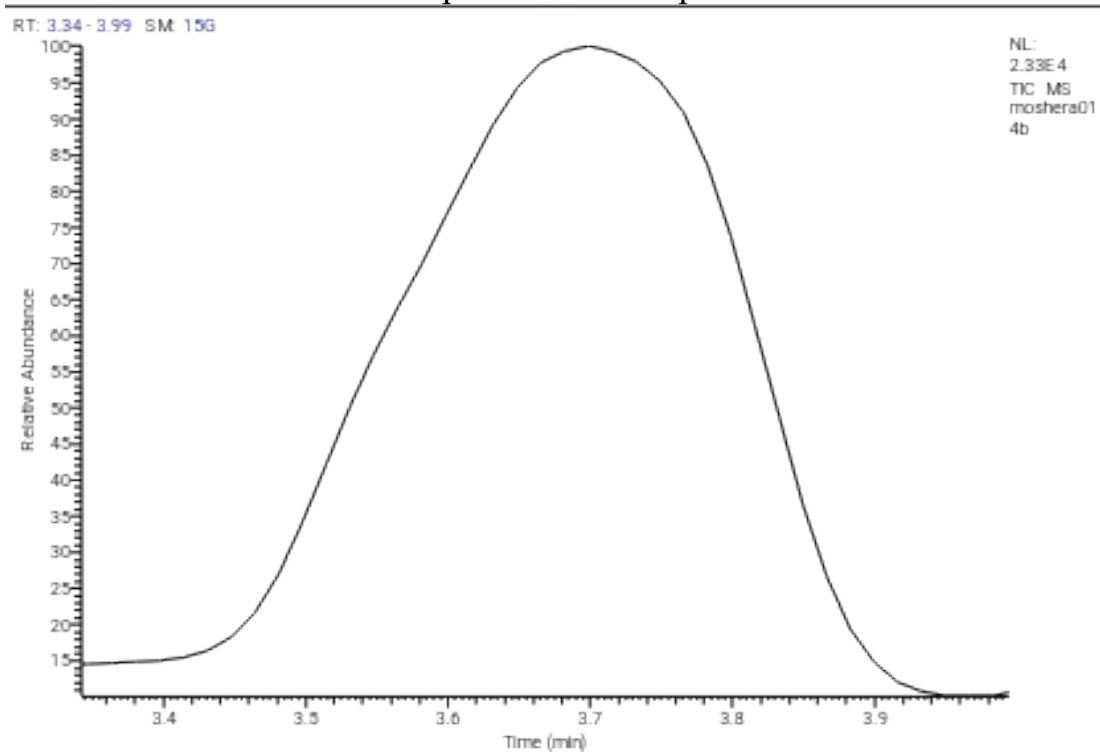

moshera014b #293 RT: 4.92 AV: 1 SB: 2 4.45, 4.45 NL: 2.67E2  
T: {0,0} + c EI Full ms [40.00-1000.00]

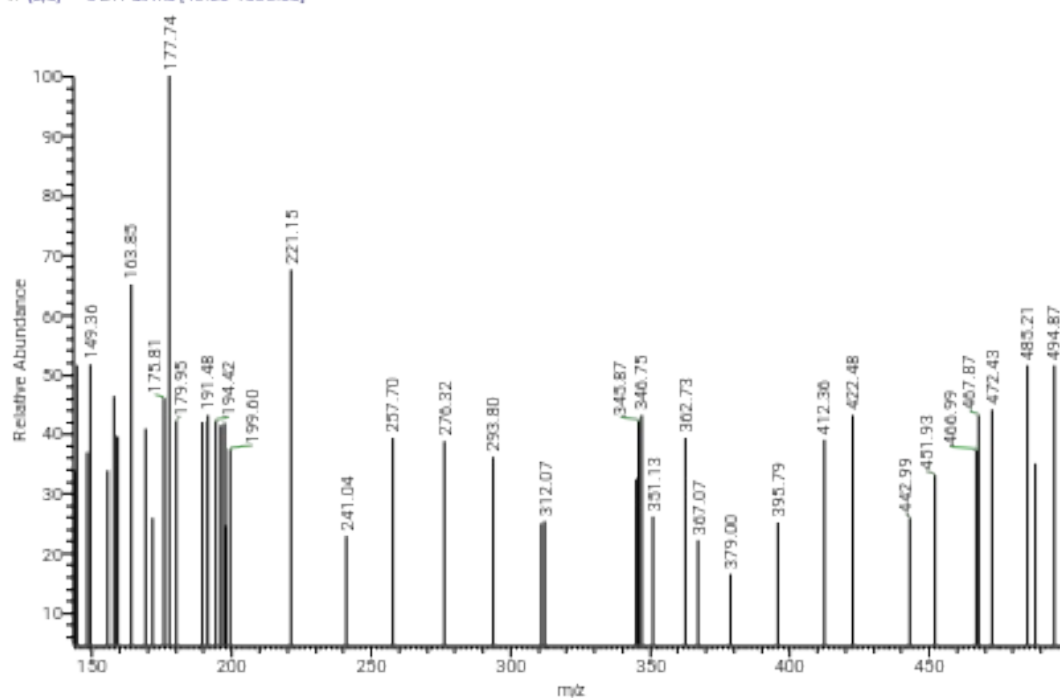

## Spectral data of compound 11c

The IR spectrum of compound 11c

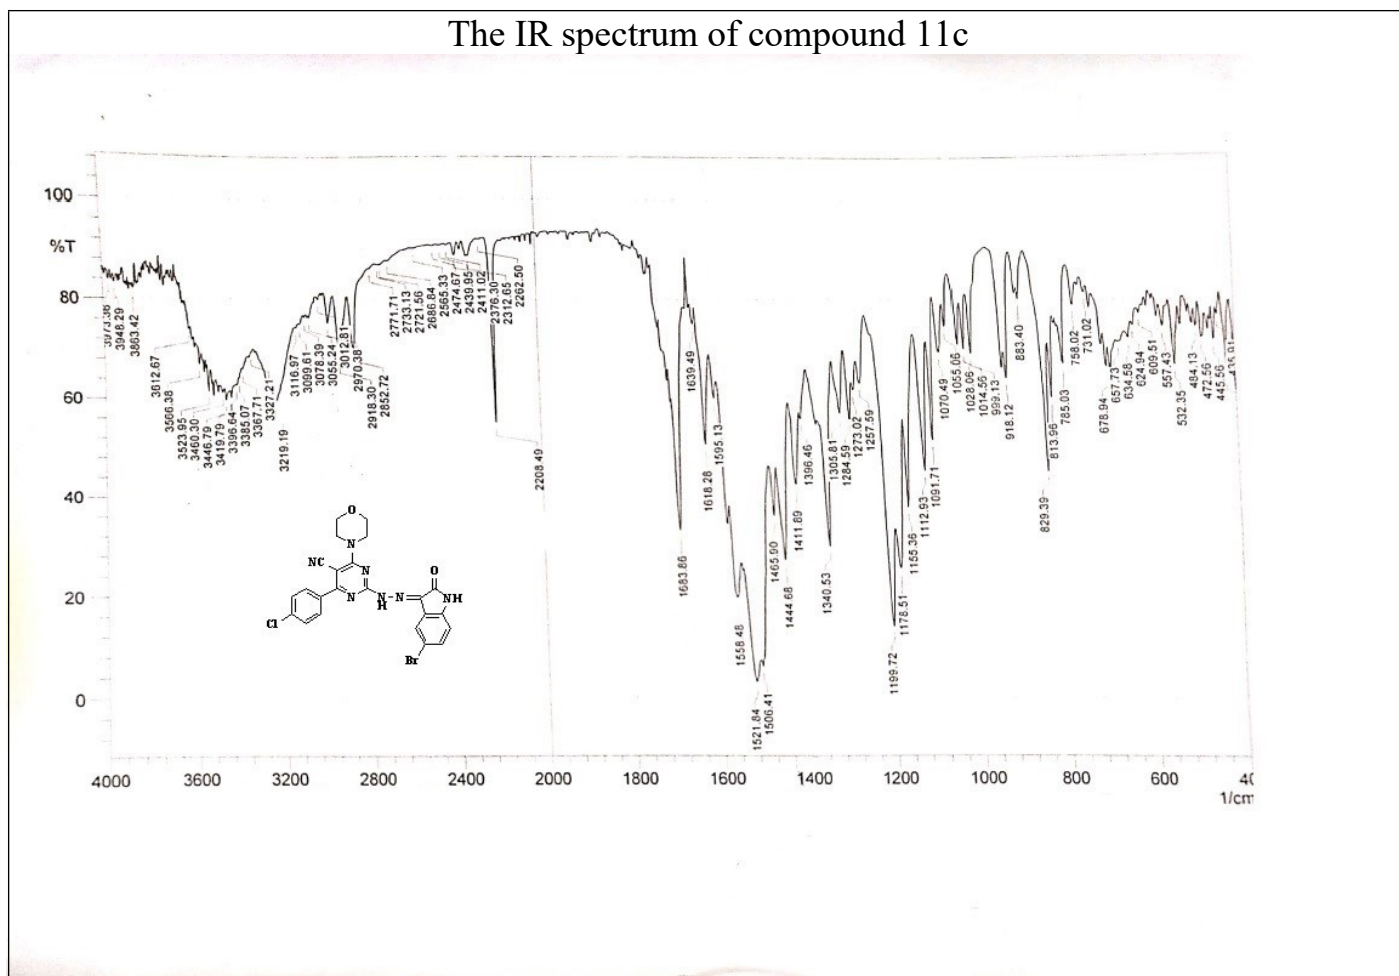

# The <sup>1</sup>H NMR spectrum of compound 11c

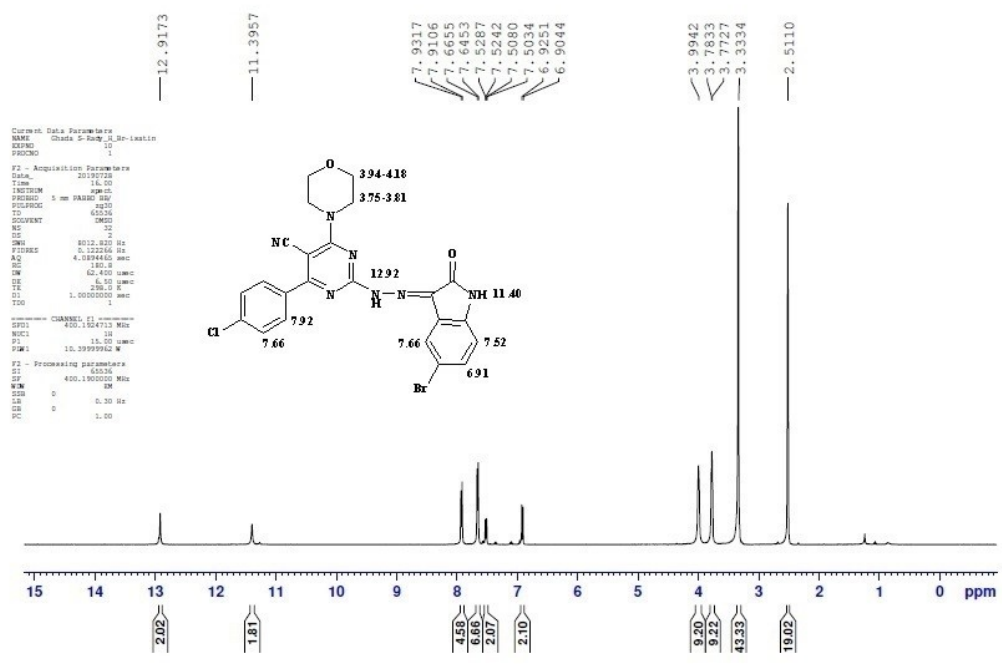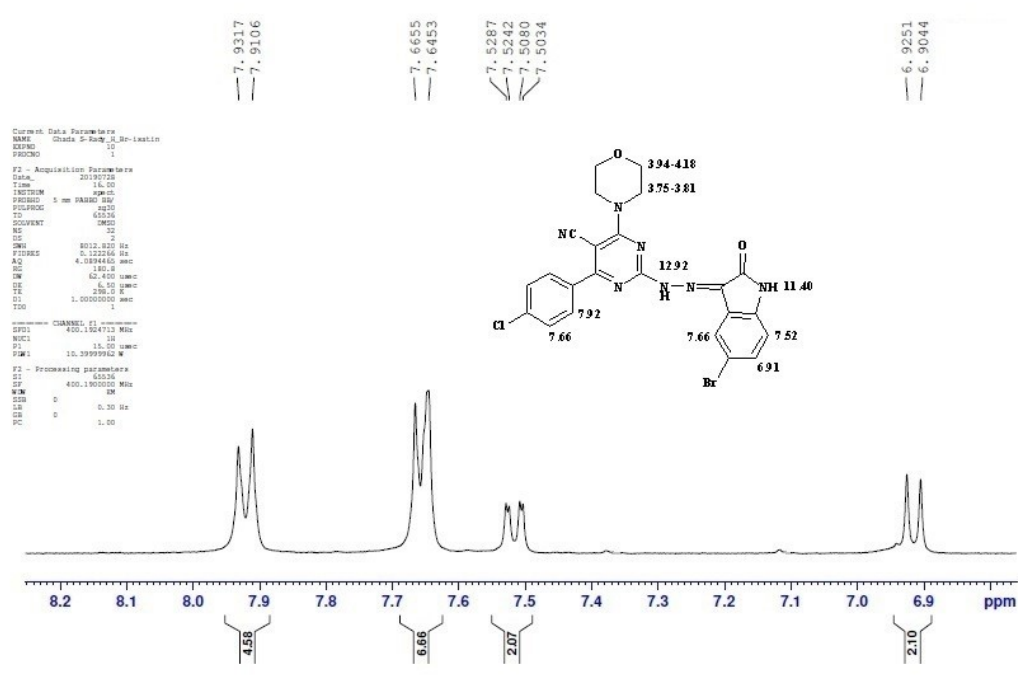

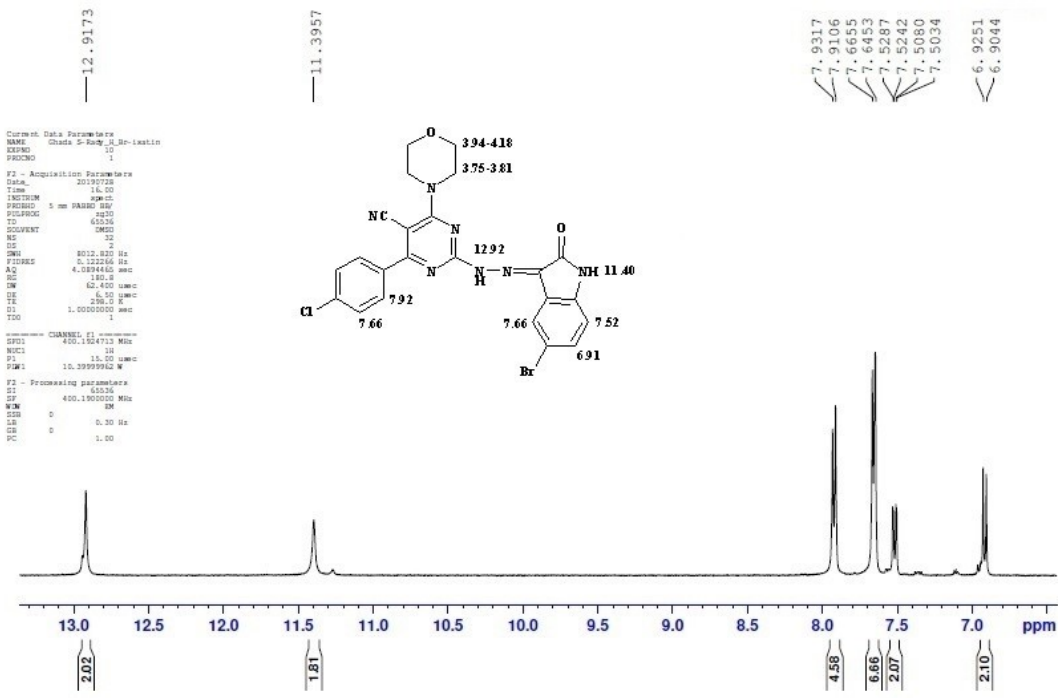

D2O

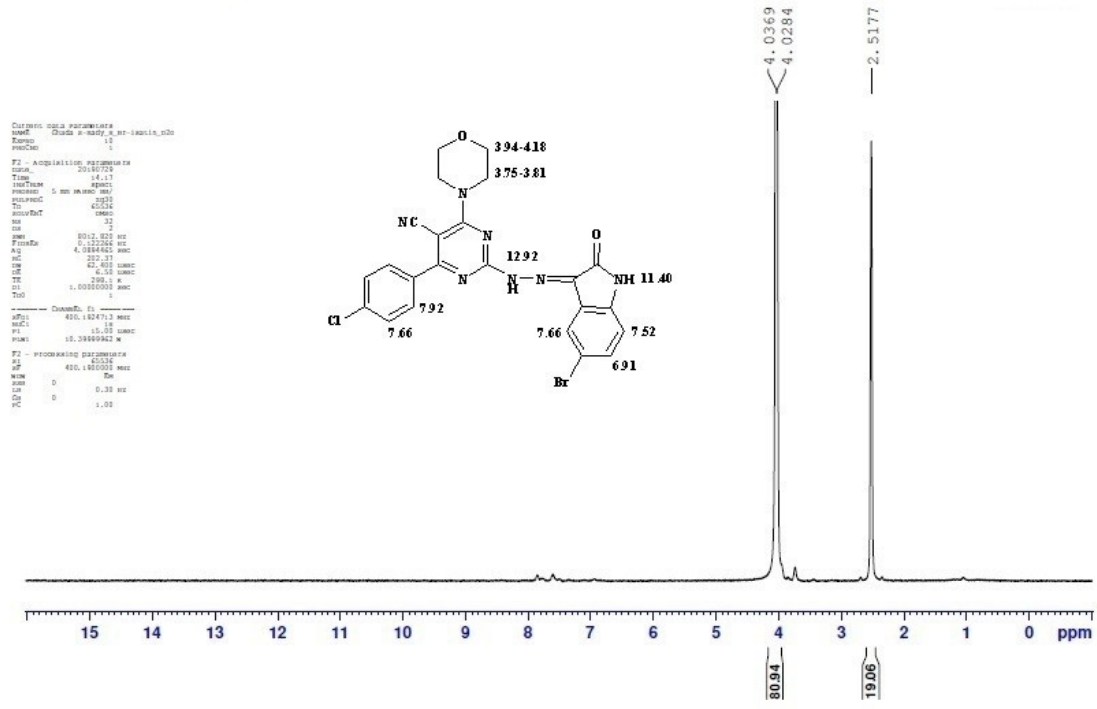

# The <sup>13</sup>C NMR spectrum of compound 11c

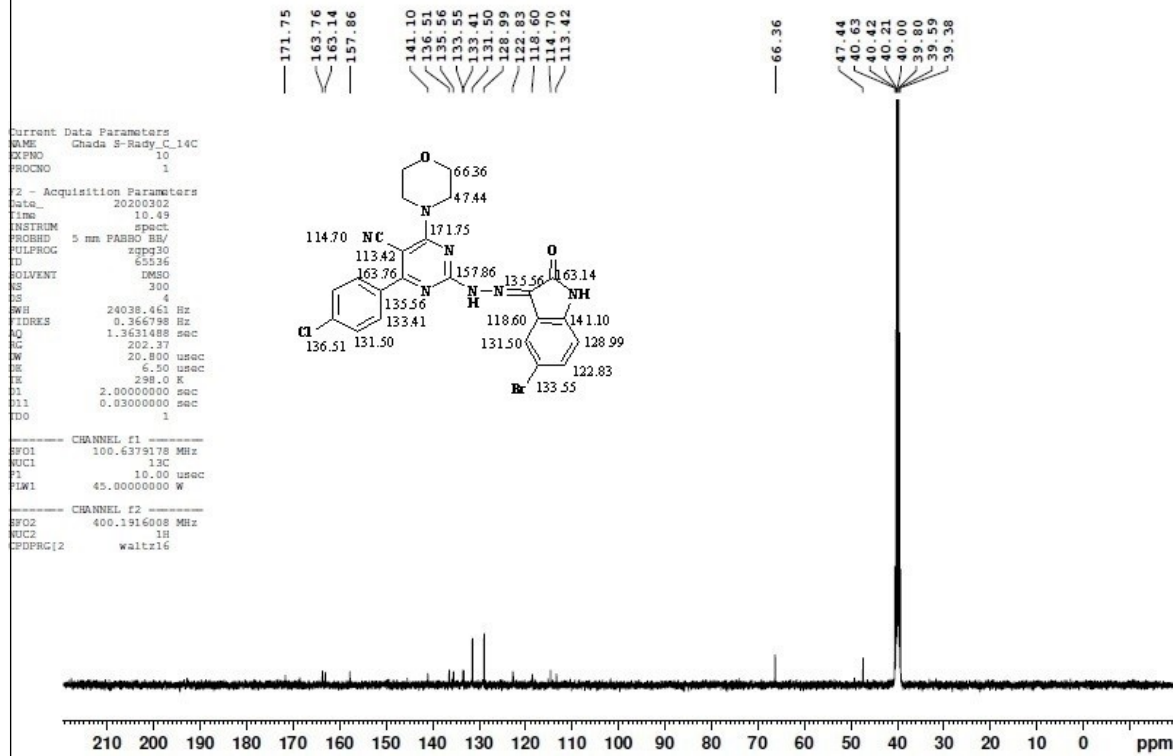

Ghada S-Rady\_C\_14C

Microanalytical Unit - FOPCU - NMR laboratory  
www.pharma.cu.edu.eg dir-mau.fopcu@pharma.cu.edu.eg

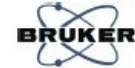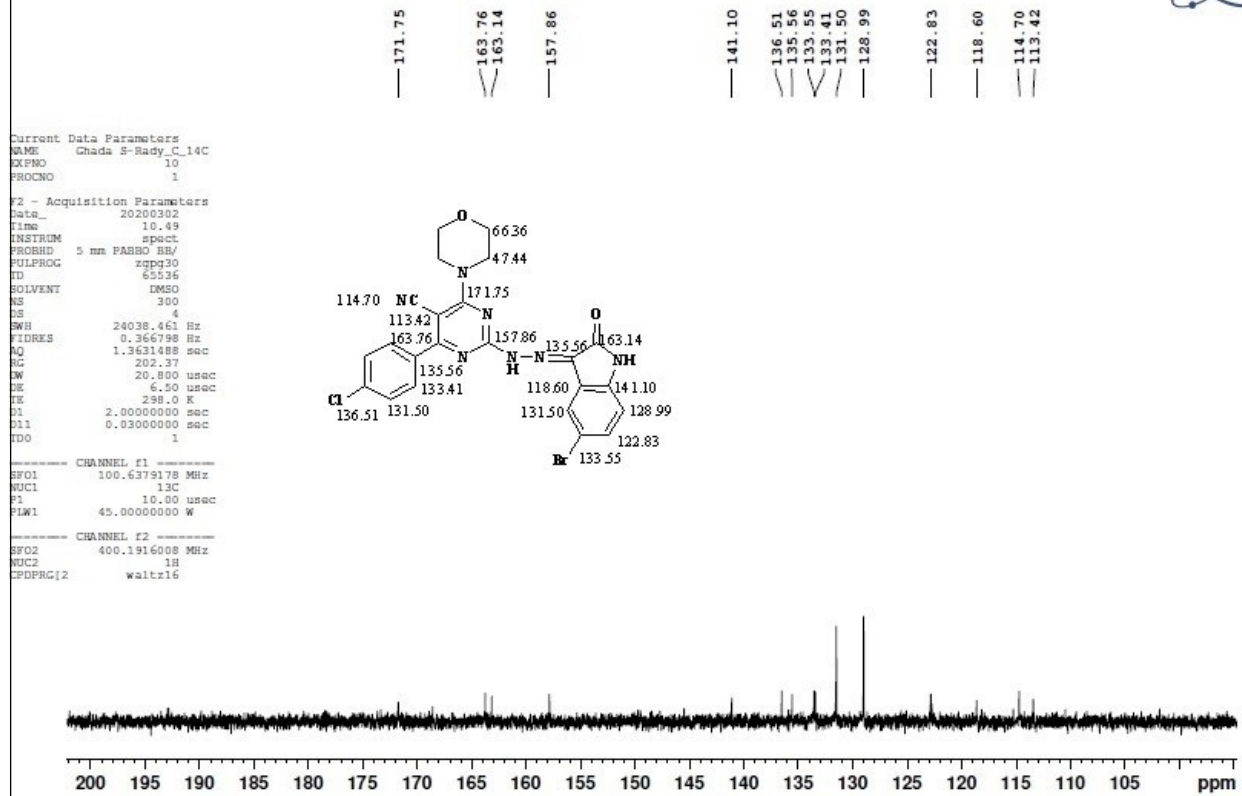



# The mass spectrum of compound 11c

RT: 2.31 - 2.68 SM: 15G

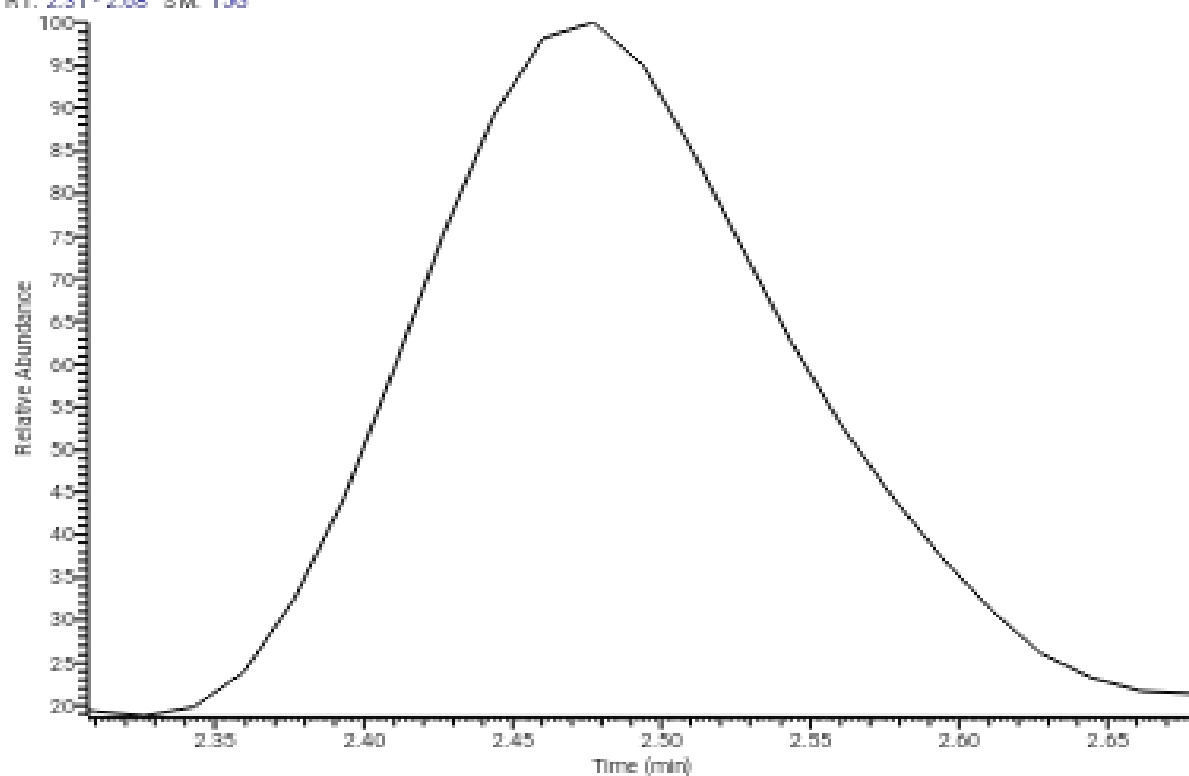

NL:  
1.00E4  
TIC MS  
moshera-  
adel-14c\_2

moshera-adel-14c\_2 #147 RT: 2.48 AV: 1 SB: 2 3.05, 3.58 NL: 3.69E2

T: {0,0} + c EI Full ms [40.00-1000.00]

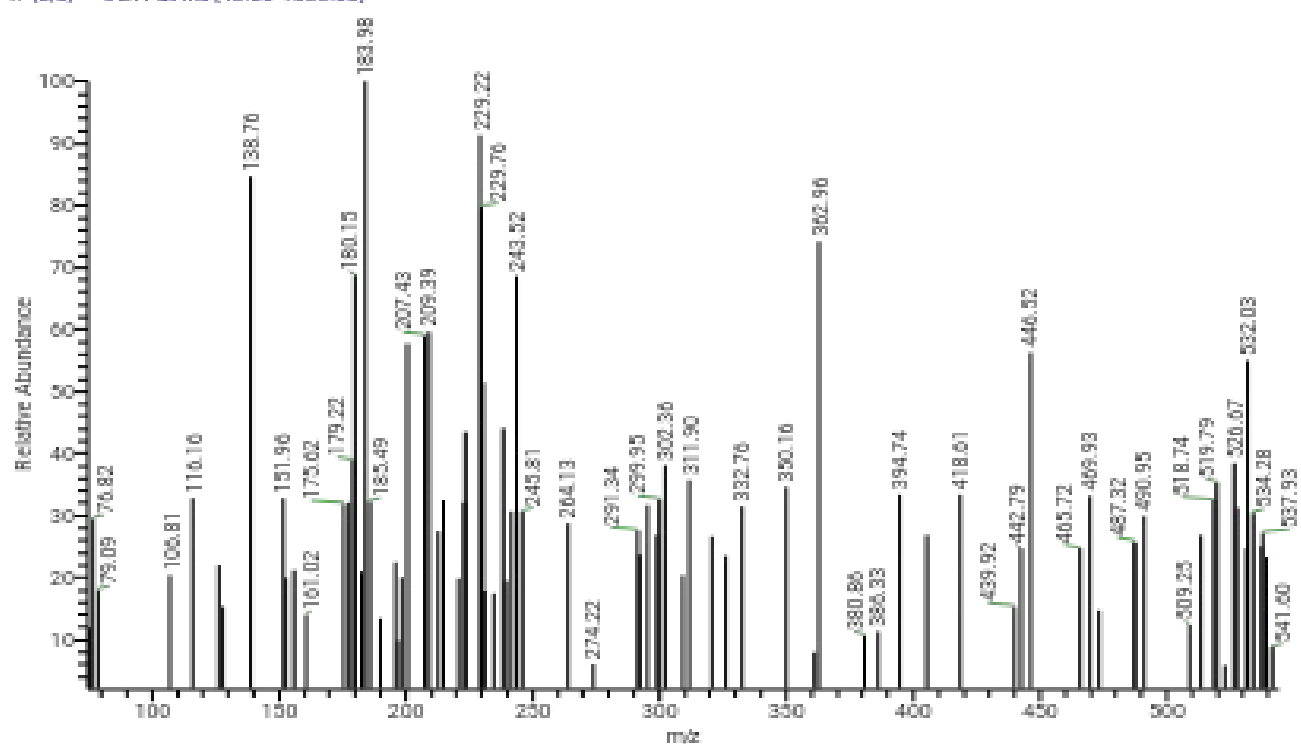



# Spectral data of compound 12 a

## The IR spectrum of compound 12 a

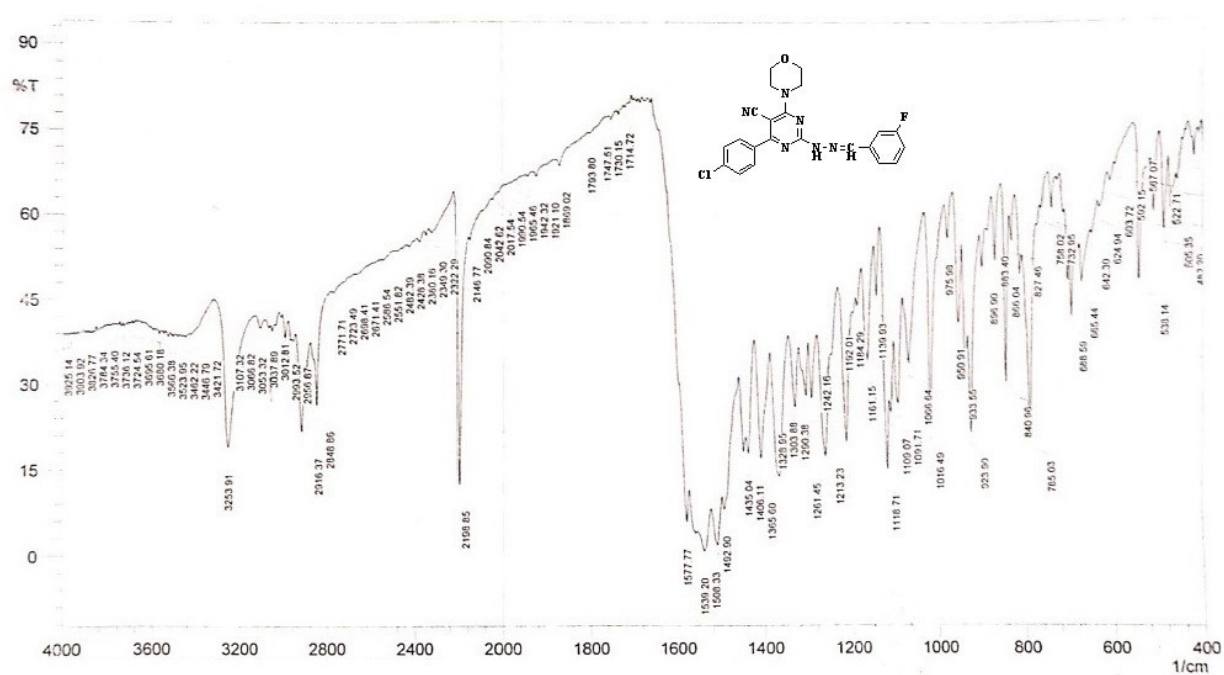

# <sup>1</sup>H NMR spectrum of compound 12a

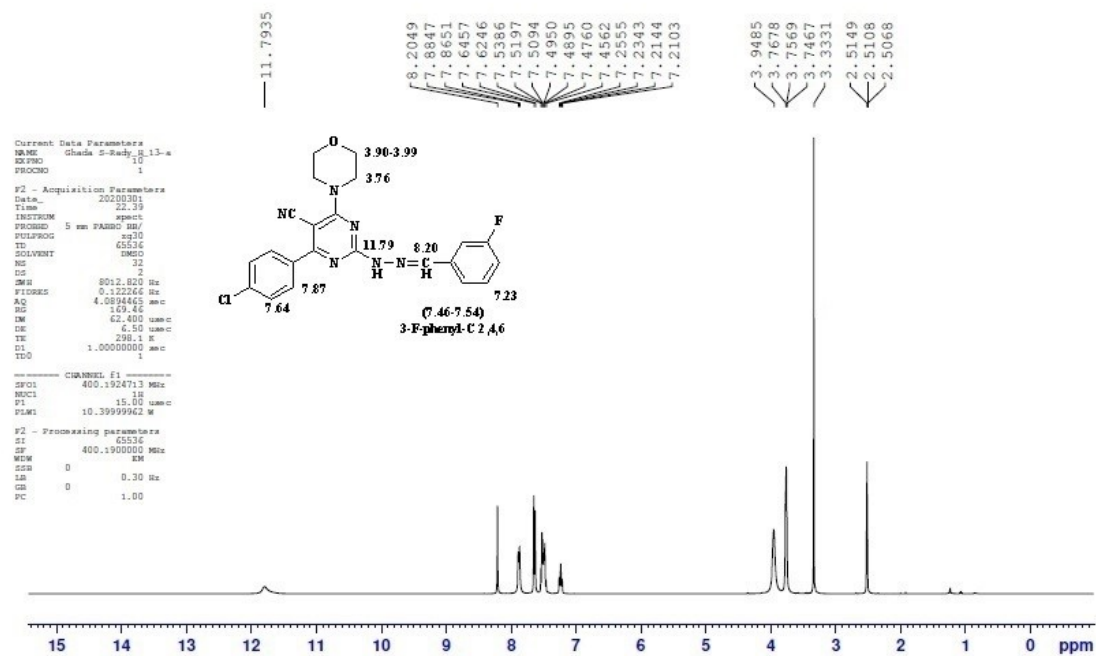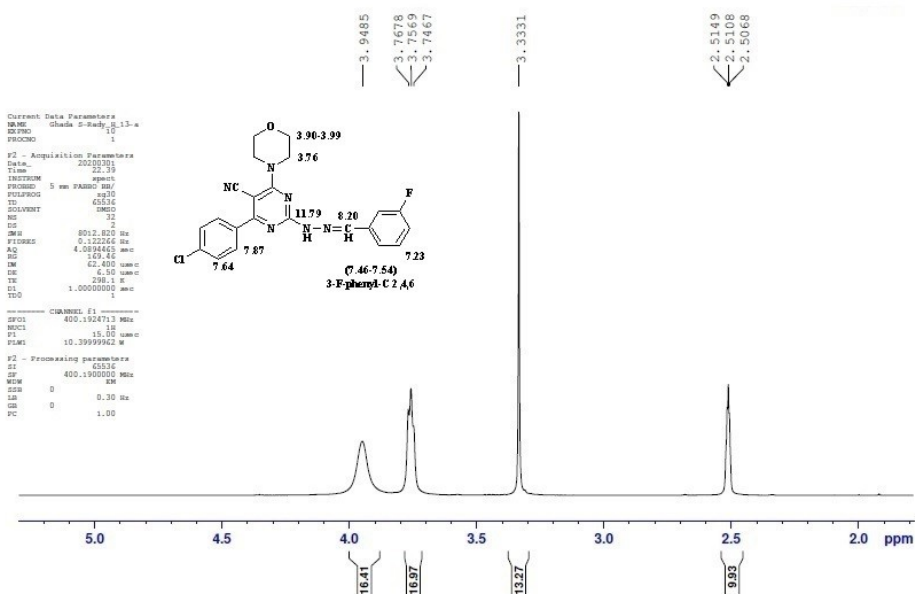

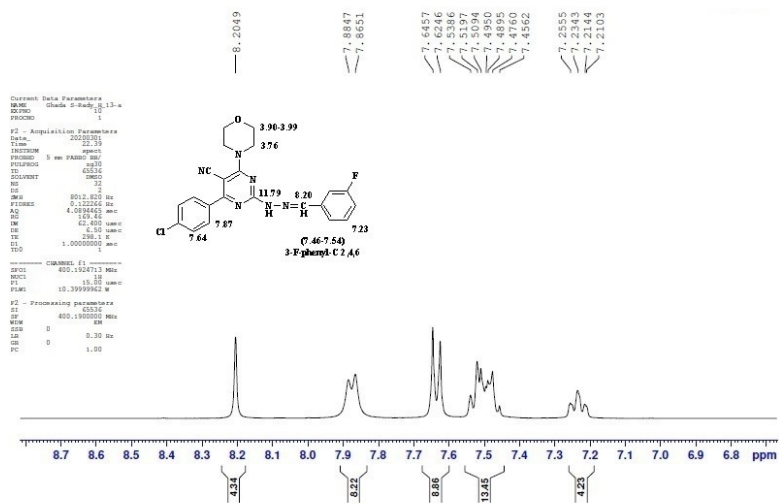

D2O

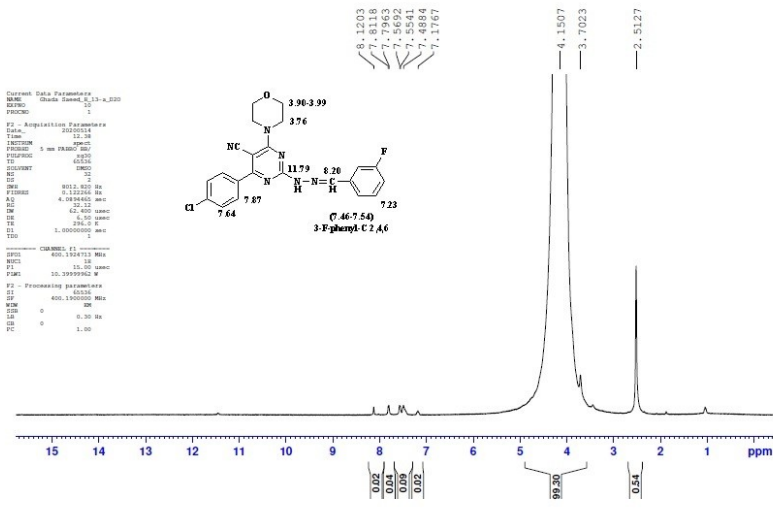

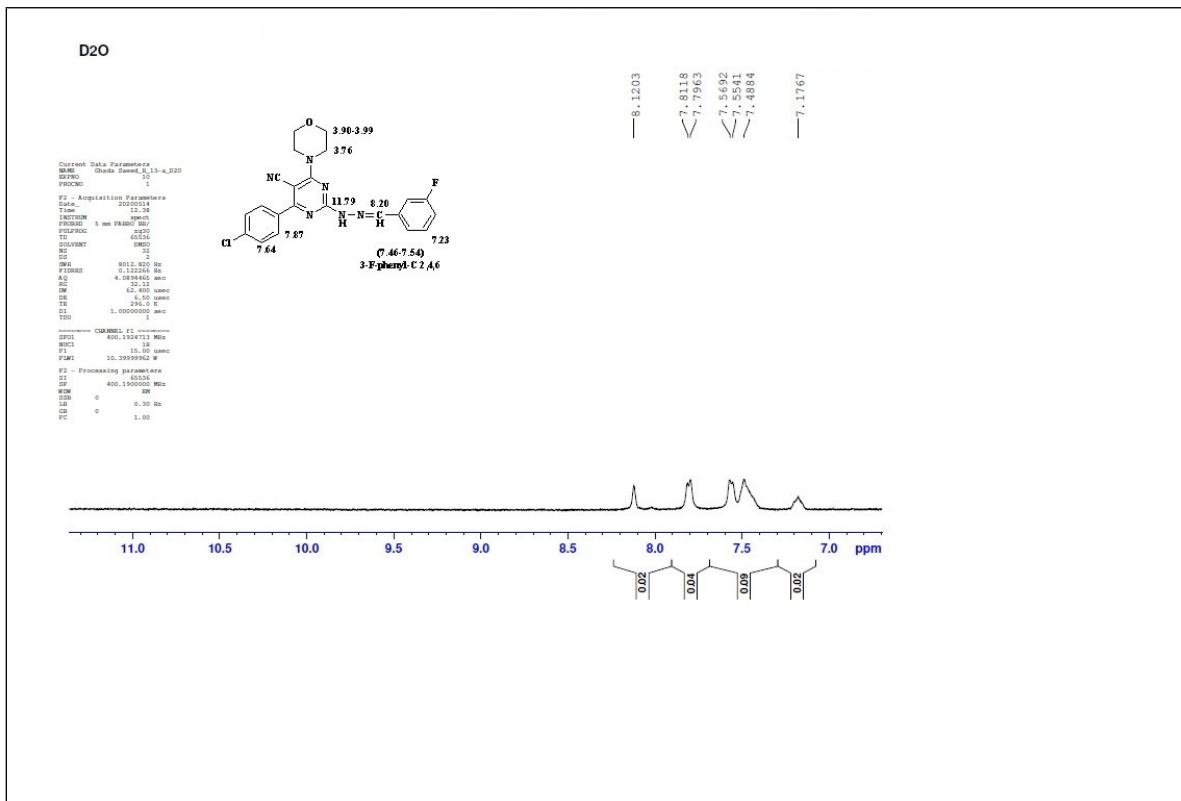

### The <sup>13</sup>C NMR spectrum of compound 12a

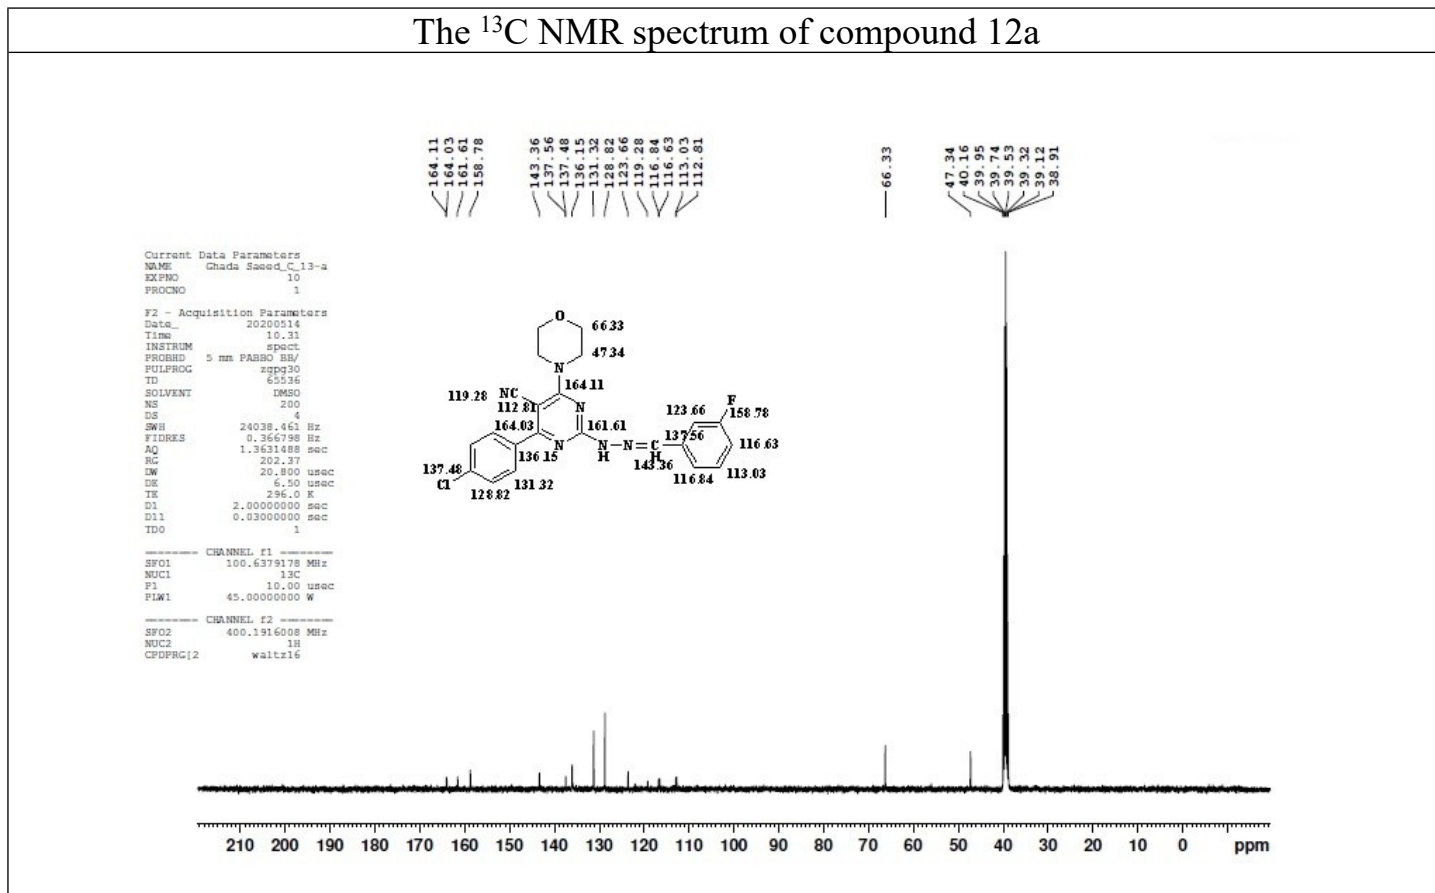

Current Data Parameters  
 NAME Gmads Saead\_C13-a  
 EXPNO 10  
 PROCNO 1

F2 - Acquisition Parameters  
 Date\_ 20200514  
 Time 10.31  
 INSTRUM spect  
 PROBRD 5 mm PABBO BBI/  
 PULPROG zgpg30  
 TD 65536  
 SOLVENT DMSO  
 NS 200  
 DS 4  
 SWH 24038.461 Hz  
 FIDRES 0.366798 Hz  
 AQ 1.3631488 sec  
 RG 202.37  
 LW 20.800 usec  
 DE 6.50 usec  
 TE 296.0 K  
 D1 2.00000000 sec  
 D11 0.03000000 sec  
 TD0 1

----- CHANNEL f1 -----  
 SF01 100.6379178 MHz  
 NUC1 13C  
 P1 10.00 usec  
 PLW1 45.00000000 W

----- CHANNEL f2 -----  
 SF02 400.1916008 MHz  
 NUC2 1H  
 CPDPRG2 waltz16

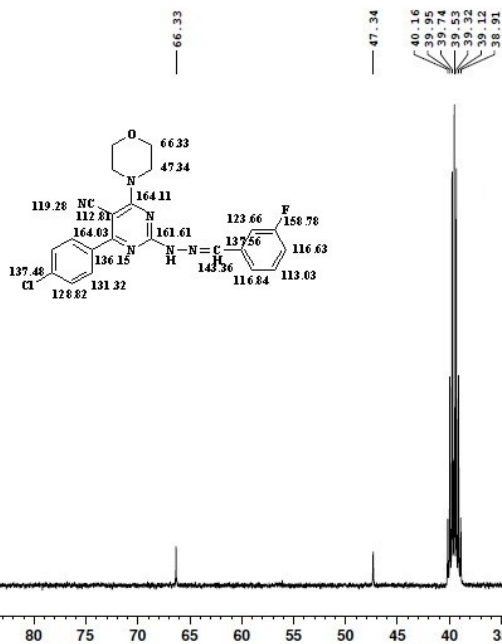

Current Data Parameters  
 NAME Gmads Saead\_C13-a  
 EXPNO 10  
 PROCNO 1

F2 - Acquisition Parameters  
 Date\_ 20200514  
 Time 10.31  
 INSTRUM spect  
 PROBRD 5 mm PABBO BBI/  
 PULPROG zgpg30  
 TD 65536  
 SOLVENT DMSO  
 NS 200  
 DS 4  
 SWH 24038.461 Hz  
 FIDRES 0.366798 Hz  
 AQ 1.3631488 sec  
 RG 202.37  
 LW 20.800 usec  
 DE 6.50 usec  
 TE 296.0 K  
 D1 2.00000000 sec  
 D11 0.03000000 sec  
 TD0 1

----- CHANNEL f1 -----  
 SF01 100.6379178 MHz  
 NUC1 13C  
 P1 10.00 usec  
 PLW1 45.00000000 W

----- CHANNEL f2 -----  
 SF02 400.1916008 MHz  
 NUC2 1H  
 CPDPRG2 waltz16

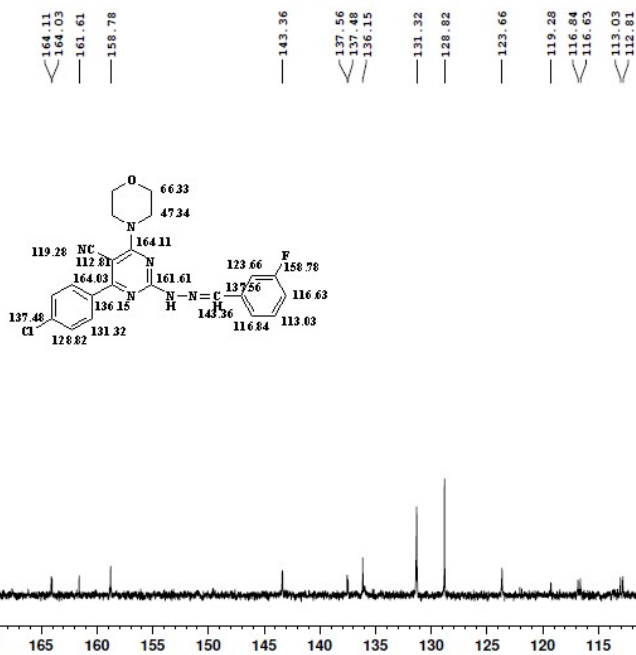

# The mass spectrum of compound 12a

RT: 2.55 - 3.49 SM: 15G

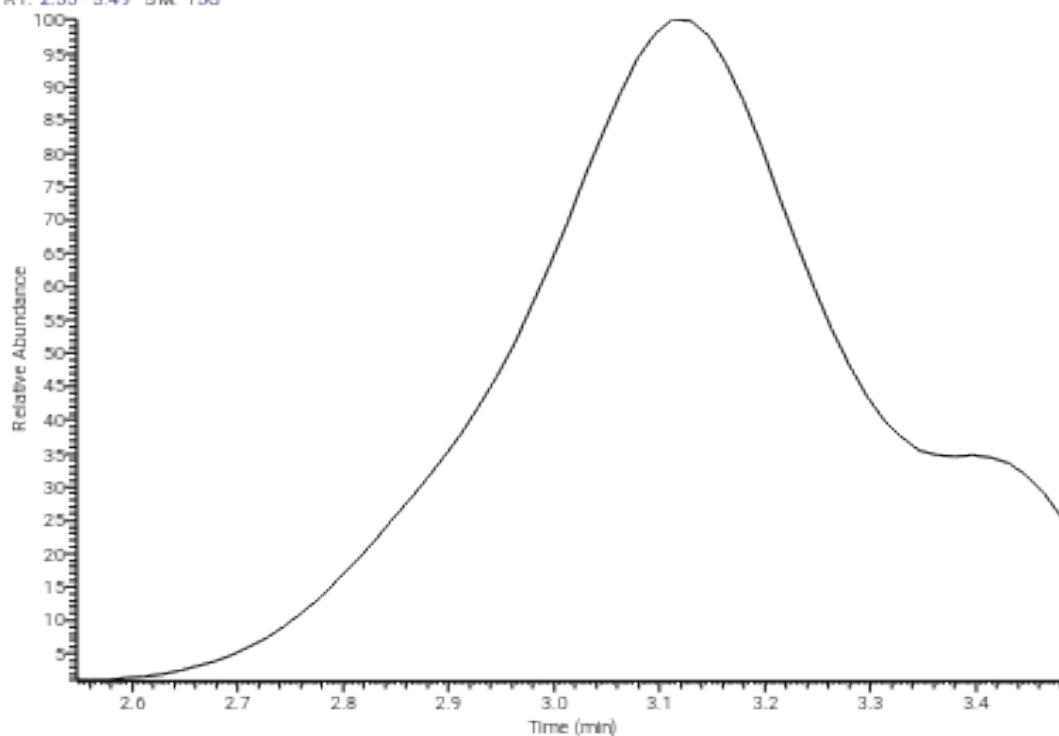

moshera-13a #225 RT: 3.78 AV: 1 SB: 2 4.35, 4.35 NL: 2.76E3  
T: {0,0} + cEI Full ms [40.00-1000.00]

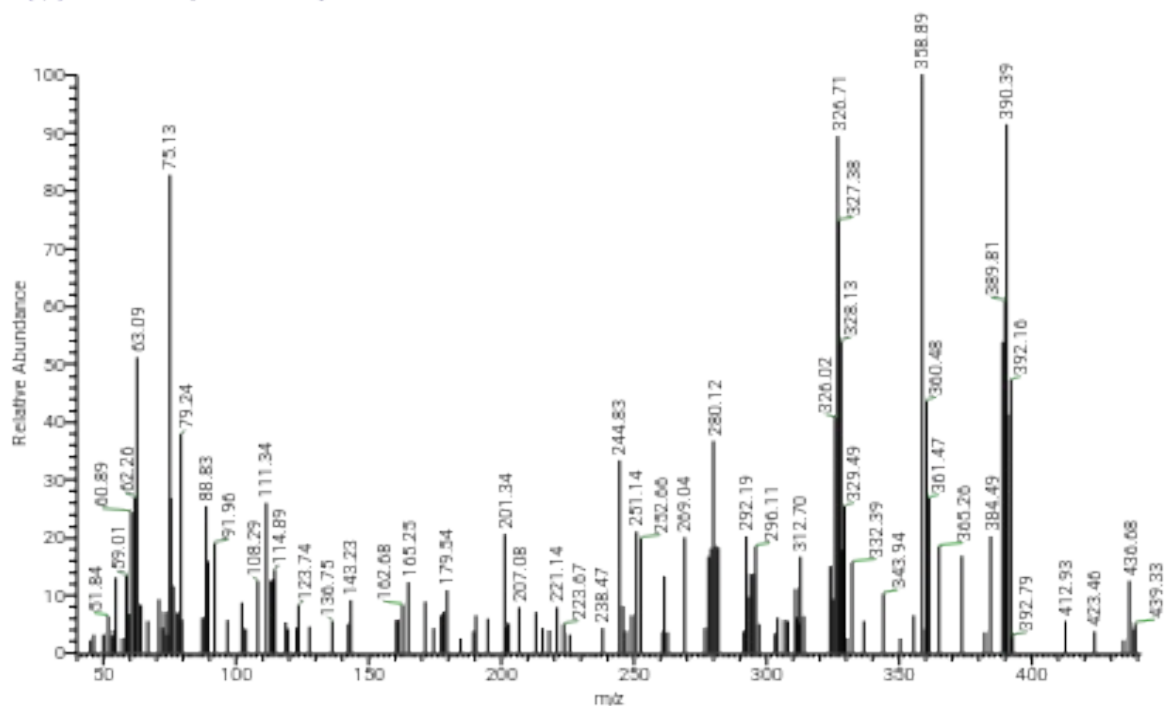



# The <sup>1</sup>H NMR spectrum of compound 12b

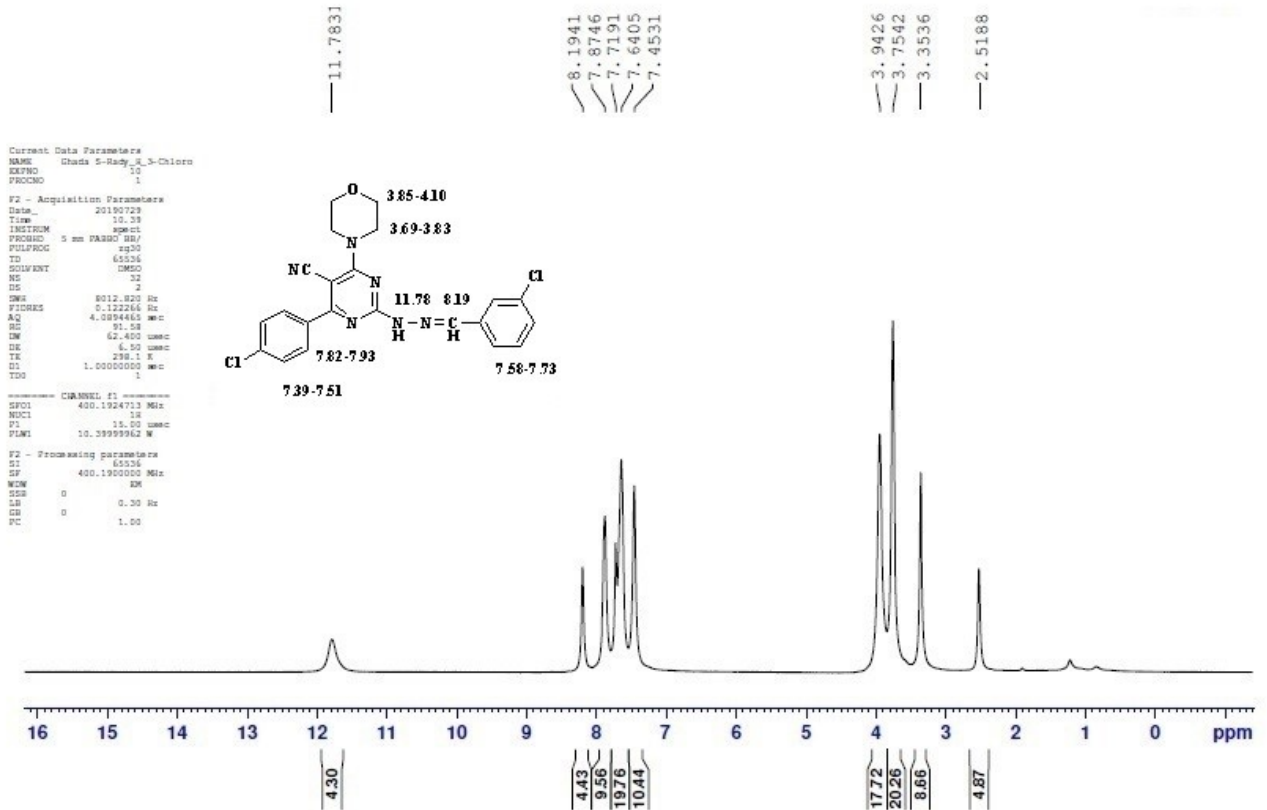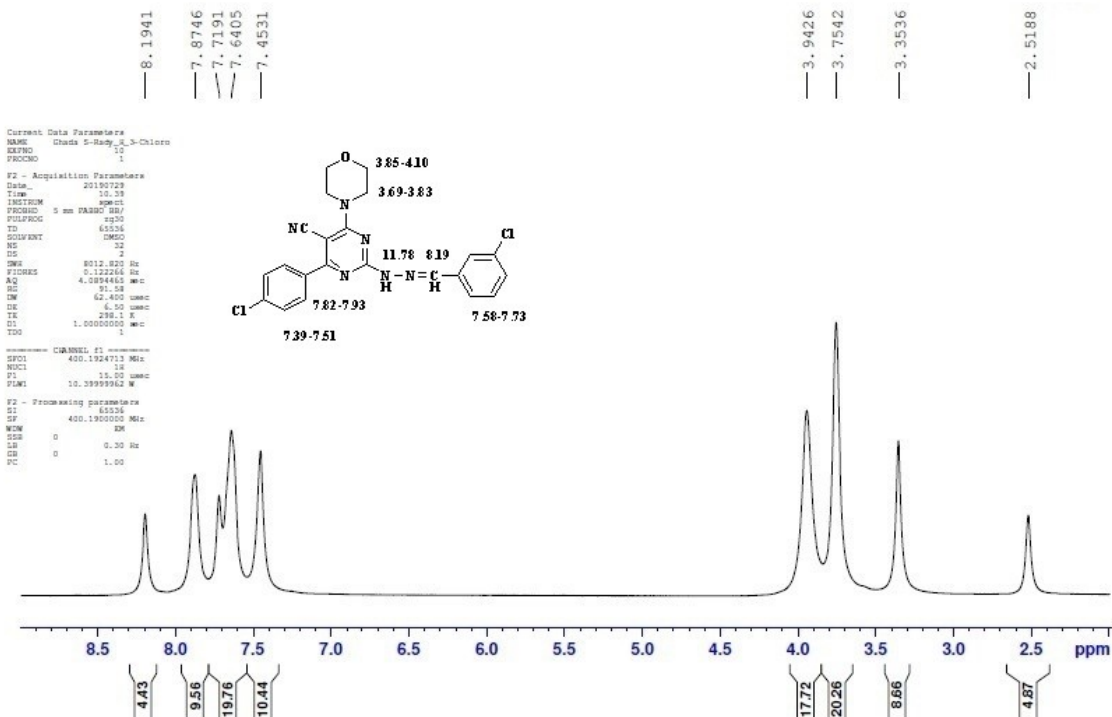





# The <sup>13</sup>C NMR spectrum of compound 12b

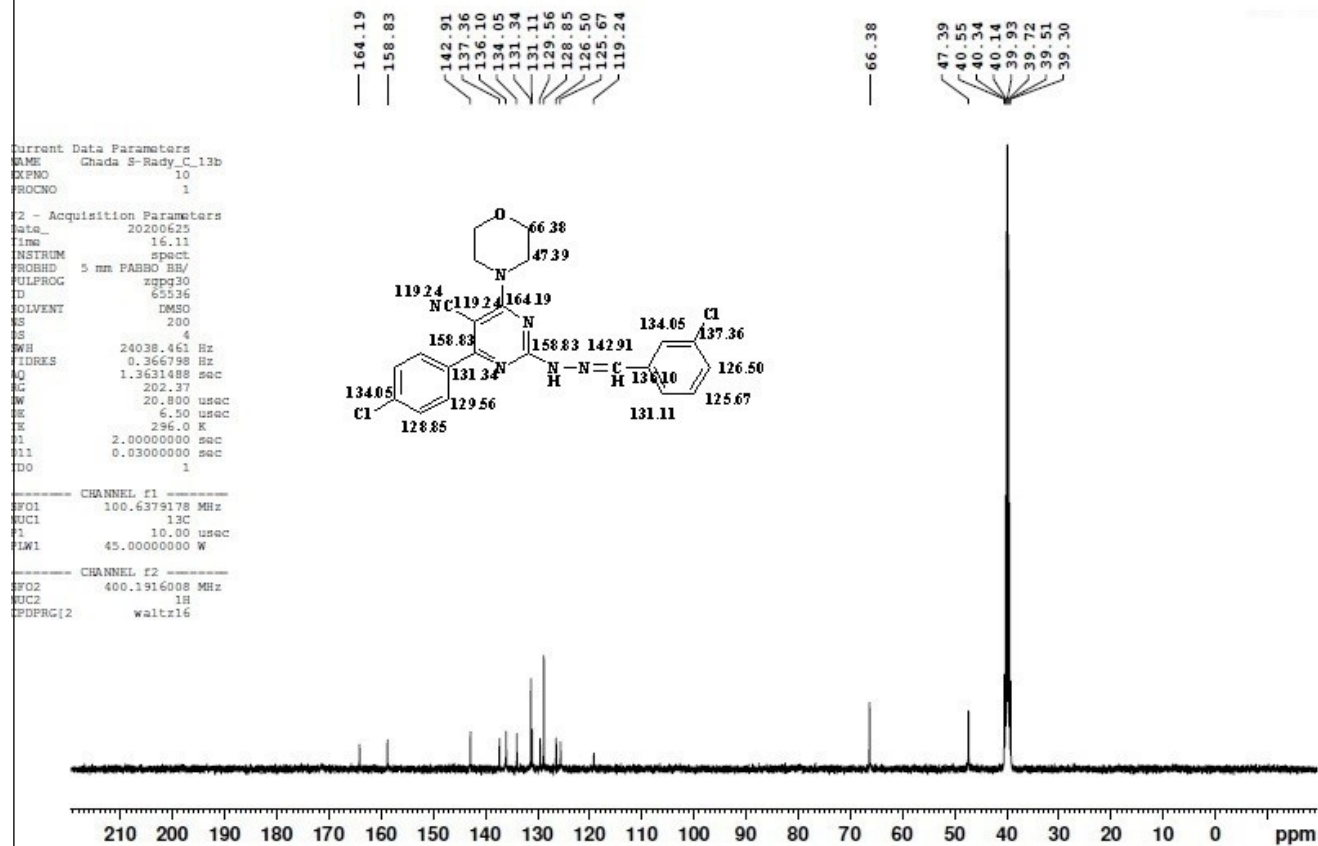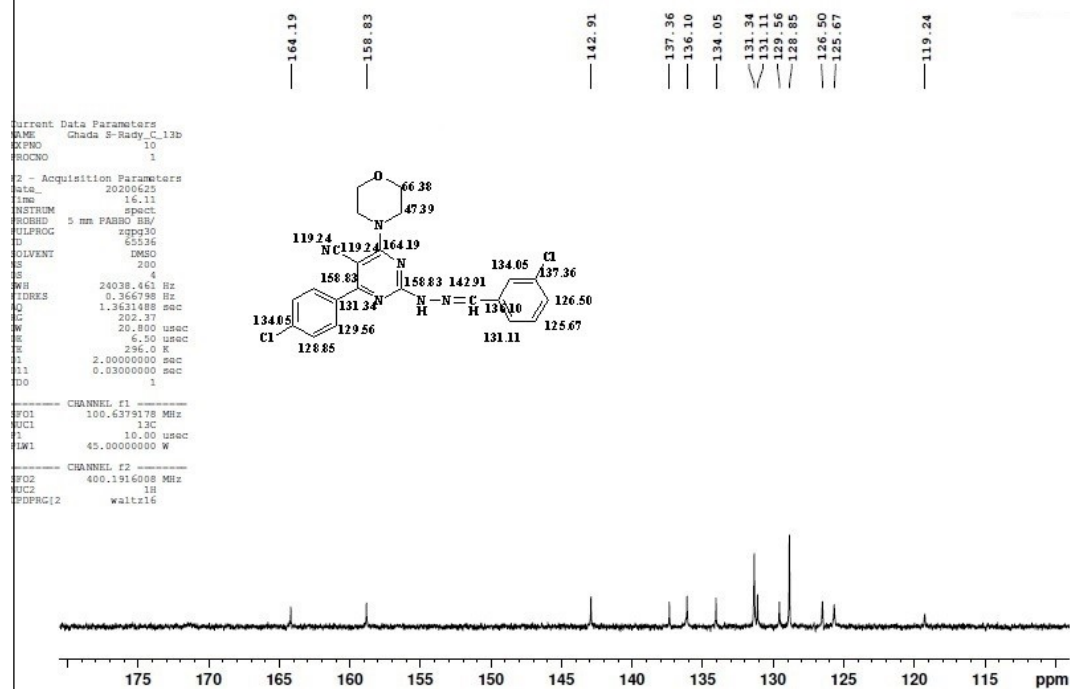

# The mass spectrum of compound 12b

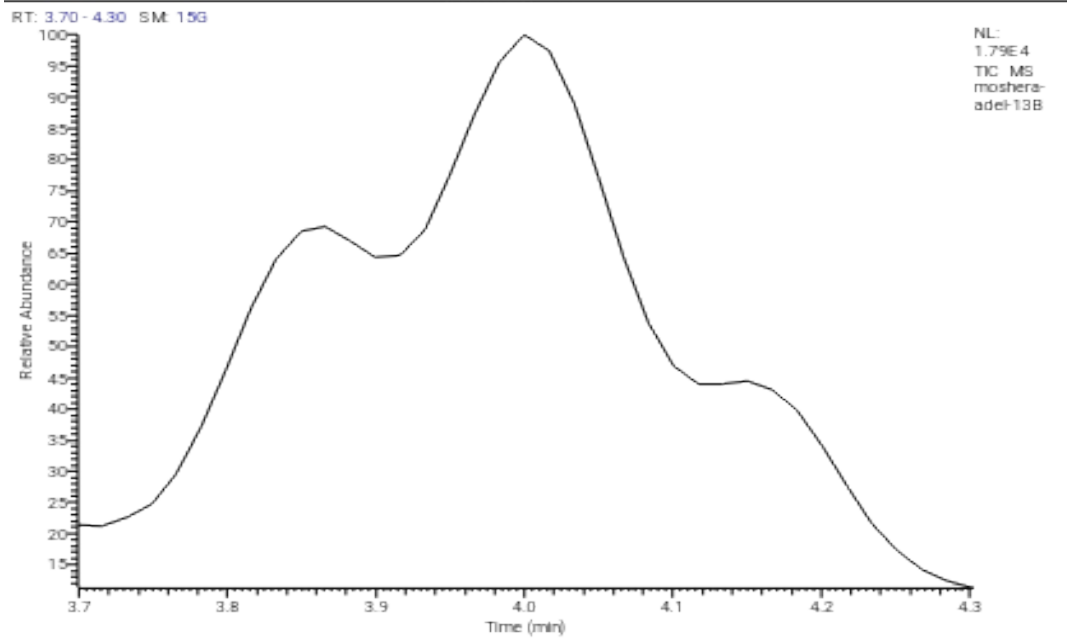

moshera-adel-13B #160 RT: 2.69 AV: 1 SB: 2 4.45, 4.45 NL: 5.09E2  
T: {0,0} + c EI Full ms [40.00-1000.00]

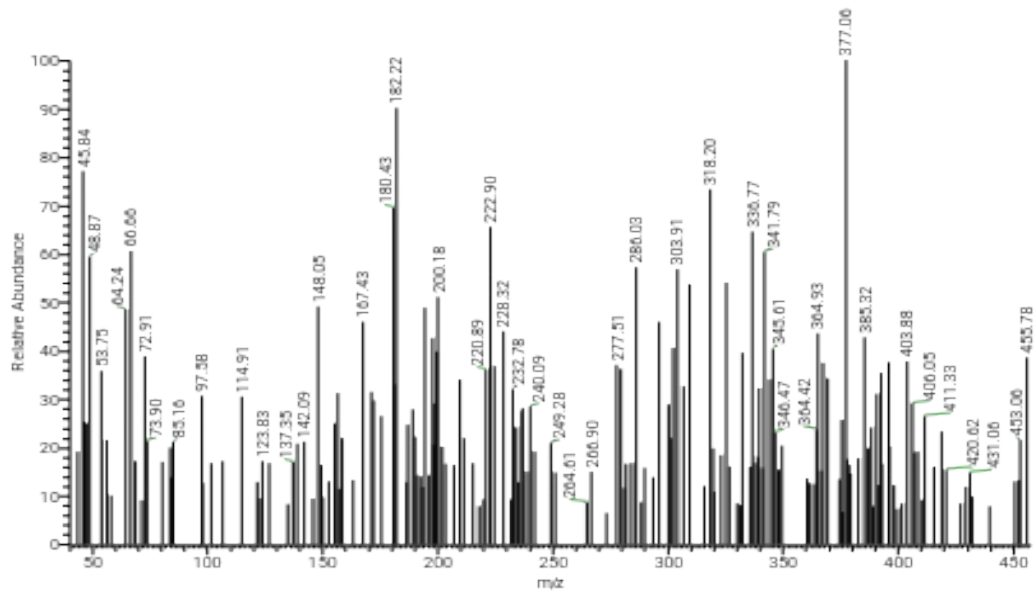

# Spectral data of compound 12c

The IR spectrum of compound 12c

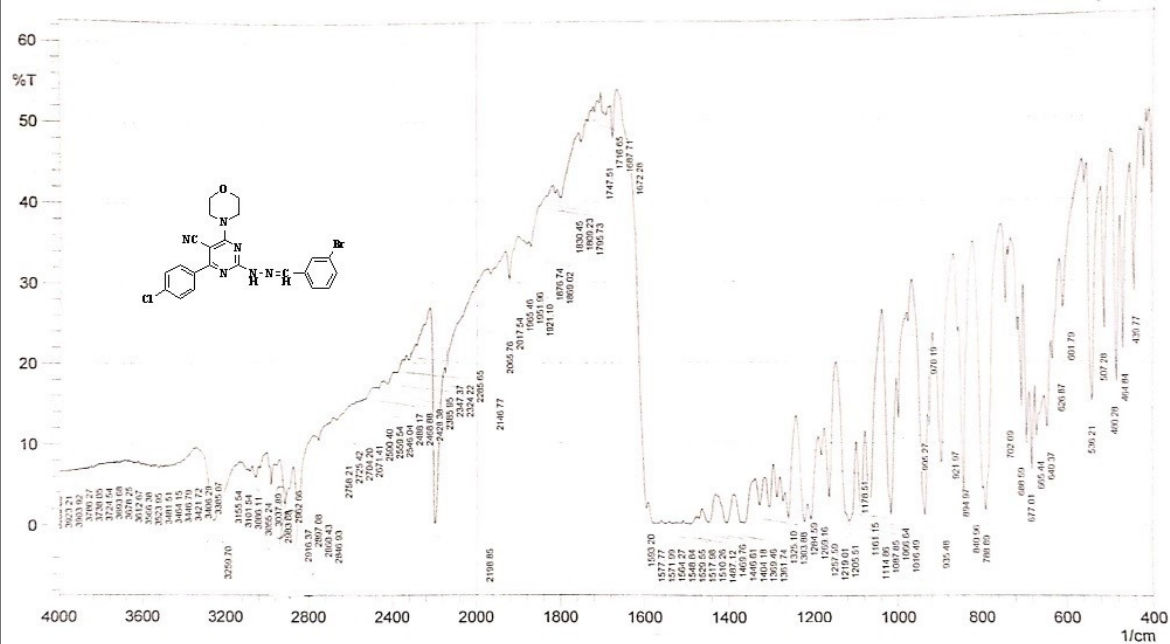

# The <sup>1</sup>H NMR spectrum of compound 12c

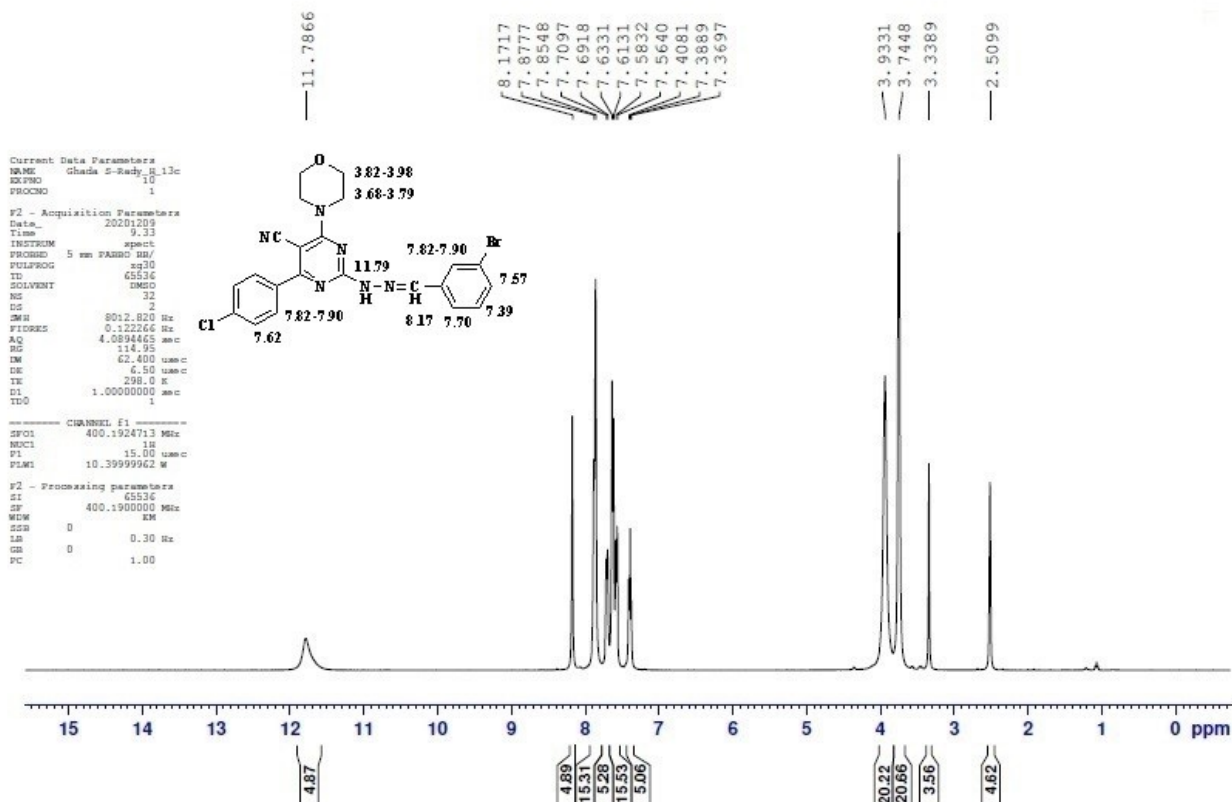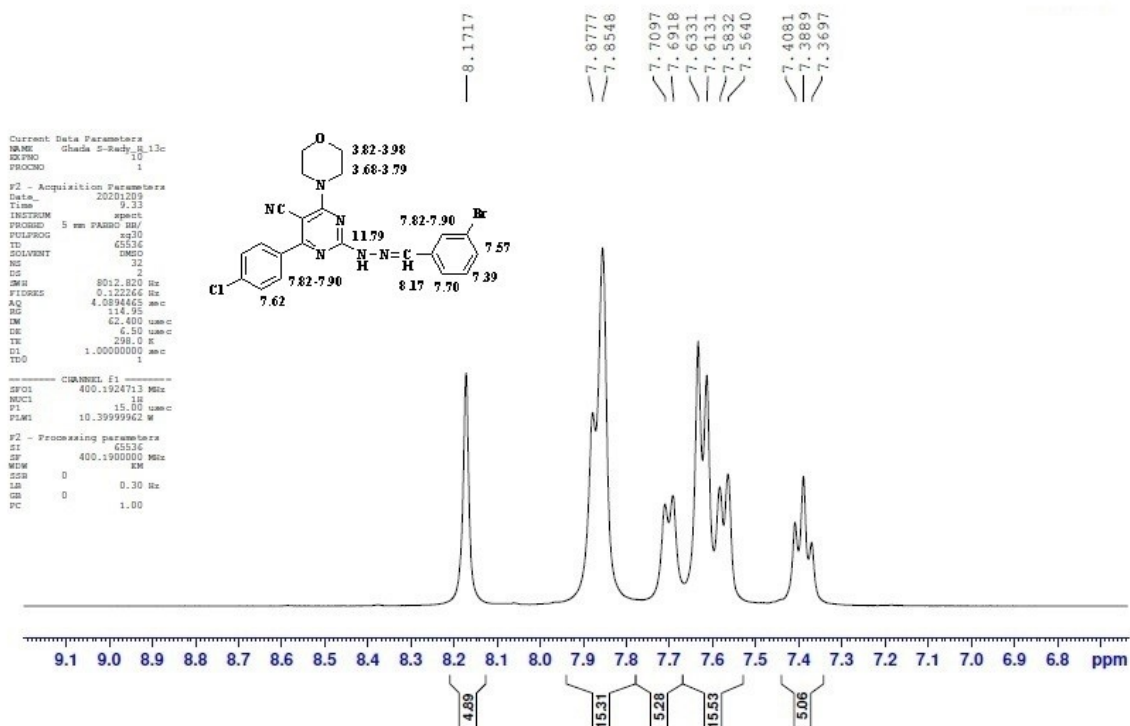

D2O

Current Data Parameters  
NAME Qhadi 5-Rady\_8\_13c\_D2O  
EXPNO 10  
PROCNO 1

F2 - Acquisition Parameters  
Date\_ 20201209  
Time 13.00  
INSTRUM spect  
PROBHD 5 mm PABBO BH/1  
PULPROG zg30  
TD 65536  
SOLVENT DMSO  
NS 2  
DS 2  
SWH 8012.820 Hz  
FIDRES 0.122266 Hz  
AQ 4.0894665 sec  
RG 129.43  
DM 62.400 usec  
DE 4.50 usec  
TE 298.0 K  
D1 1.0000000 sec  
TD0 1

===== CHANNEL f1 =====  
SFO1 400.1924713 MHz  
NUC1 13  
P1 15.00 usec  
P1M1 10.3999962 W

F2 - Processing parameters  
SI 65536  
SF 400.1900000 MHz  
WDW EM  
SSB 0  
LB 0.30 Hz  
GB 0  
PC 1.00

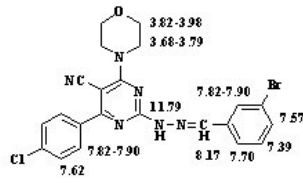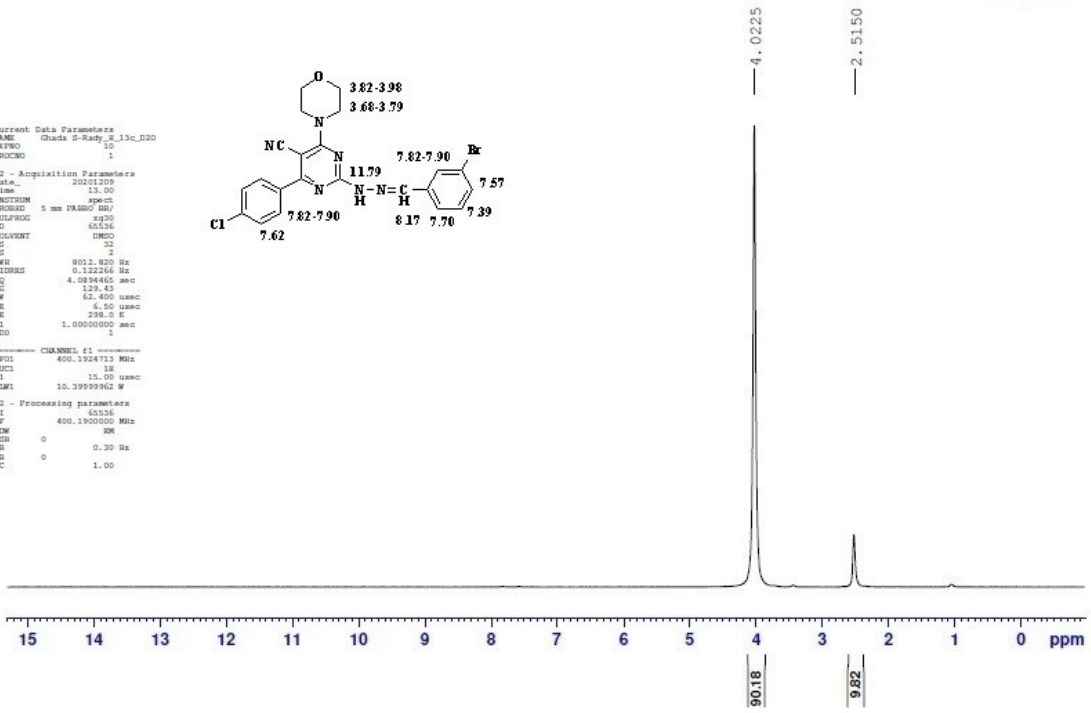

# The <sup>13</sup>C NMR spectrum of compound 12c

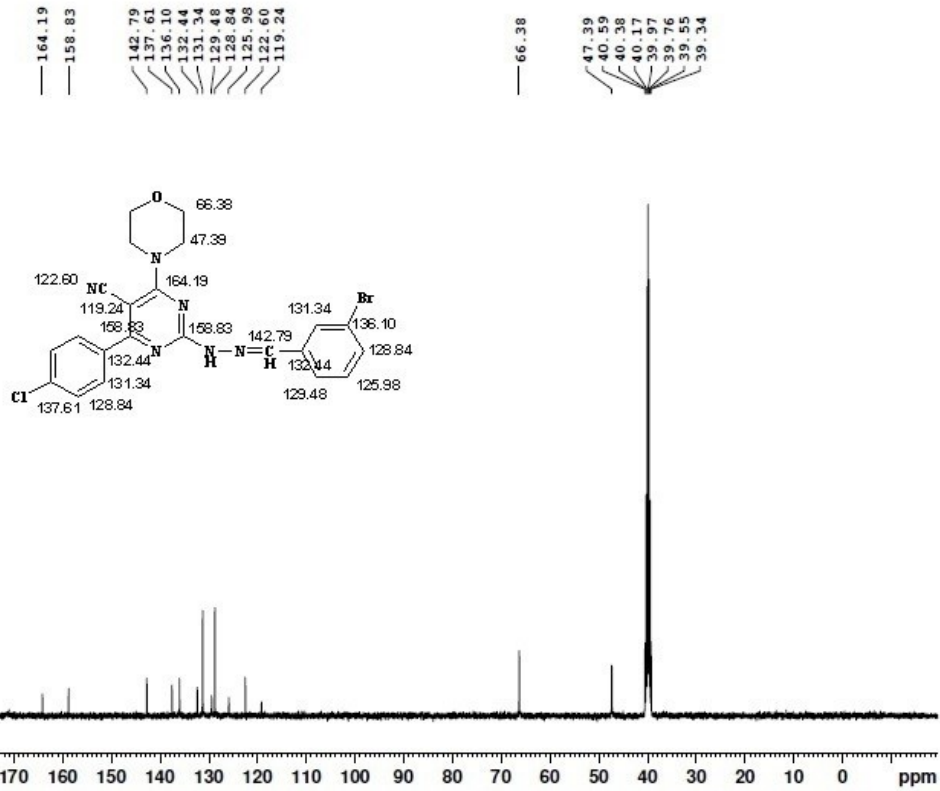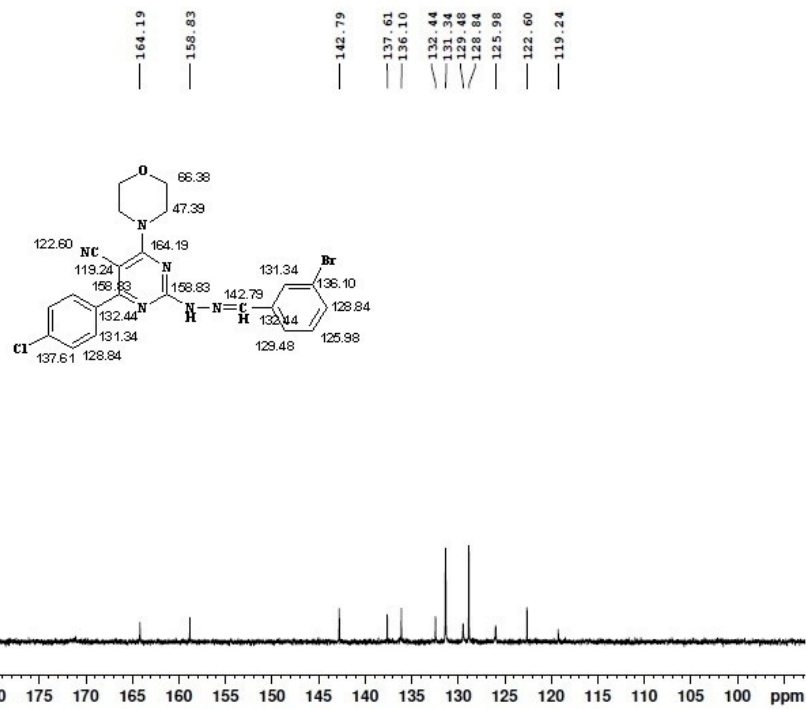

# The mass spectrum of compound 12c

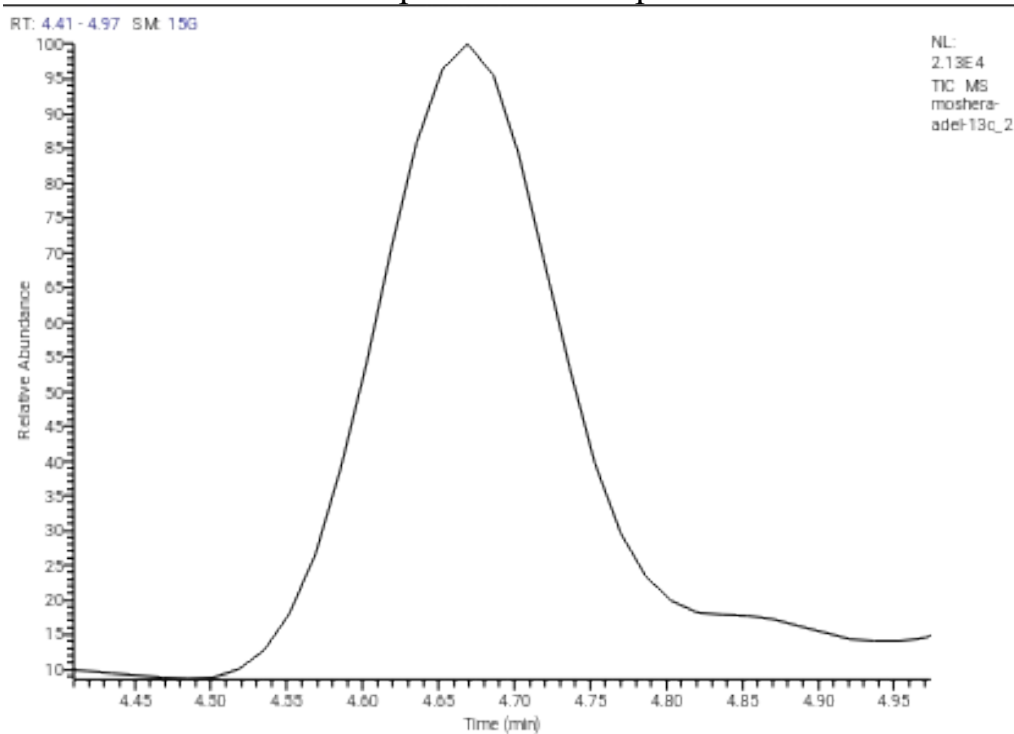

moshera-adel-13c\_2 #204 RT: 3.43, AV: 1 SB: 2 4.45, 4.45 NL: 4.33E2  
T: {0,0} + c EI Full ms [40.00-1000.00]

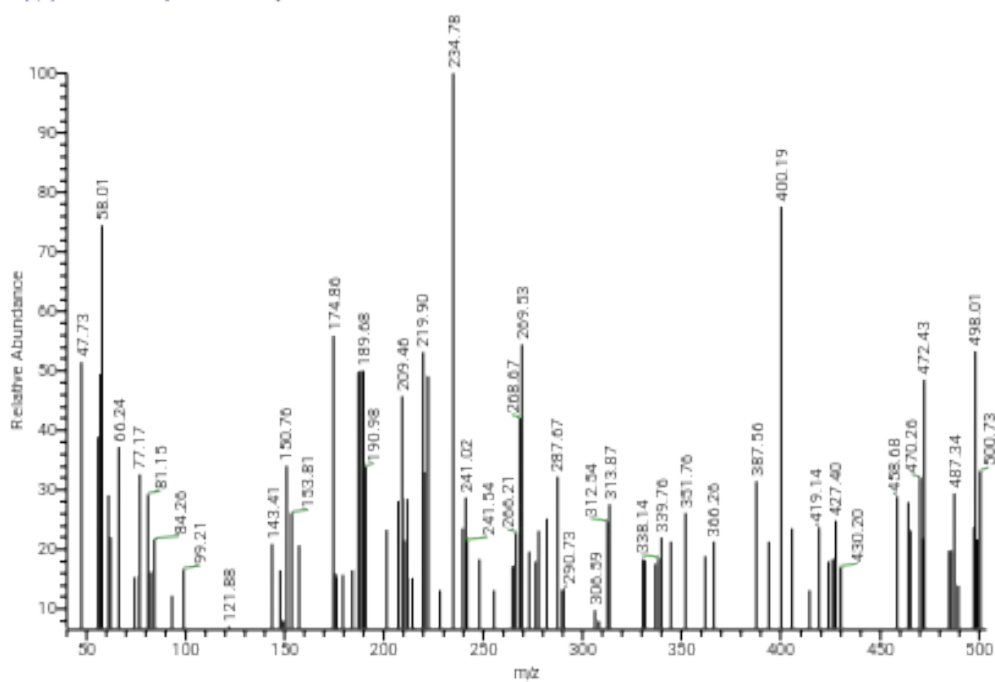



## Spectral data of compound 12d

The IR spectrum of compound 12d

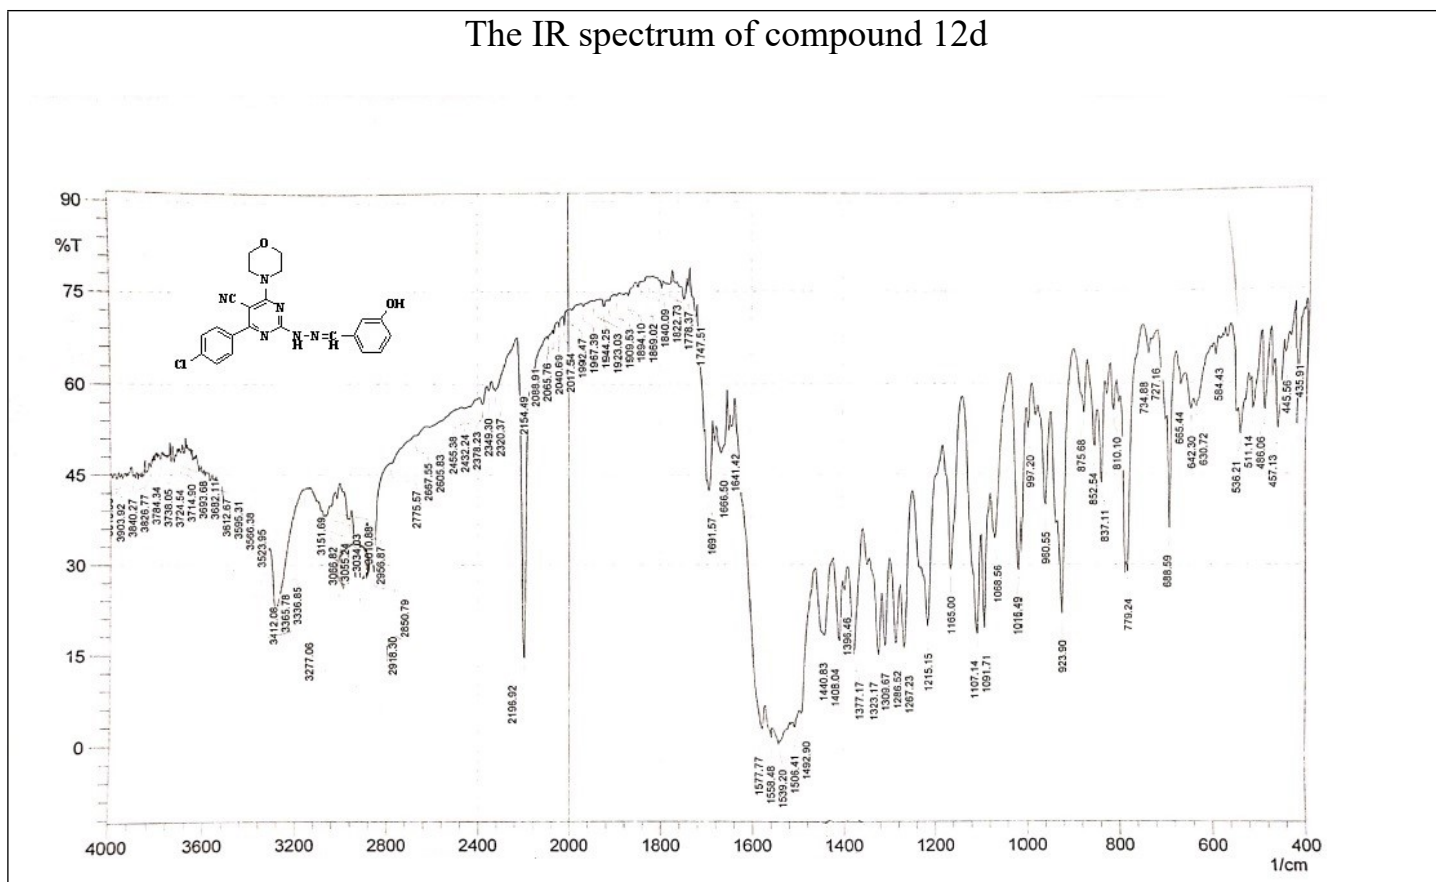

# The <sup>1</sup>H NMR spectrum of compound 12d

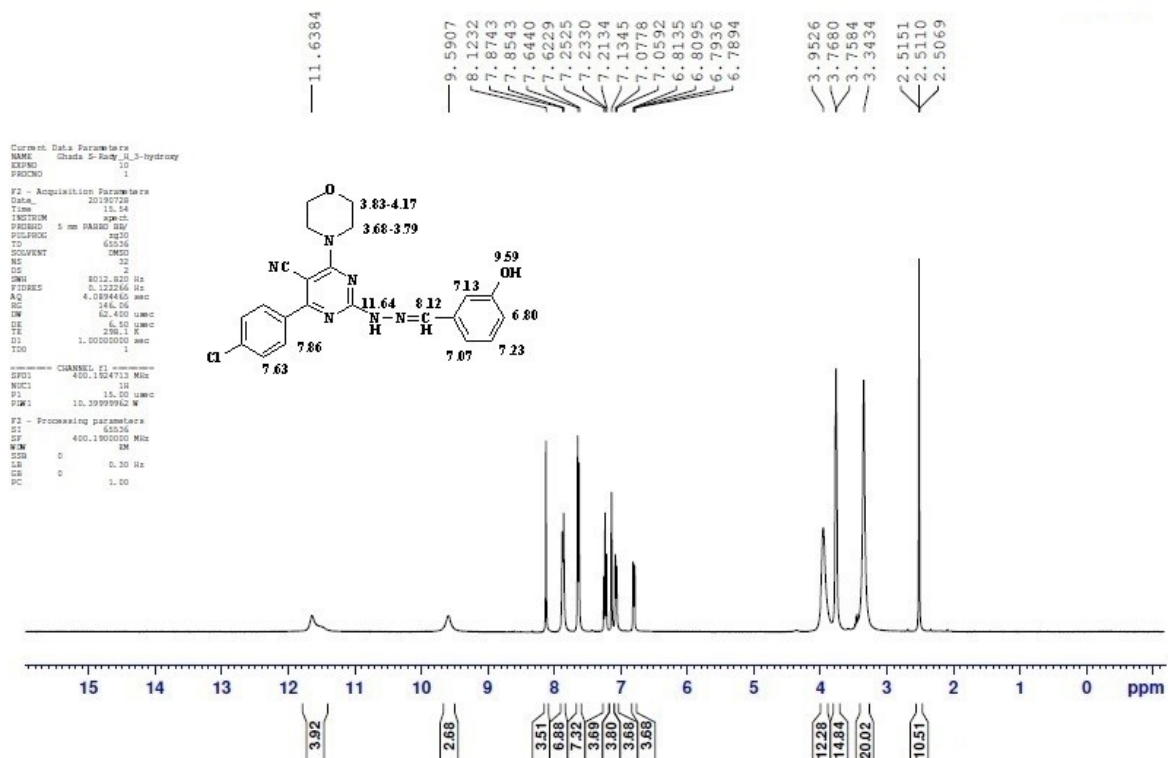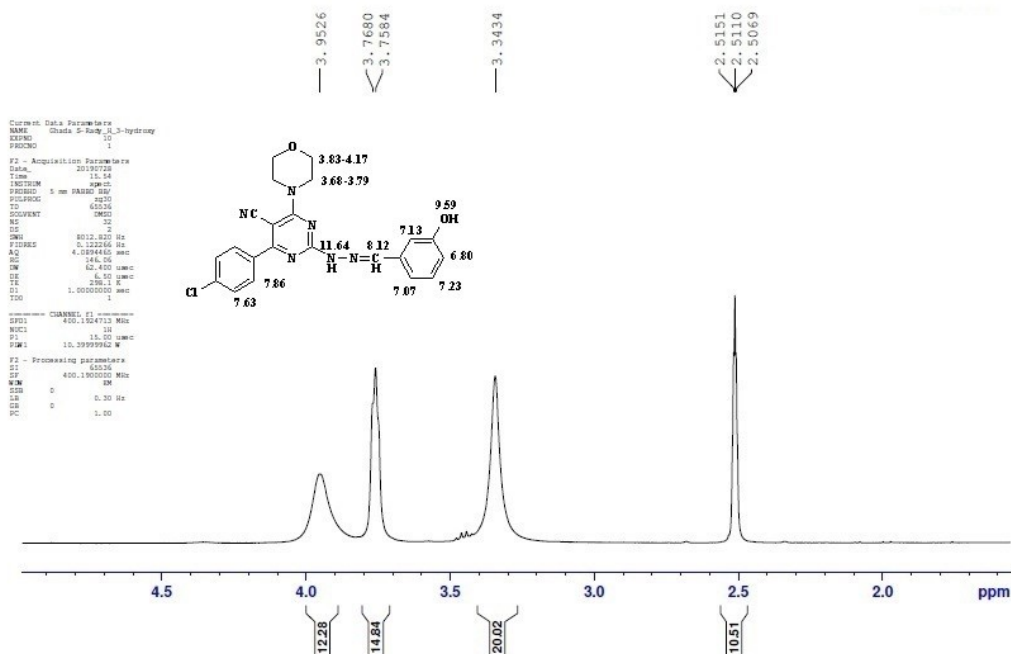

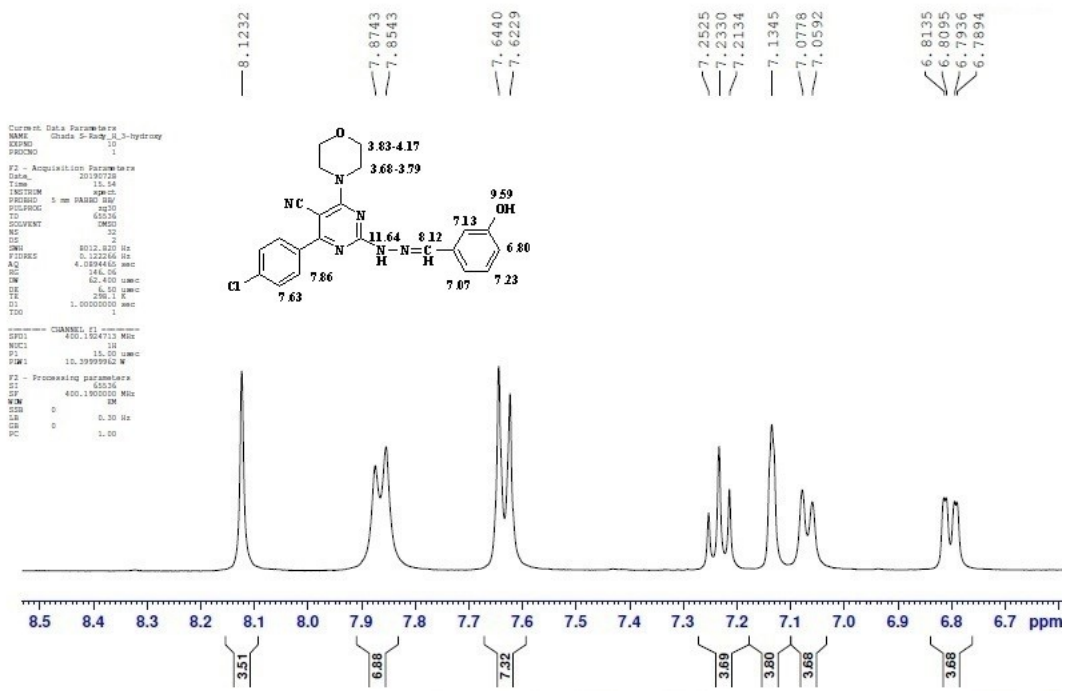

D2O

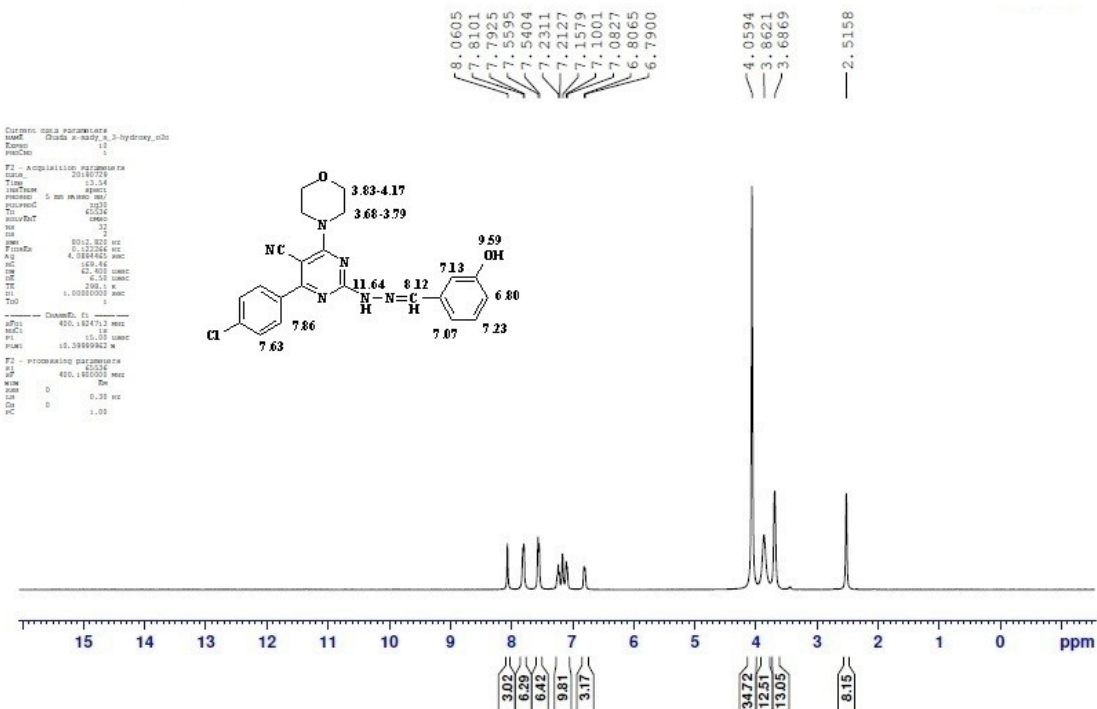

# The <sup>13</sup>C NMR spectrum of compound 12d

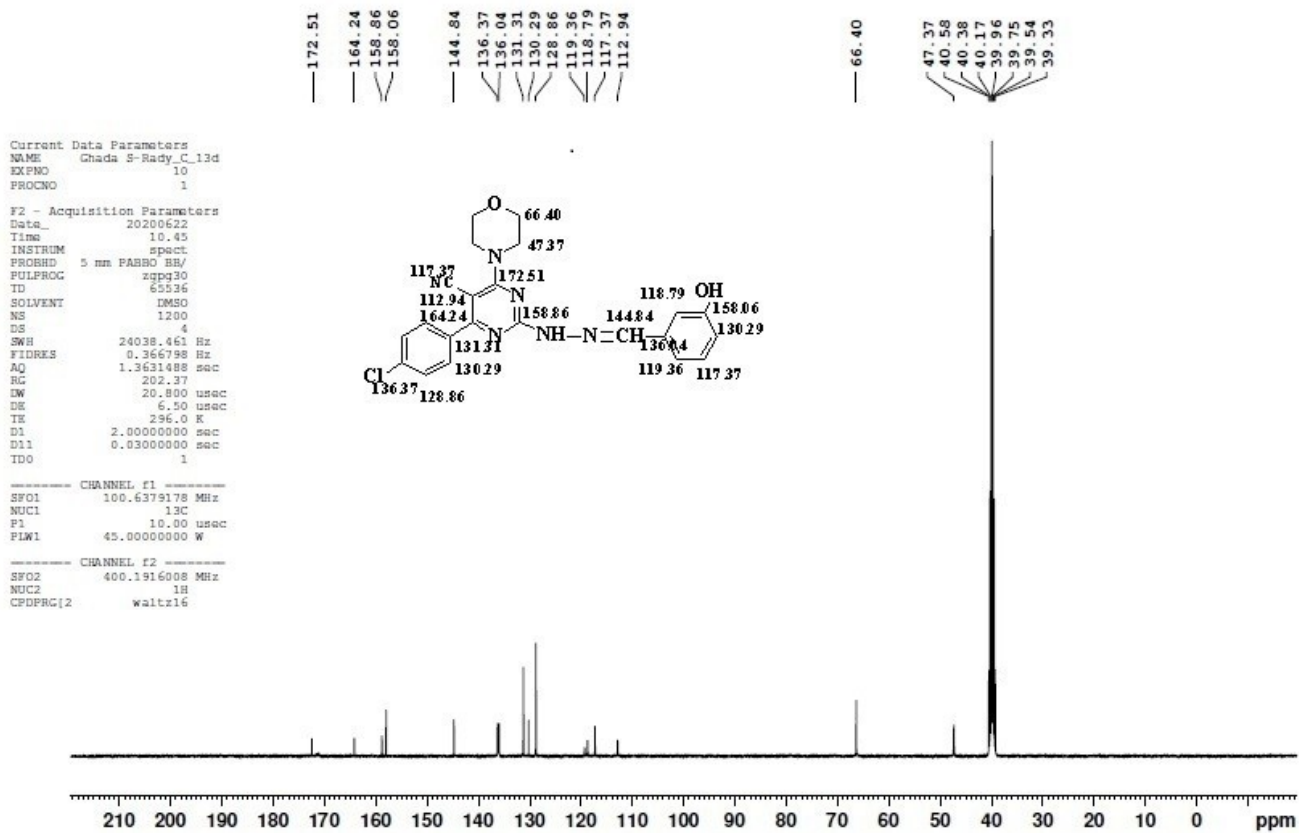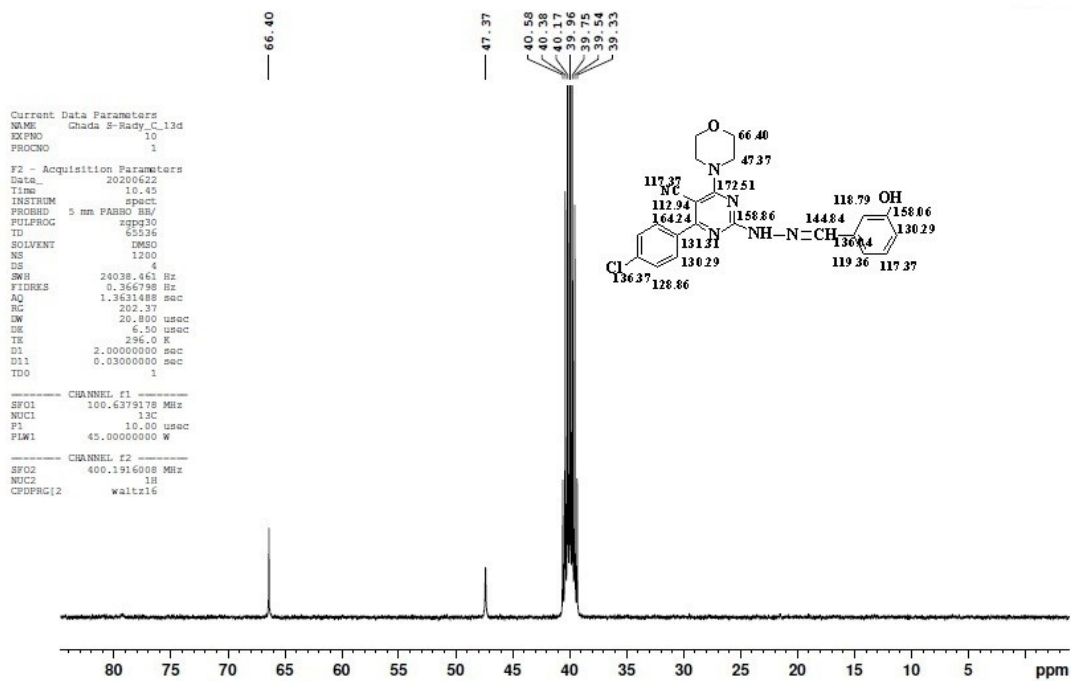

Current Data Parameters  
 NAME Chada S-Rady\_C\_13d  
 EXPNO 10  
 PROCNO 1

F2 - Acquisition Parameters  
 Date\_ 20200622  
 Time 10.45  
 INSTRUM spect  
 PROBRD 5 mm PABBO BB/  
 PULPROG zgpg30  
 ID 55336  
 SOLVENT DMSO  
 NS 1200  
 DS 4  
 SWH 24038.461 Hz  
 FIDRES 0.366798 Hz  
 AQ 1.363188 sec  
 RG 202.37  
 DW 20.800 usec  
 DE 6.50 usec  
 TE 296.0 K  
 D1 2.00000000 sec  
 D11 0.03000000 sec  
 ID0 1

----- CHANNEL f1 -----  
 SFO1 100.6379178 MHz  
 NUC1 13C  
 P1 10.00 usec  
 PLW1 45.00000000 W

----- CHANNEL f2 -----  
 SFO2 400.1916008 MHz  
 NUC2 1H  
 CPDPRG2 waltz16

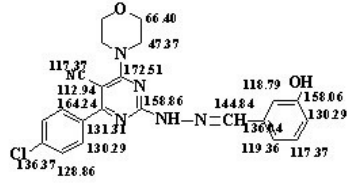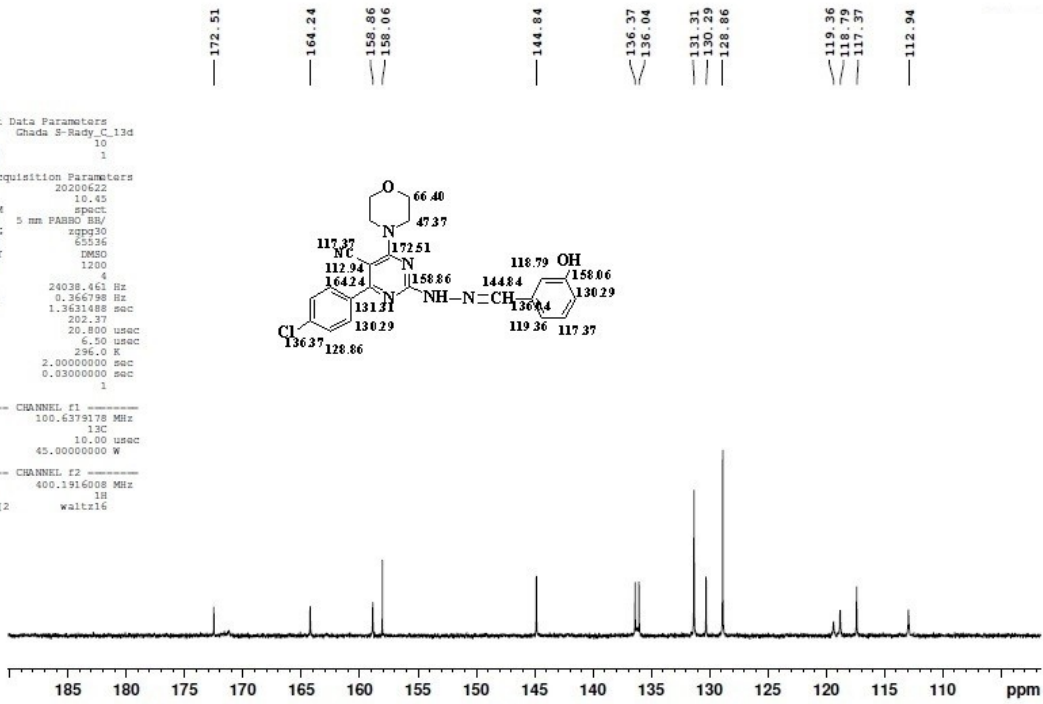

# The mass spectrum of compound 12d

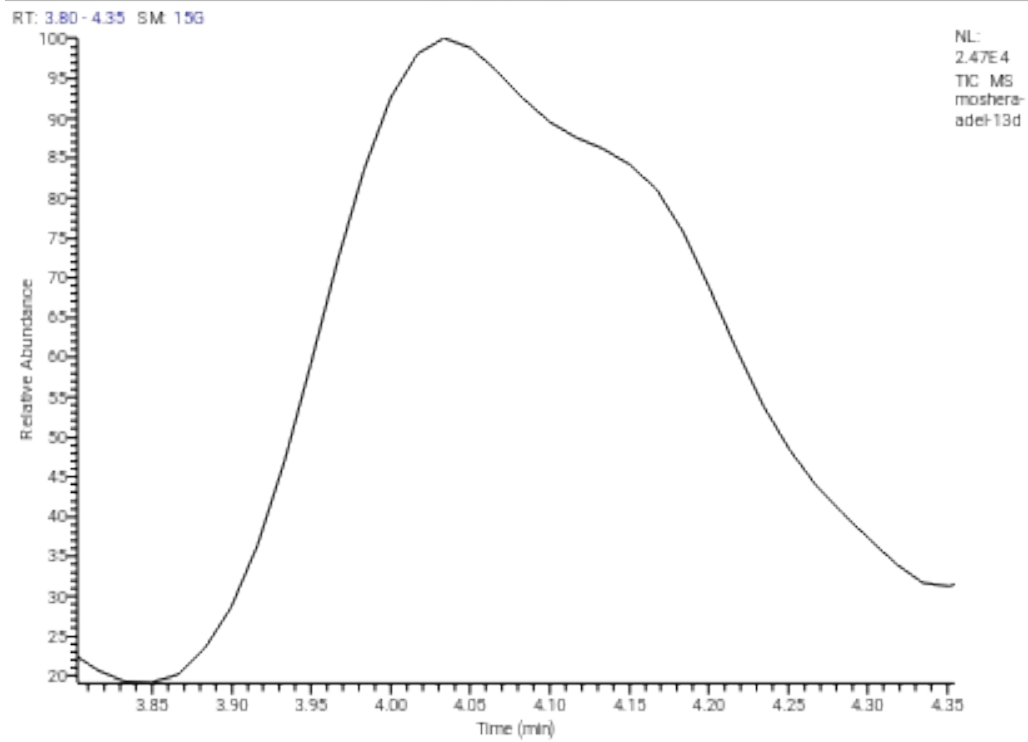

moshera-adel-13d #73 RT: 1.24 AV: 1 SB: 2 4.45, 4.45 NL: 2.81E2  
T: {0,0} + c EI Full ms [40.00-1000.00]

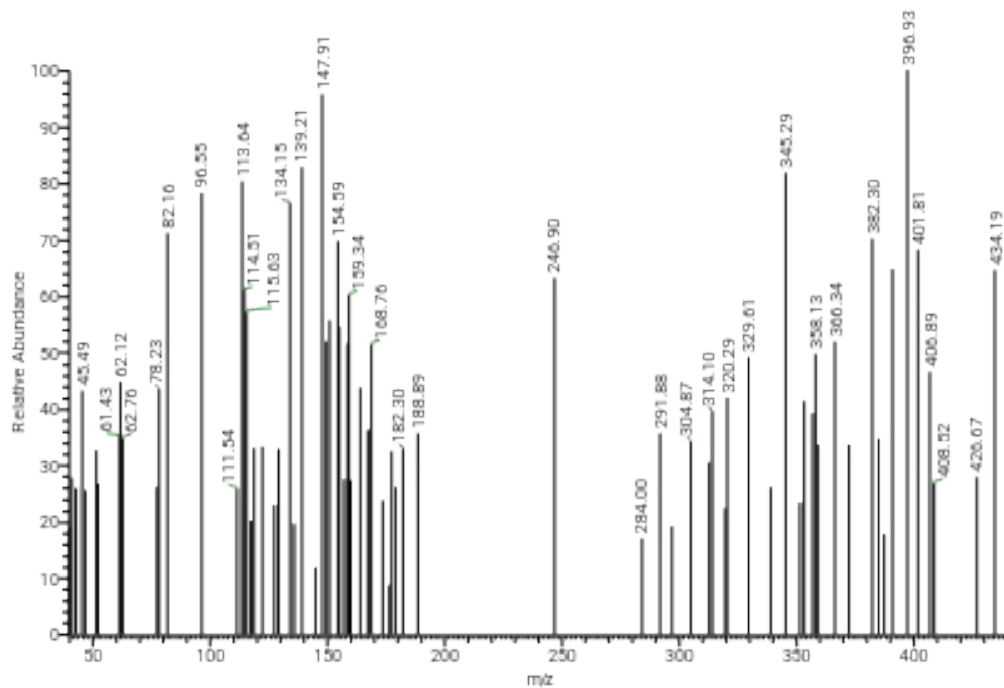

# Spectral data of compound 12 e

The IR spectrum of compound 12e

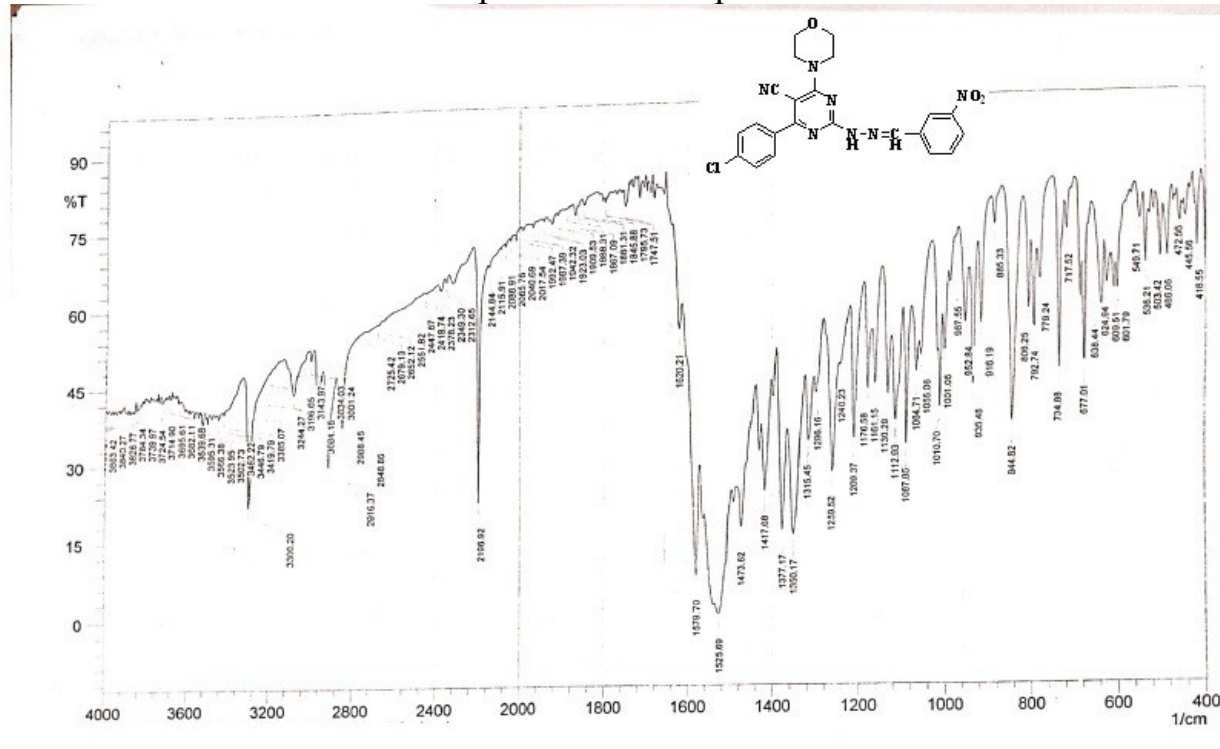

# The <sup>1</sup>H NMR spectrum of compound 12e

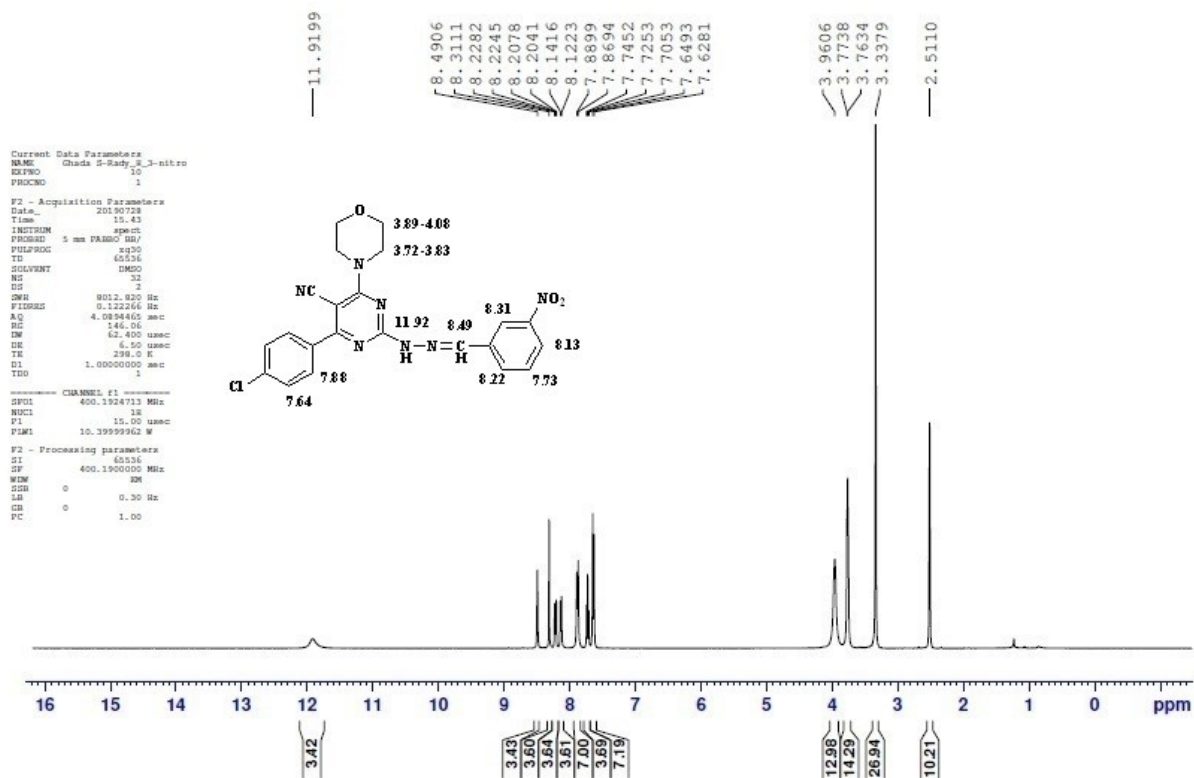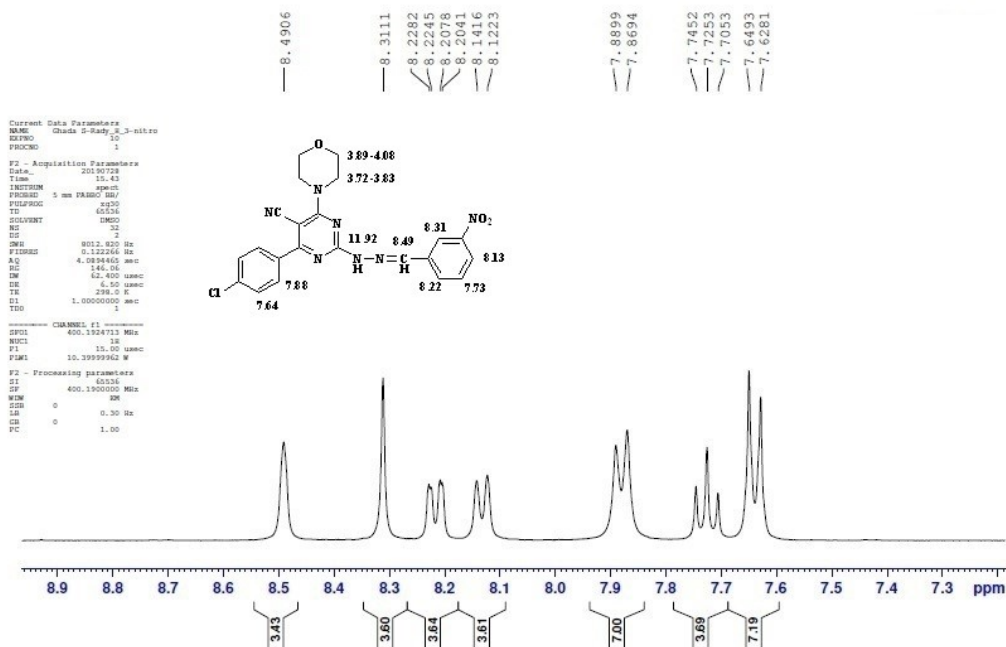



D2O

Current Data Parameters  
 NAME Choda 5-Rad\_8\_3-nitro\_D2O  
 EXPNO 10  
 PROCNO 1

F2 - Acquisition Parameters  
 Date\_ 20180729  
 Time 13.39  
 INSTRUM spect  
 PROBHD 5 mm PASSED 1H/1  
 PULPROG zgpg30  
 TO 455.34  
 SOLVENT DMSO  
 NS 12  
 DS 4  
 SFO1 801.820 Hz  
 FREQS 812.234 Hz  
 AC 4.008464 sec  
 SC 156.48  
 SW 62.400 usec  
 OR 6.50 usec  
 TE 299.2 K  
 D1 1.0000000 sec  
 DS 1

CHANNEL f1  
 SFO1 400.1924713 MHz  
 NUC1 13  
 P1 15.00 usec  
 PL1 10.39999942 W

F2 - Processing parameters  
 SI 455.34  
 SF 400.1920000 MHz  
 SW 0  
 SSB 0  
 GB 0  
 PC 1.00

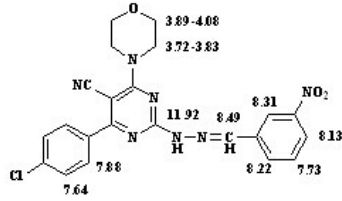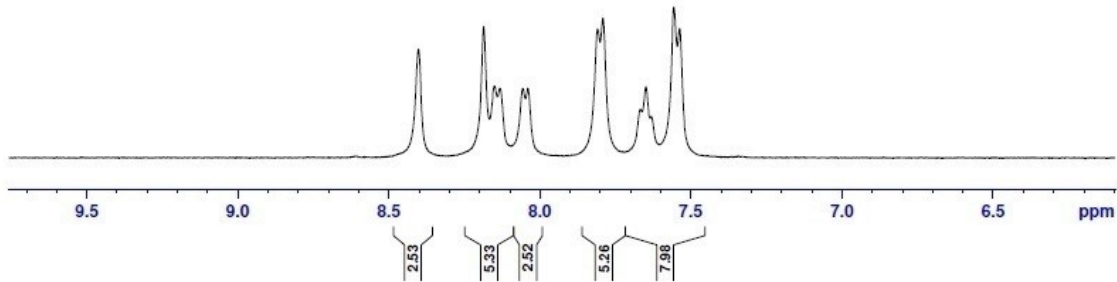

D2O

Current Data Parameters  
 NAME Choda 5-Rad\_8\_3-nitro\_D2O  
 EXPNO 10  
 PROCNO 1

F2 - Acquisition Parameters  
 Date\_ 20180729  
 Time 13.39  
 INSTRUM spect  
 PROBHD 5 mm PASSED 1H/1  
 PULPROG zgpg30  
 TO 455.34  
 SOLVENT DMSO  
 NS 12  
 DS 4  
 SFO1 801.820 Hz  
 FREQS 812.234 Hz  
 AC 4.008464 sec  
 SC 156.48  
 SW 62.400 usec  
 OR 6.50 usec  
 TE 299.2 K  
 D1 1.0000000 sec  
 DS 1

CHANNEL f1  
 SFO1 400.1924713 MHz  
 NUC1 13  
 P1 15.00 usec  
 PL1 10.39999942 W

F2 - Processing parameters  
 SI 455.34  
 SF 400.1920000 MHz  
 SW 0  
 SSB 0  
 GB 0  
 PC 1.00

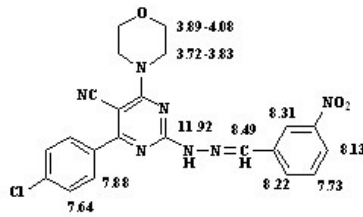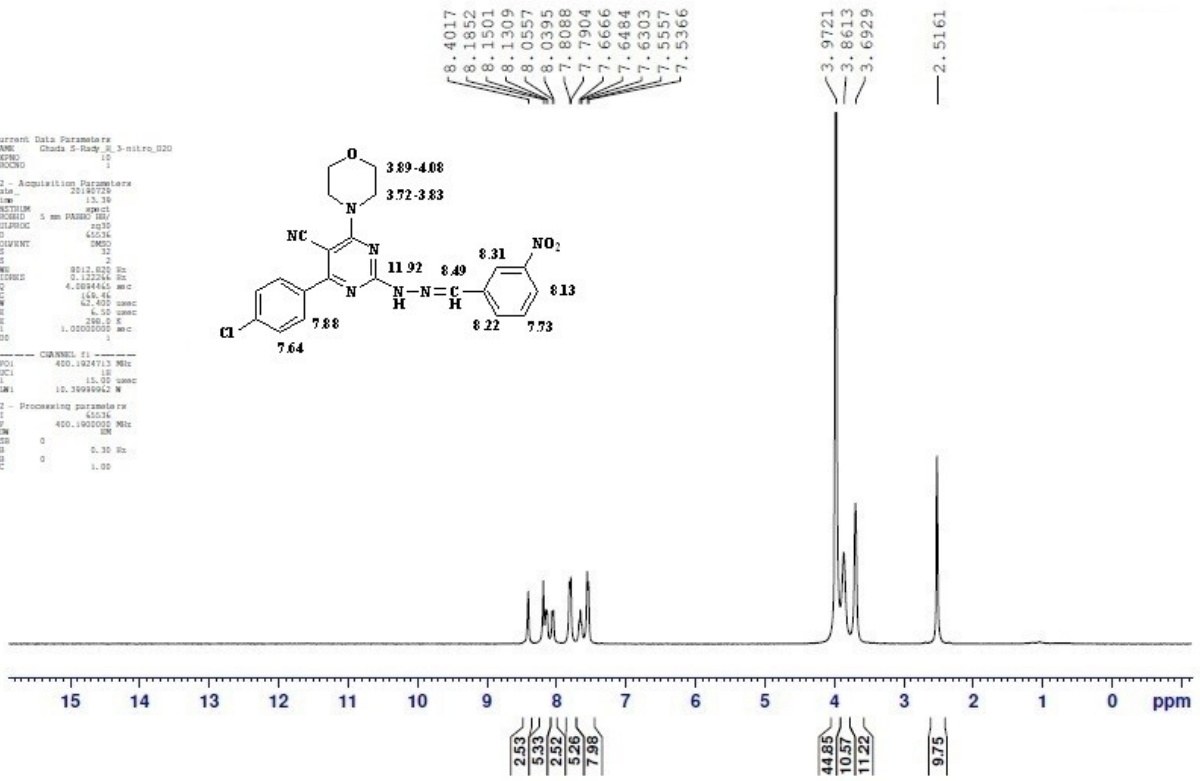

# The <sup>13</sup>C NMR spectrum of compound 12e

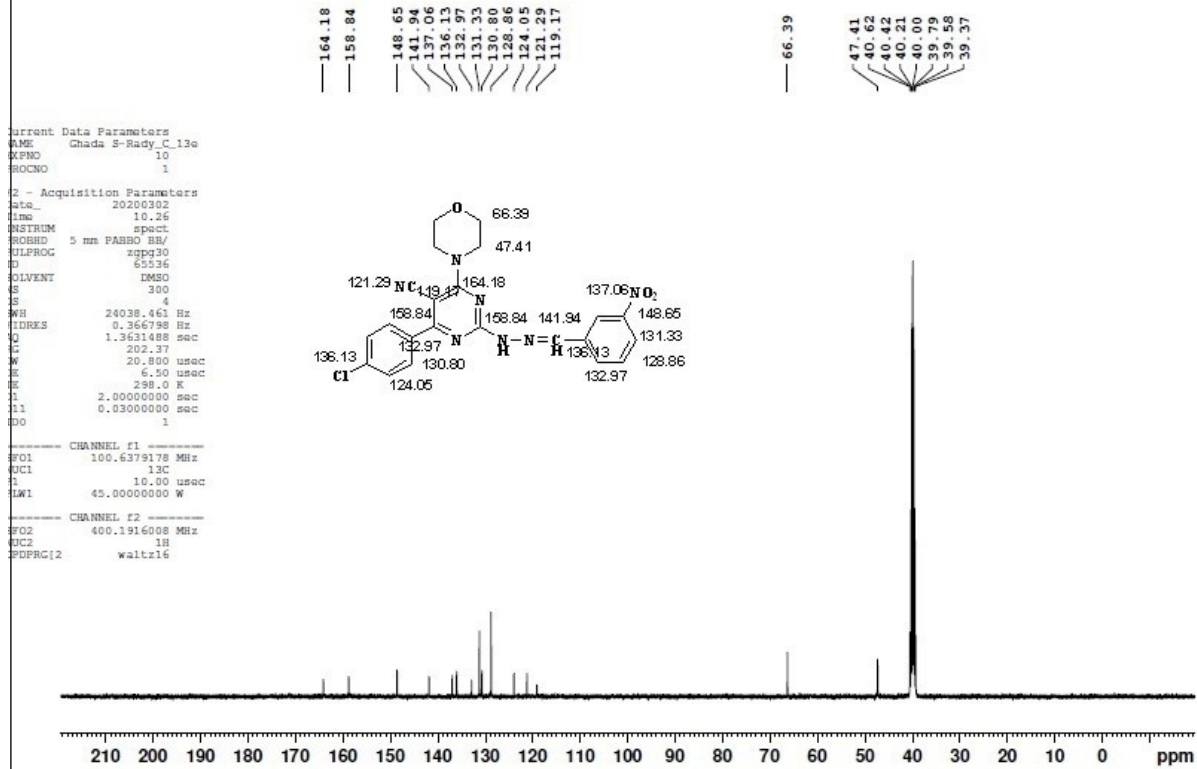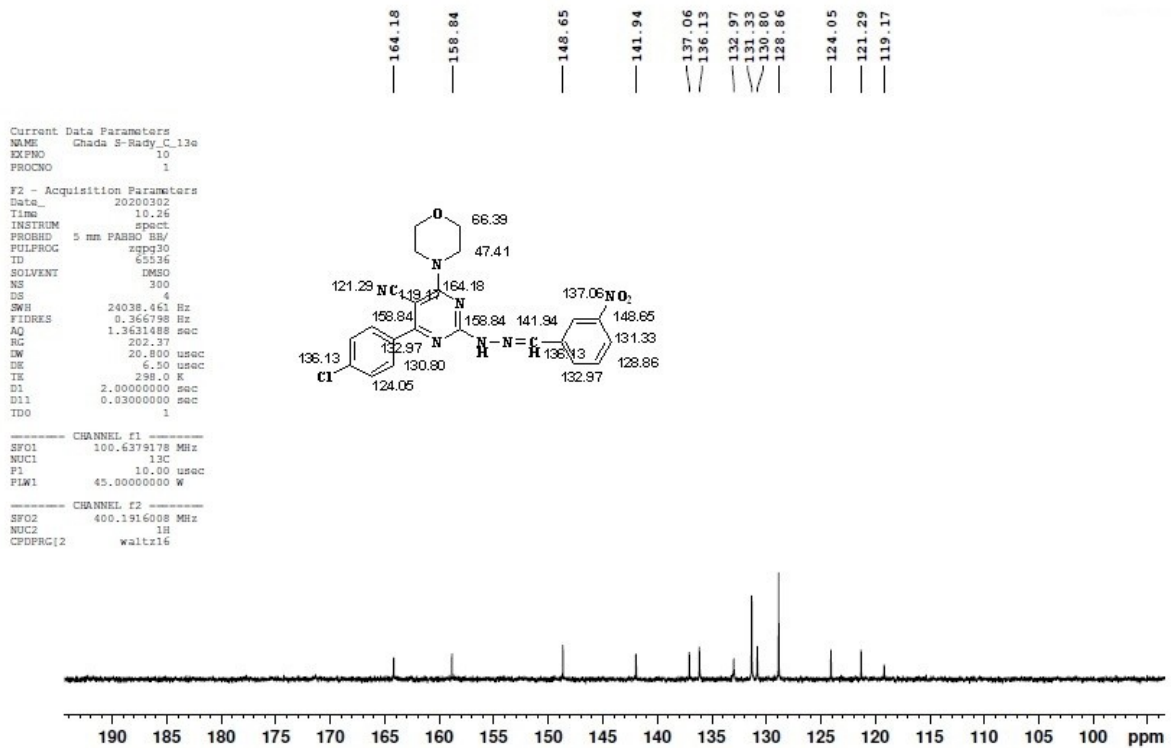

# The mass spectrum of compound 12e

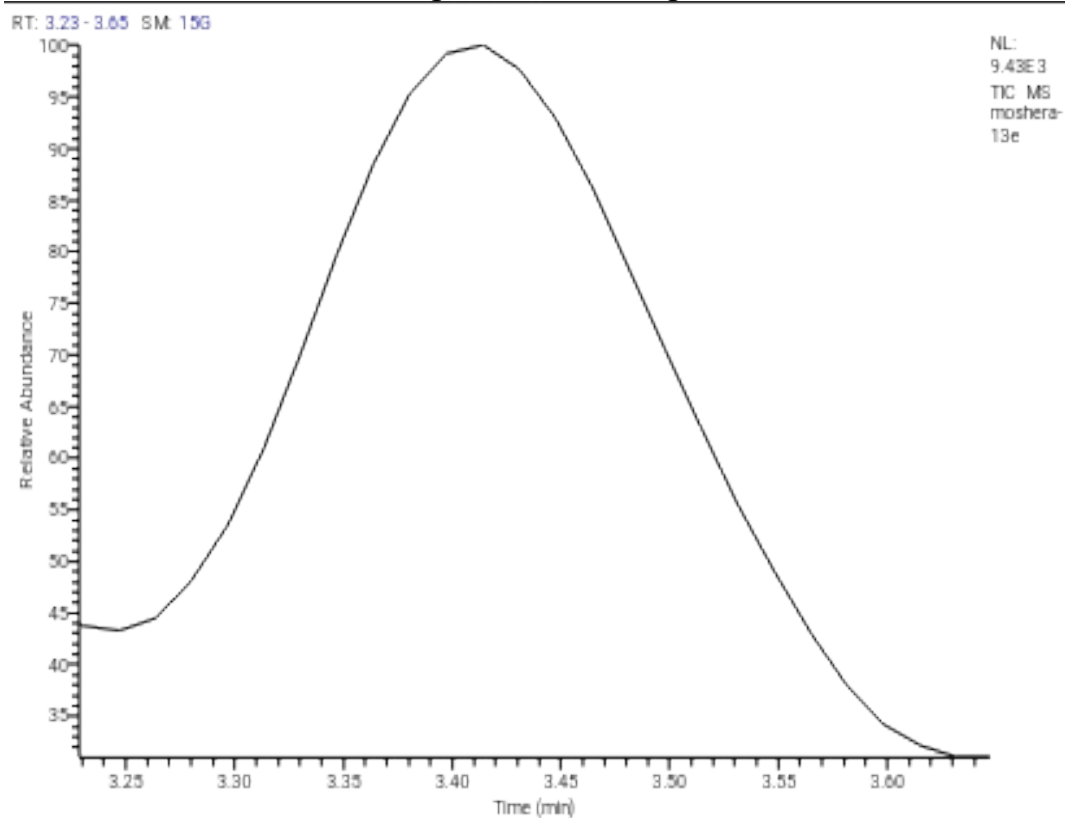

moshera-13e #34 RT: 0.59 AV: 1 SB: 2 4.45, 4.45 NL: 3.92E2  
T: {0,0} +c EI Full ms [40.00-1000.00]

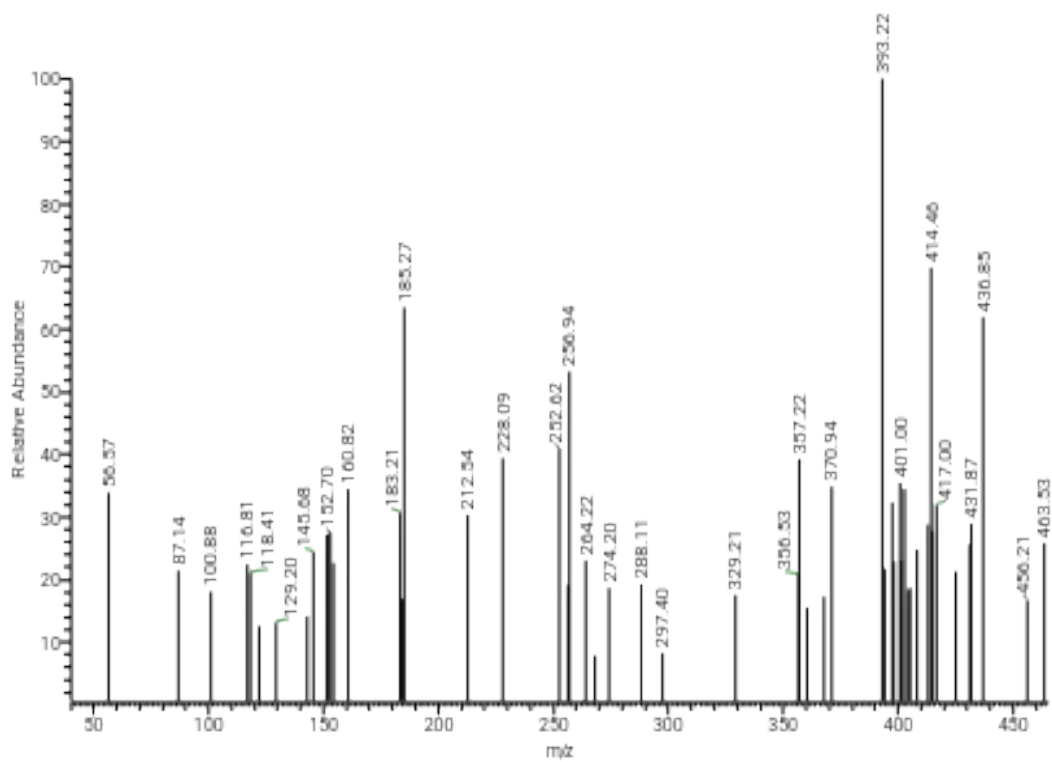

# Spectral data of compound 12f

## The IR spectrum of compound 12f

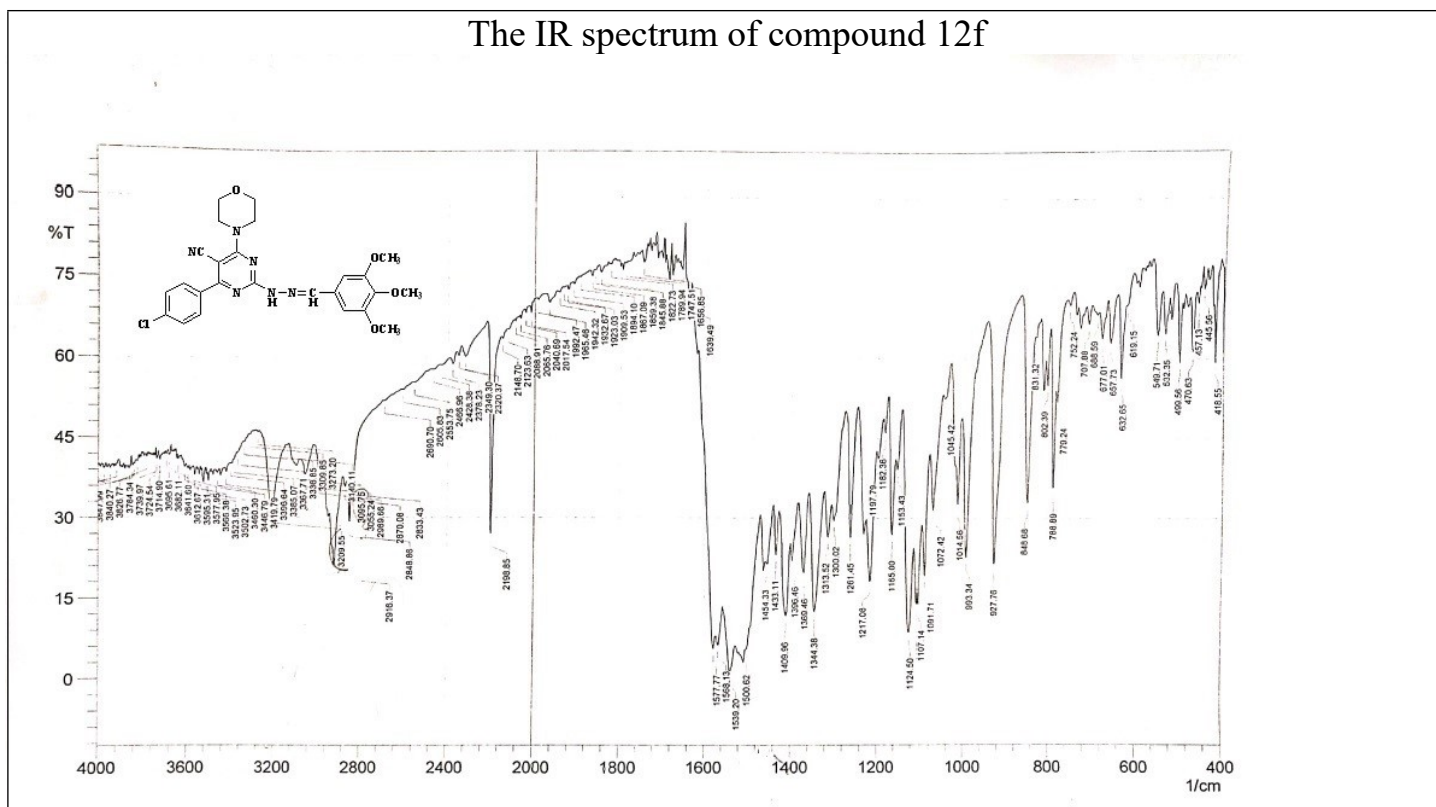

# The <sup>1</sup>H NMR spectrum of compound 12f

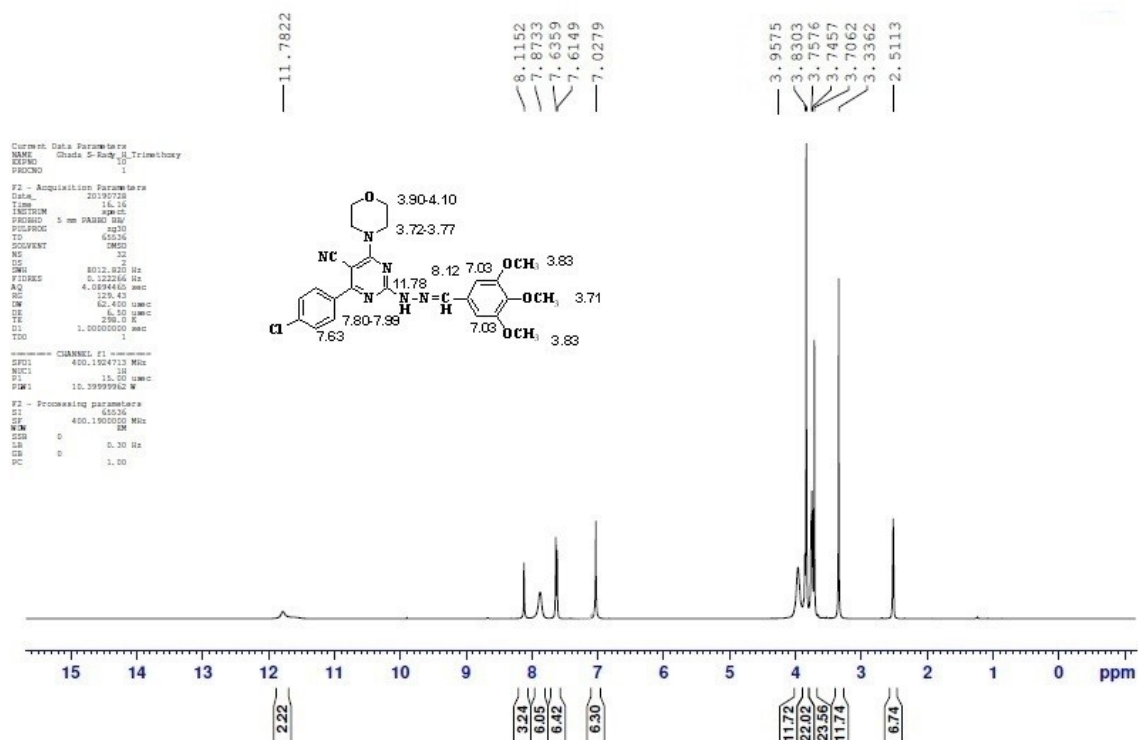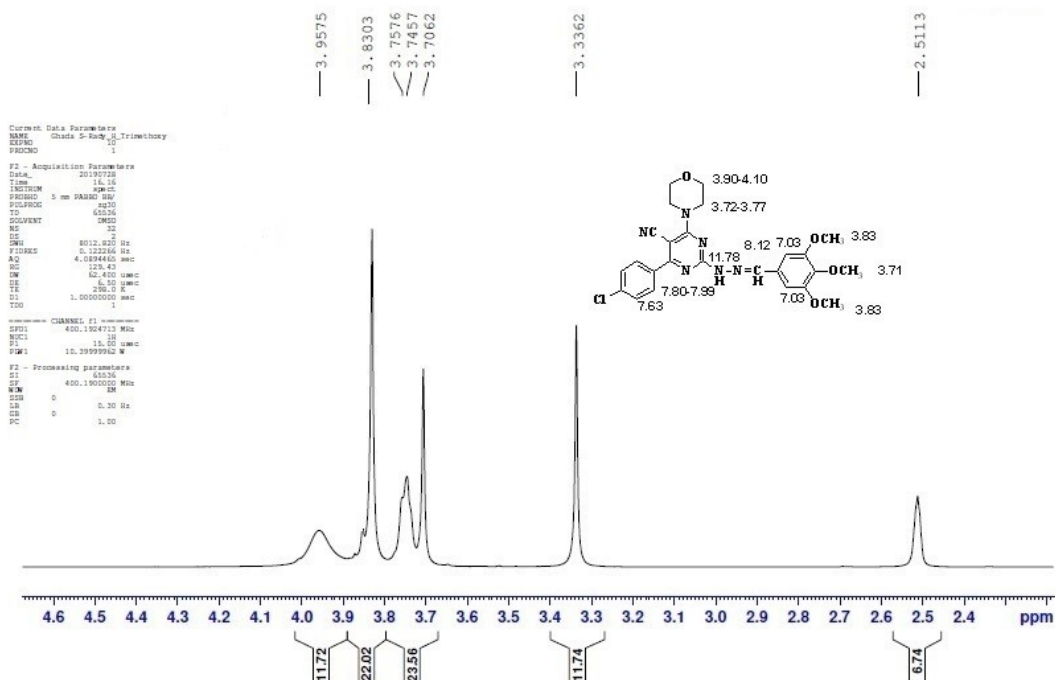

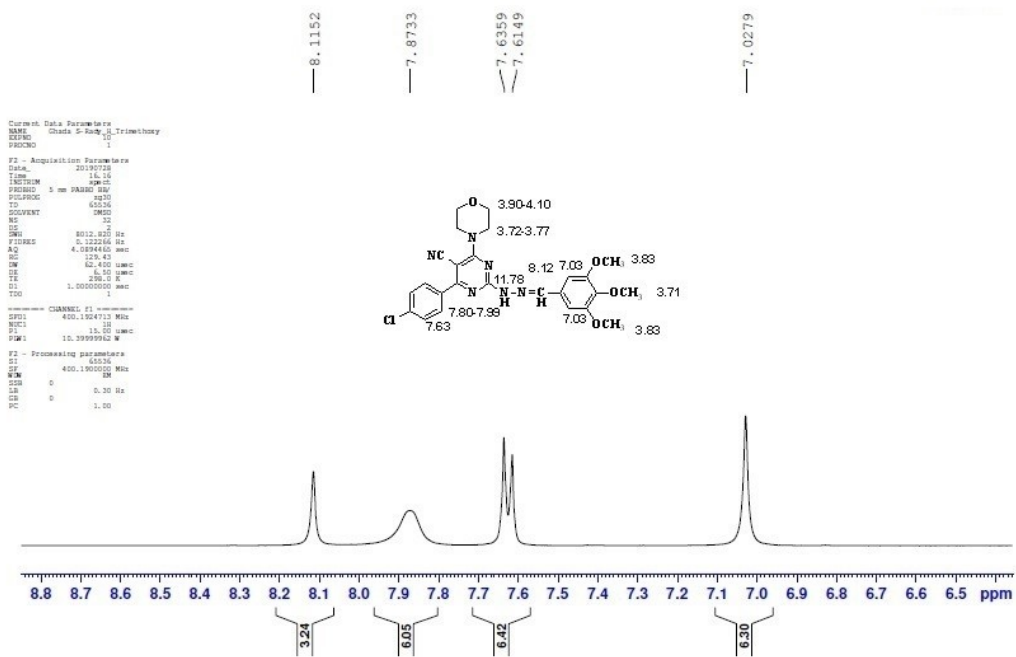

D2O

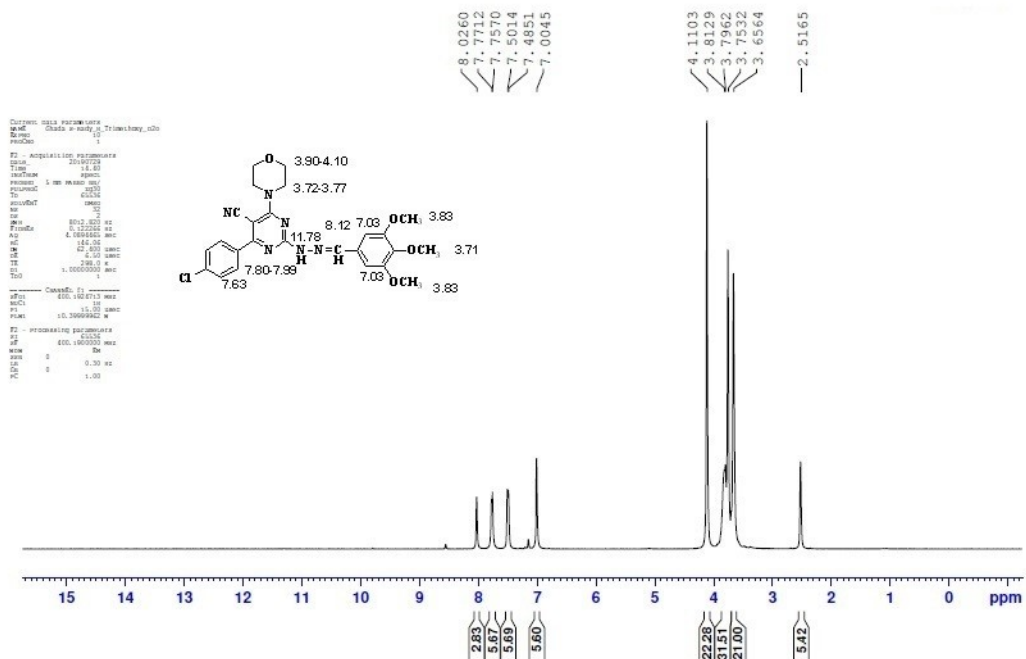

# The <sup>13</sup>C NMR spectrum of compound 12f

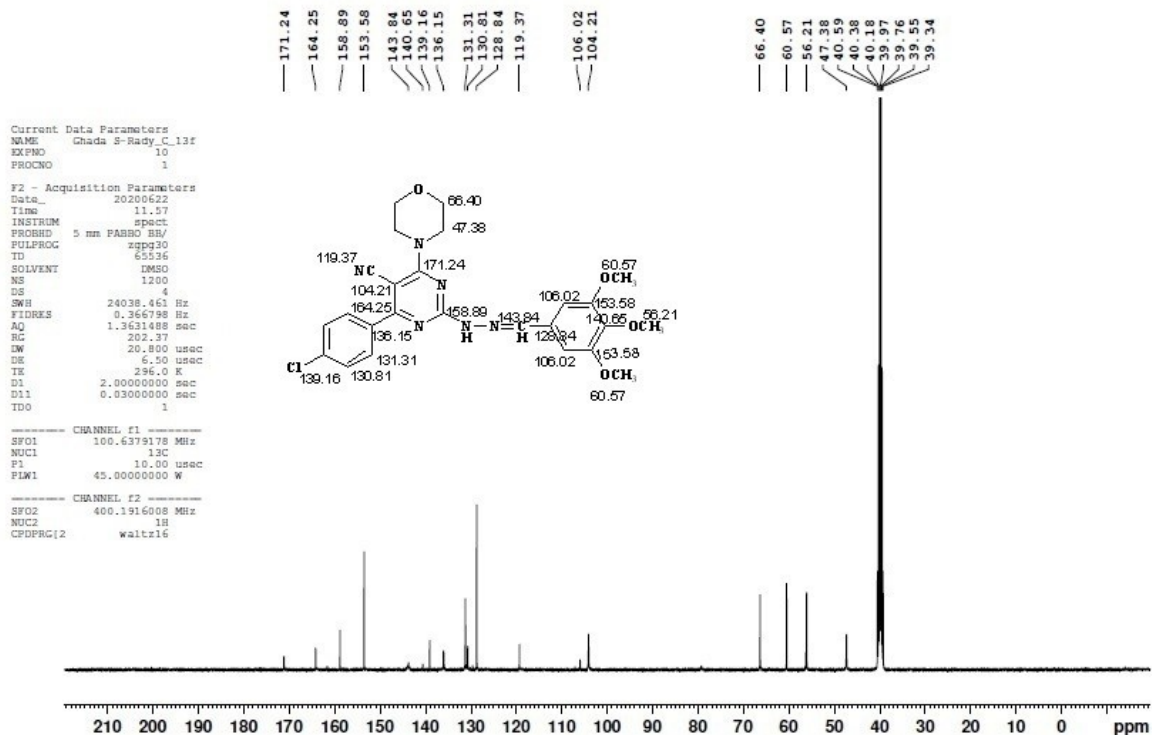

Ghada S-Rady\_C\_13f

Microanalytical Unit - FOPCU - NMR laboratory  
[www.pharma.cu.edu.eg](http://www.pharma.cu.edu.eg) [dir-mau.fopcu@pharma.cu.edu.eg](mailto:dir-mau.fopcu@pharma.cu.edu.eg)

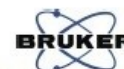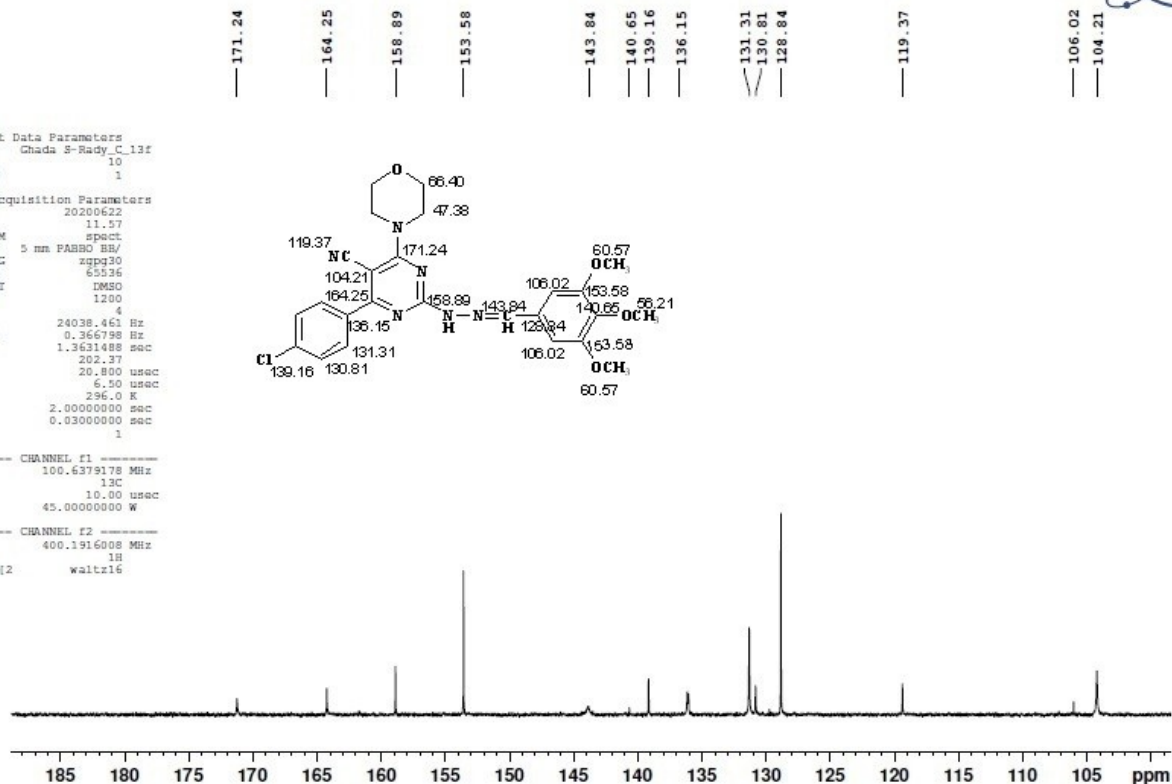

# The mass spectrum of compound 12f

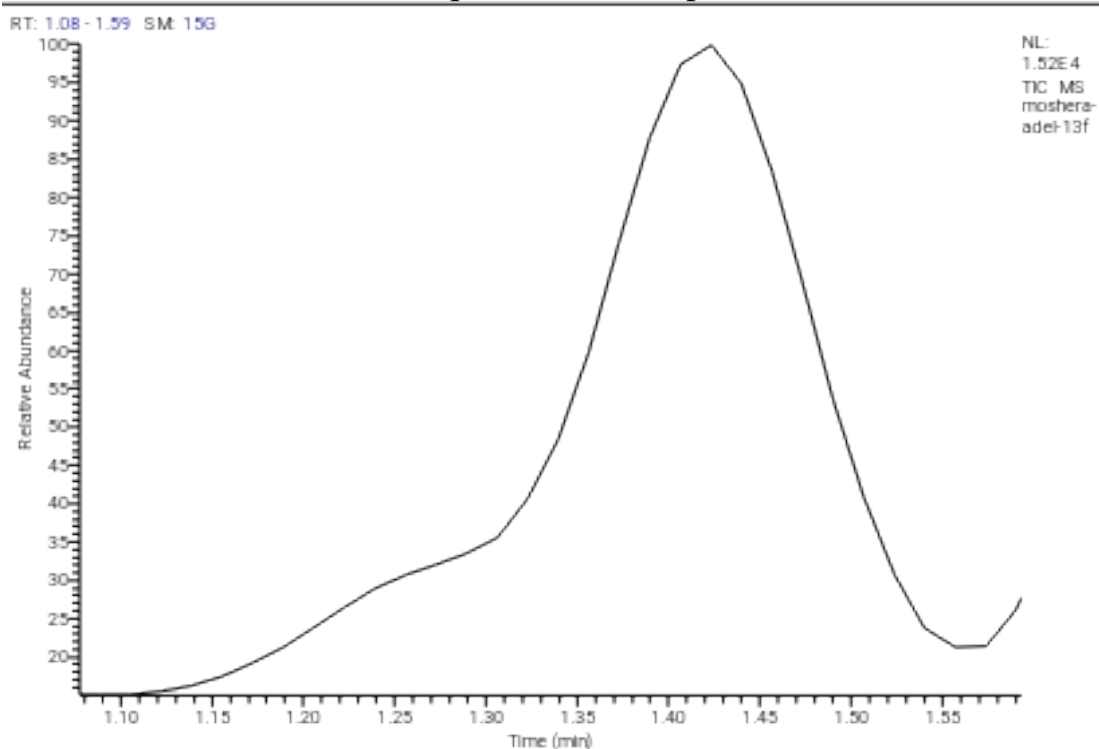

moshera-adel-13f #102 RT: 1.72 AV: 1 SB: 2 2.83, 2.83 NL: 4.08E2  
T: {0,0} + c E1Full ms [40.00-1000.00]

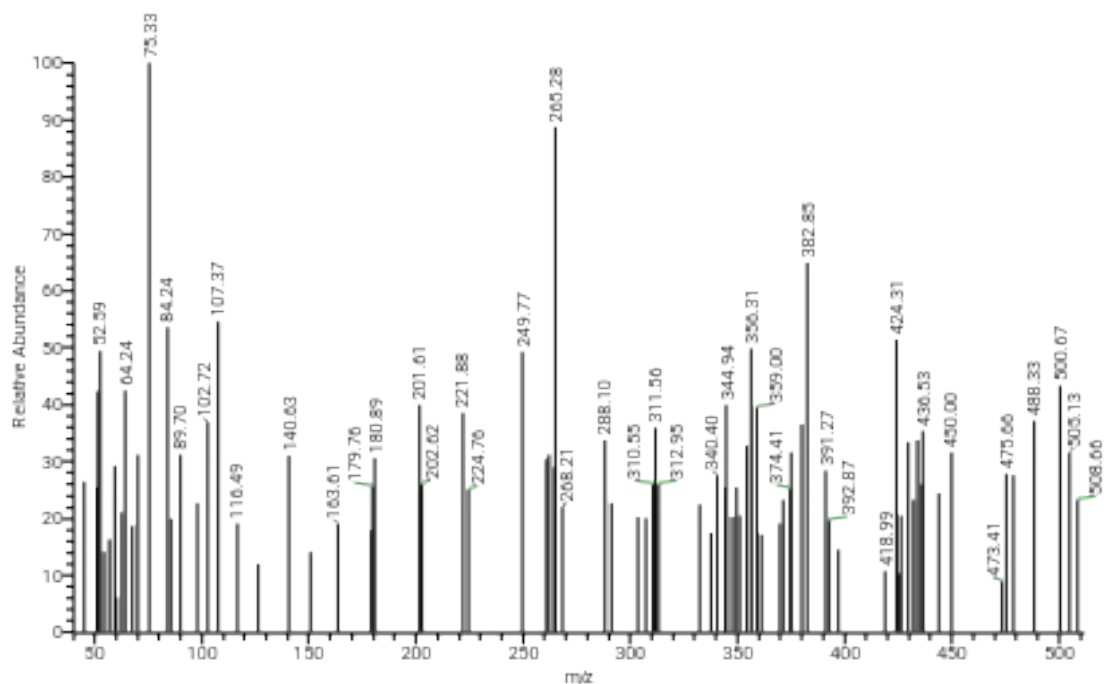



# Spectral data of compound 12g

## The IR spectrum of compound 12g

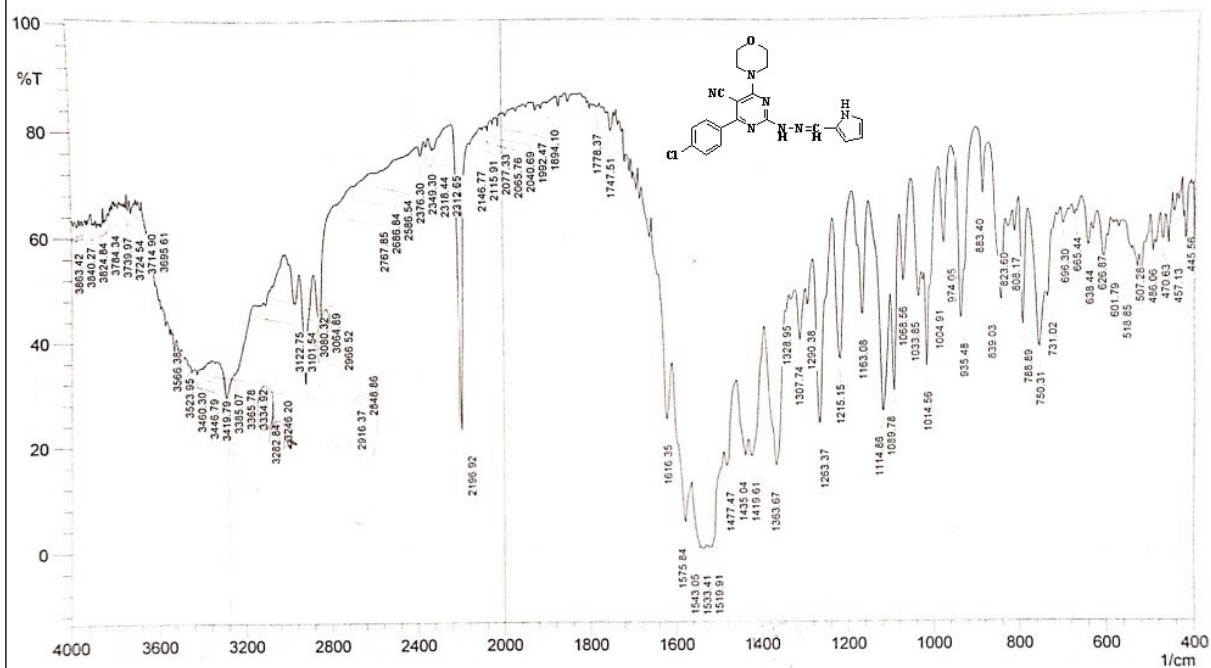

# The <sup>1</sup>H NMR spectrum of compound 12g

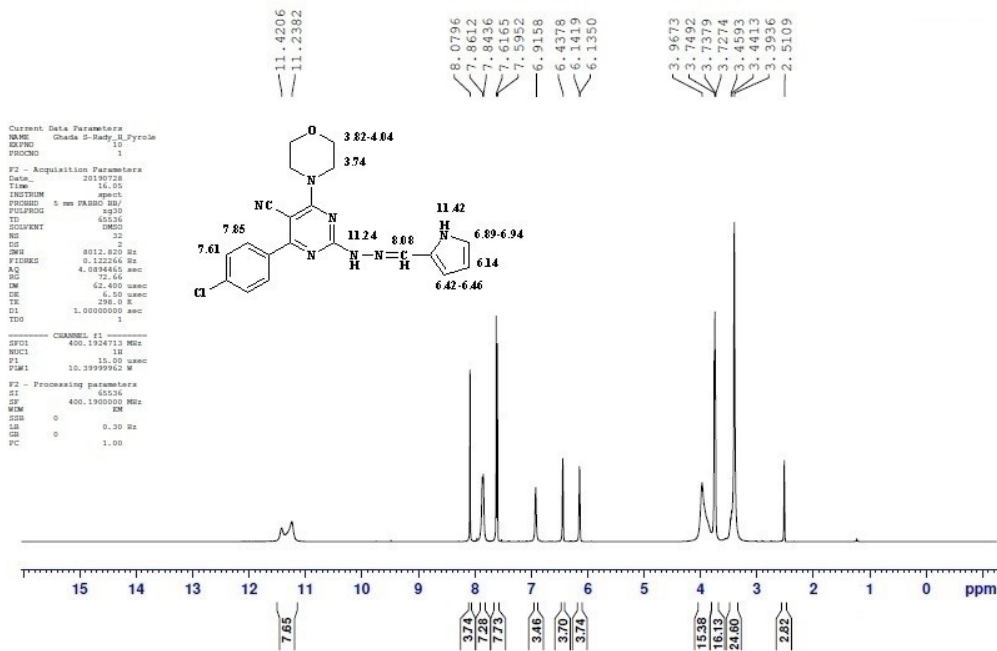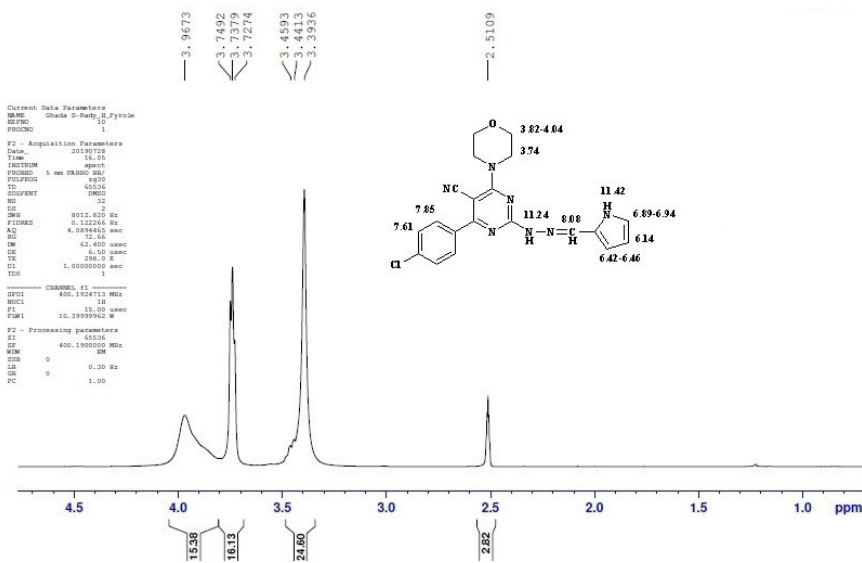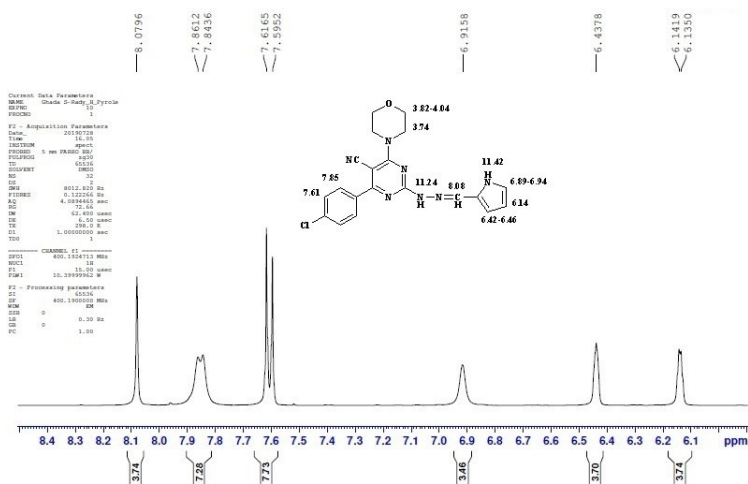

# The <sup>13</sup>C NMR spectrum of compound 12g

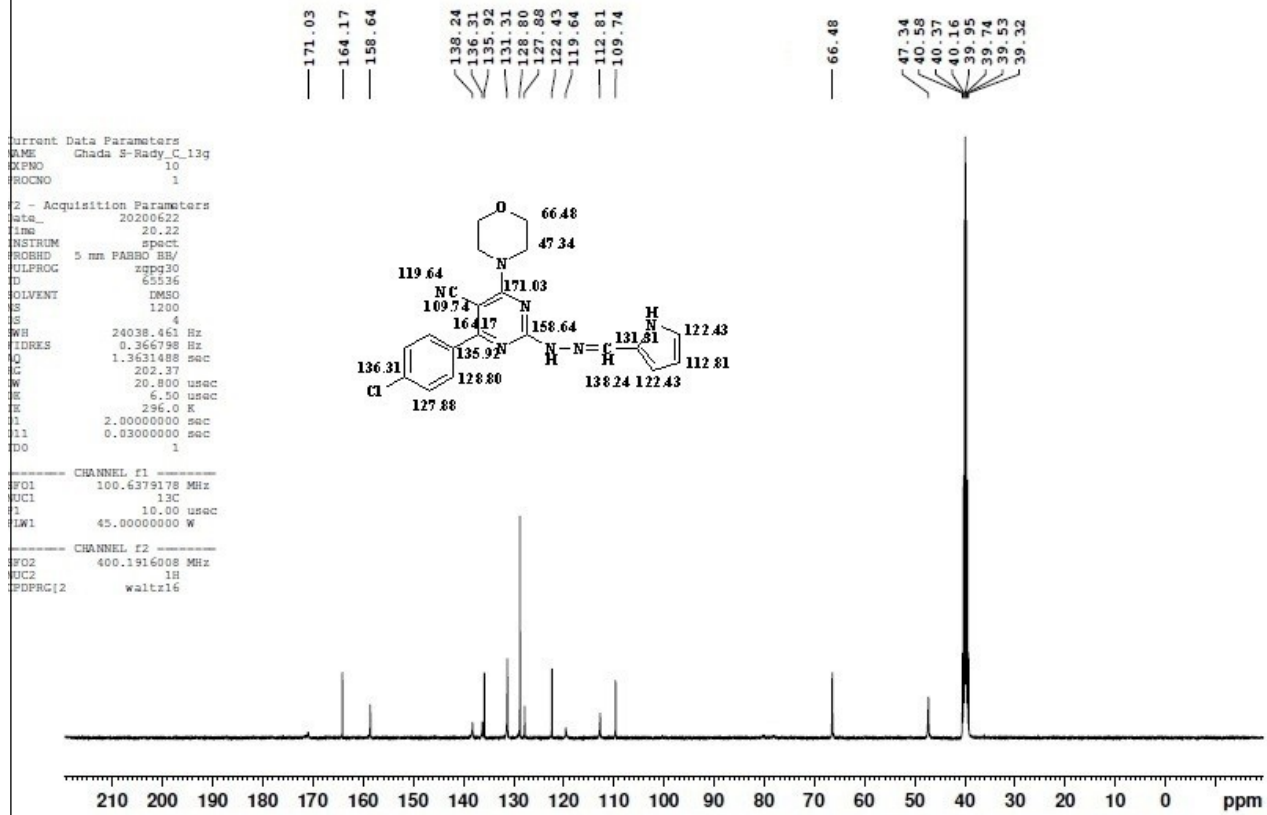



# The mass spectrum of compound 12g

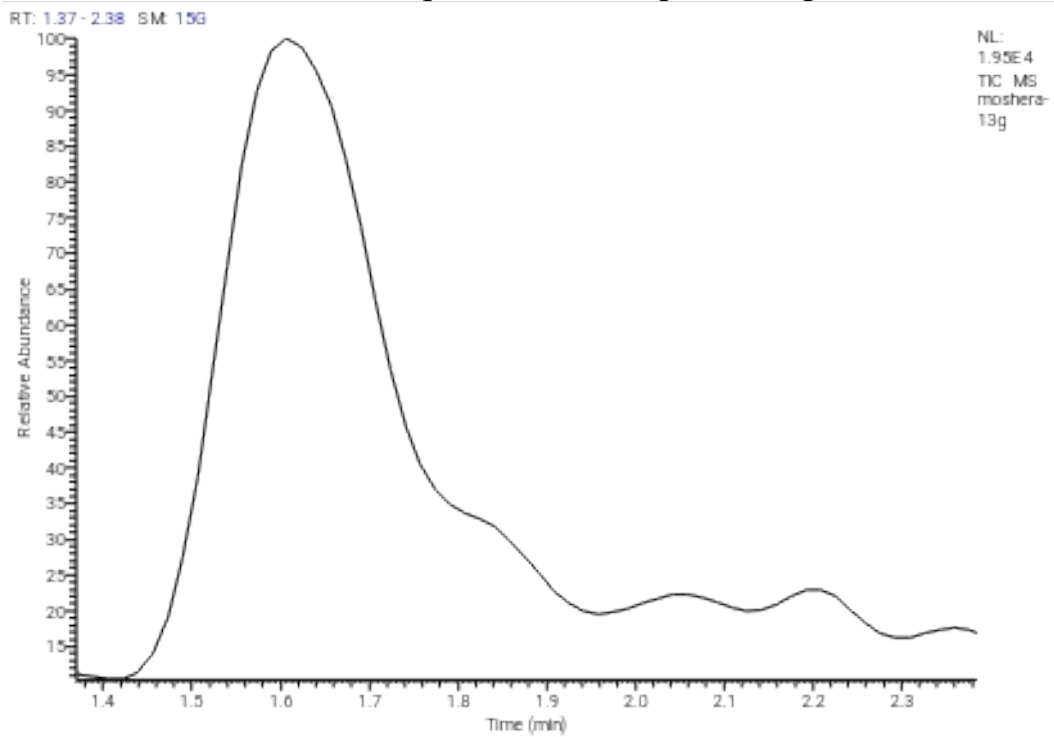

moshera-13g #243 RT: 4.08 AV: 1 SB: 2 4.45, 4.45 NL: 2.50E2  
T: {0,0} + cEI Full ms [40.00-1000.00]

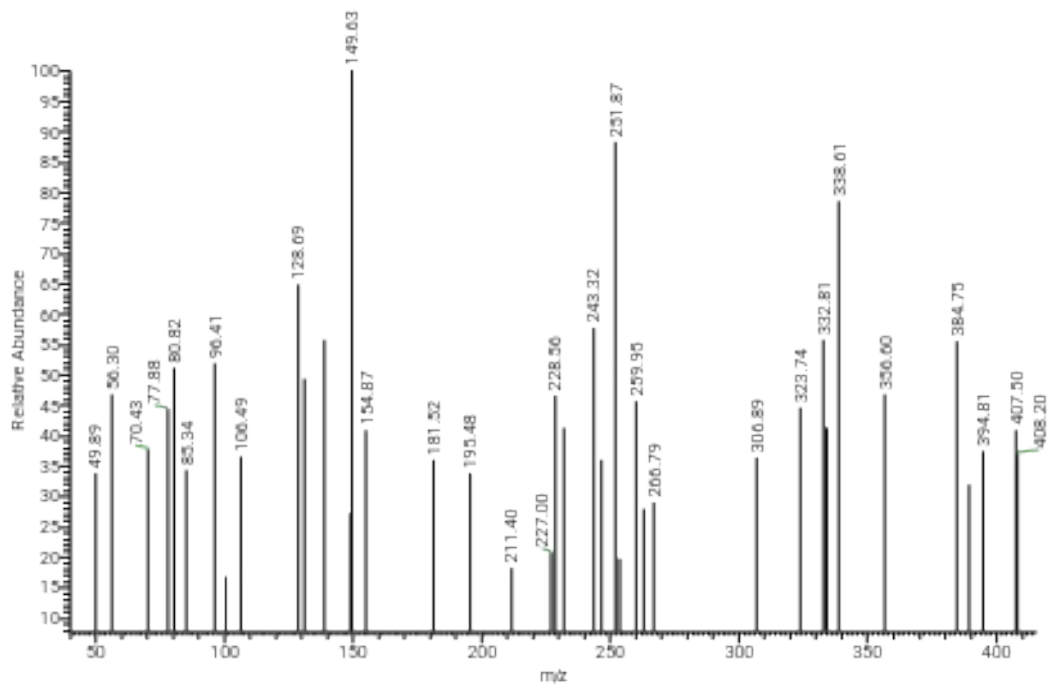

# Spectral data of compound 12h

## The IR spectrum of compound 12h

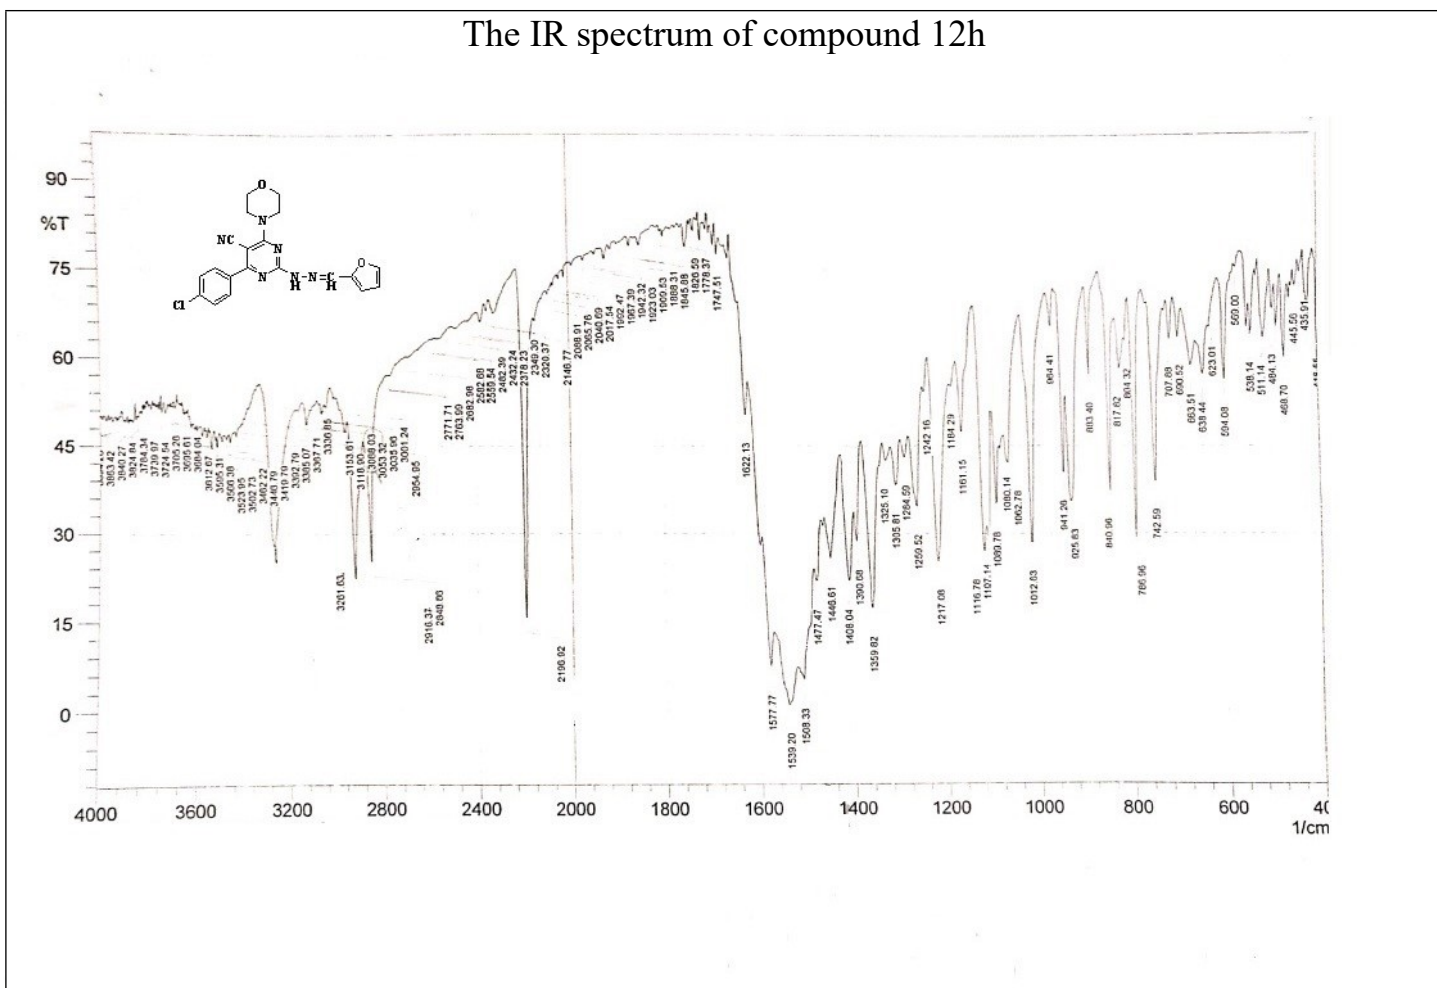

# The <sup>1</sup>H NMR spectrum of compound 12h

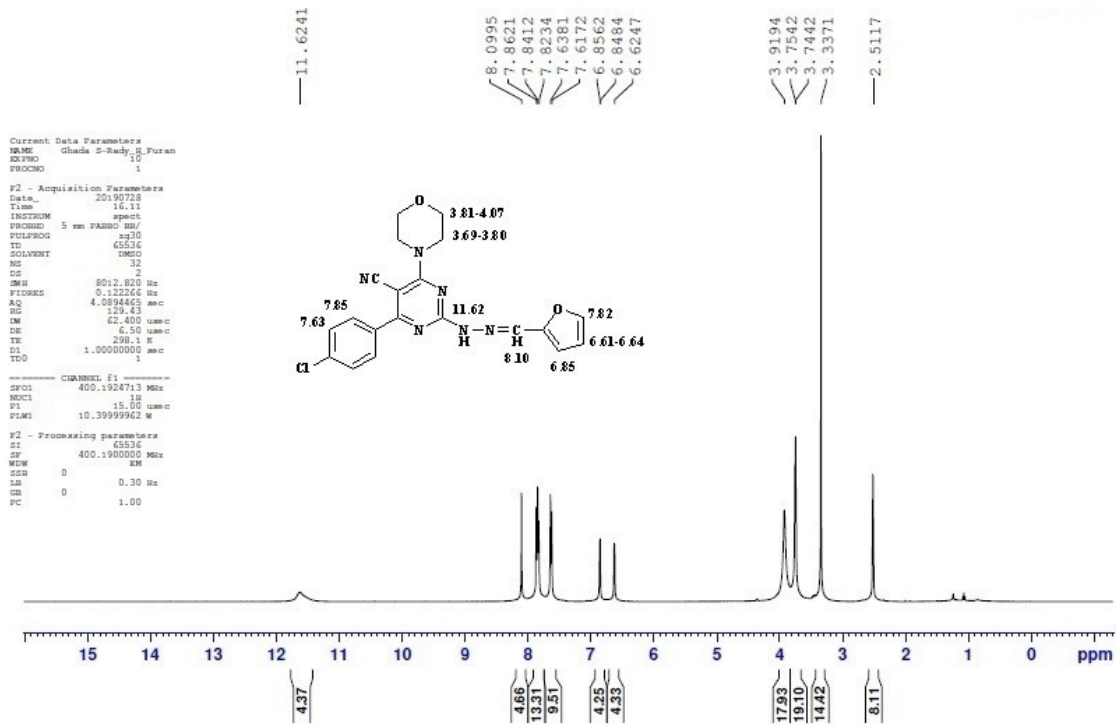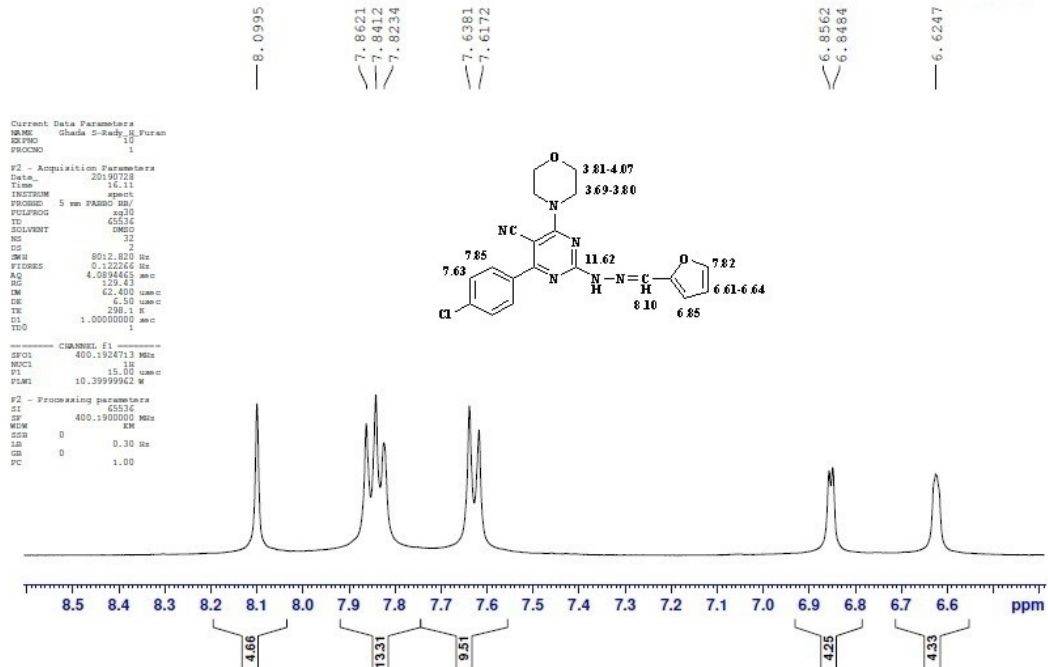

D2O

Current Data Parameters  
NAME Ghada 5-Ring\_4\_Furan\_D2O  
EXPNO 10  
PROCNO 1  
F2 - Acquisition Parameters  
Date\_ 20191213  
Time 14.33  
INSTRUM spect  
PROBHD 5 mm QNP1H  
PULPROG zgpg30  
TD 65536  
SOLVENT DMSO  
NS 32  
DS 2  
SWH 8012.820 Hz  
F2RES 0.322566 Hz  
AQ 4.0194445 sec  
RG 344.56  
DQ 12.400 umc  
DE 6.50 umc  
TE 300.2 K  
D1 1.00000000 sec  
TDO 1  
===== CHANNEL f1 =====  
NUC1 13C  
P1 15.00 umc  
PWL1 10.39999962 W  
F2 - Processing parameters  
SI 60076  
SF 400.1460000 MHz  
WDW EM  
SSB 0  
LB 0.30 Hz  
GB 0  
PC 1.00

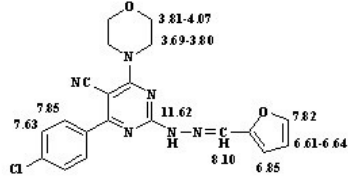

8.0375  
7.7999  
7.7819  
7.7279  
7.5645  
7.5464  
6.8221  
6.5898

3.9860  
3.8449  
3.6801

2.5169

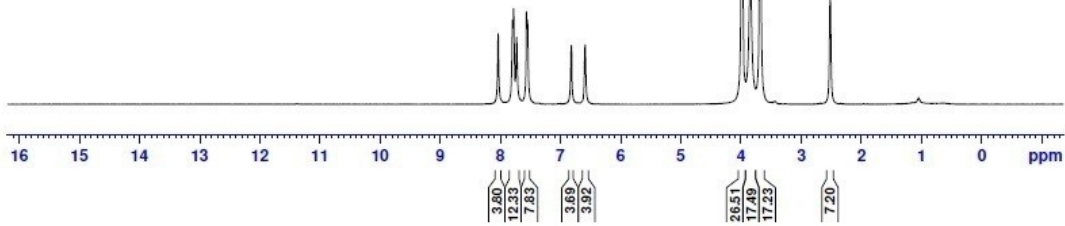



# The <sup>13</sup>C NMR spectrum of compound 12h

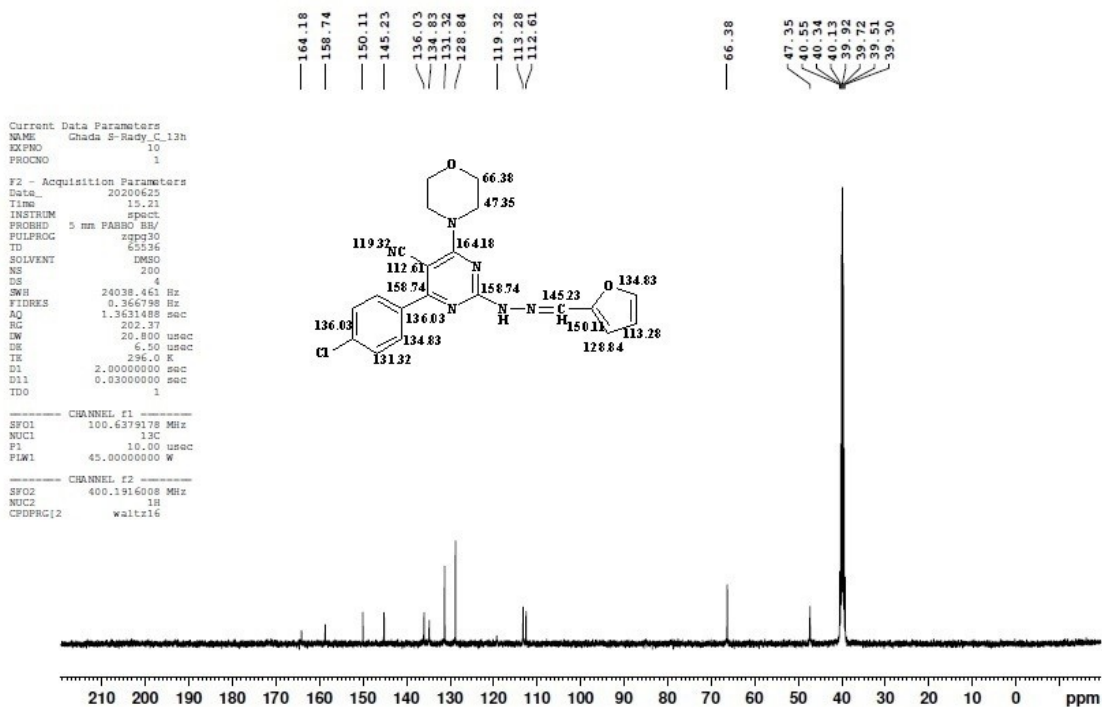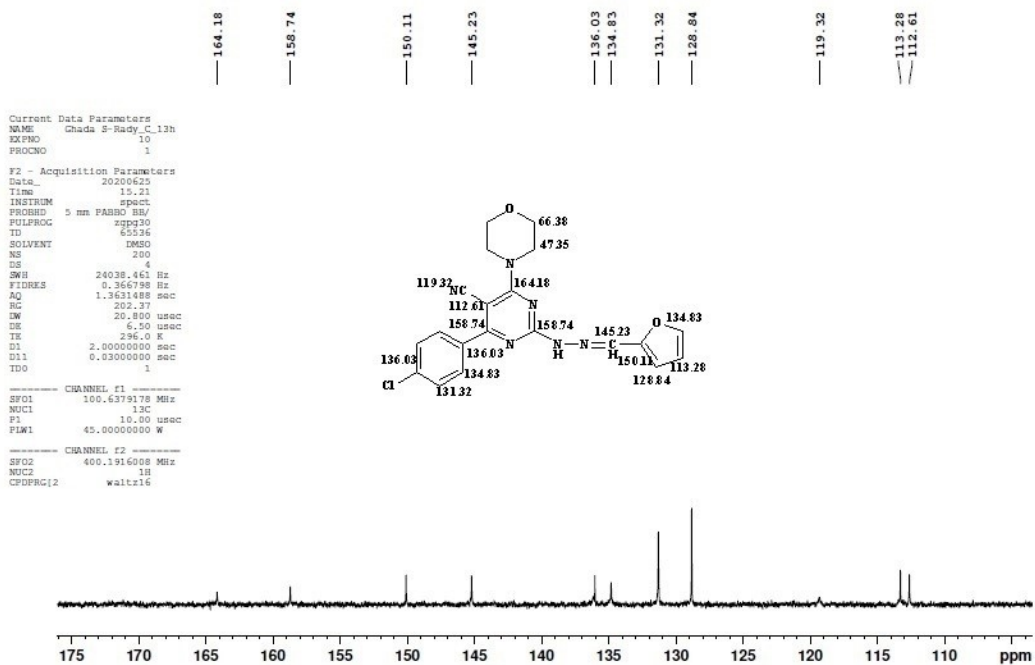

# The mass spectrum of compound 12h

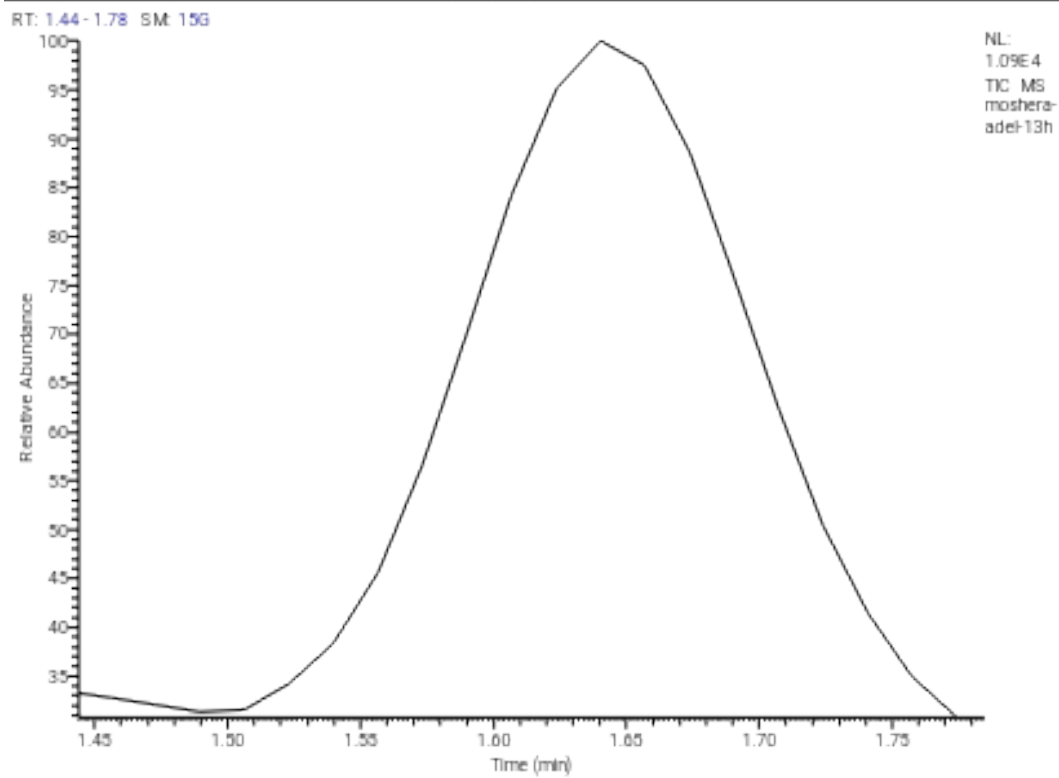

moshera-adel-13h #67 RT: 1.14 AV: 1 SB: 2 4.45, 4.45 NL: 3.00E2  
T: {0,0} +cEIFull.ms [40.00-1000.00]

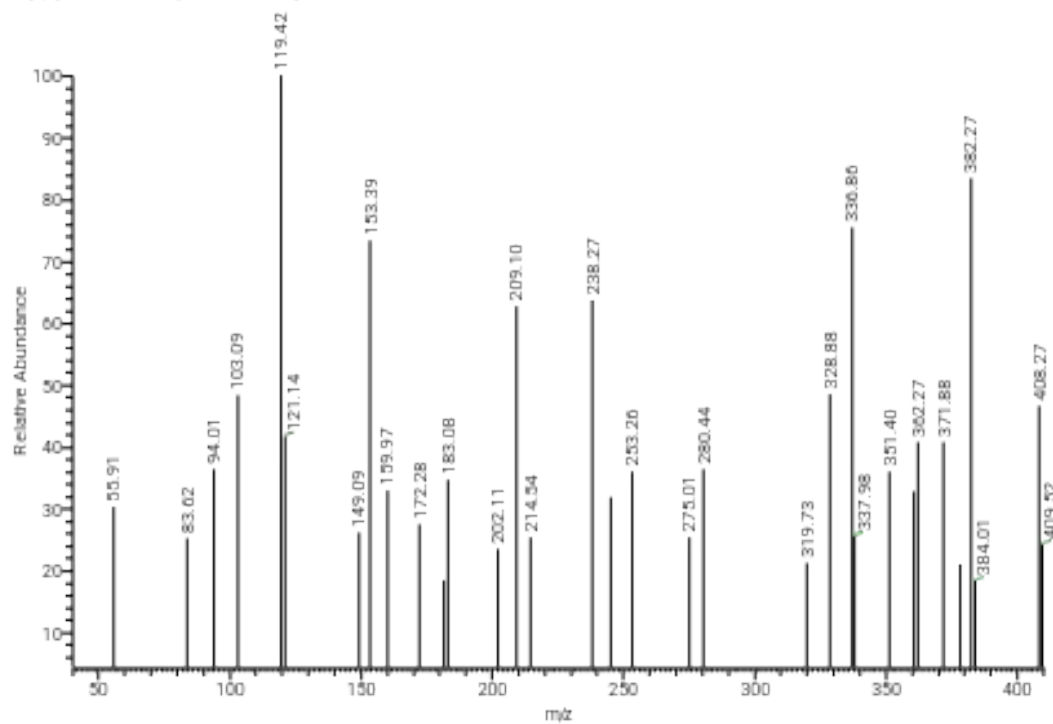

Supplement: d3md00693j2.pdf [file d3md00693j2.pdf]
